# Supplementary material for: Stress-Adaptive Responses Associated with High-Level Carbapenem Resistance in KPC-ProducingKlebsiella pneumoniae
Source: Hindawi journal article supplement (doi:10.1155/2018/3028290), 2018-01-01
Supplement: f1 [file 3028290.f1.pdf]

## SUPPLEMENTARY MATERIALS

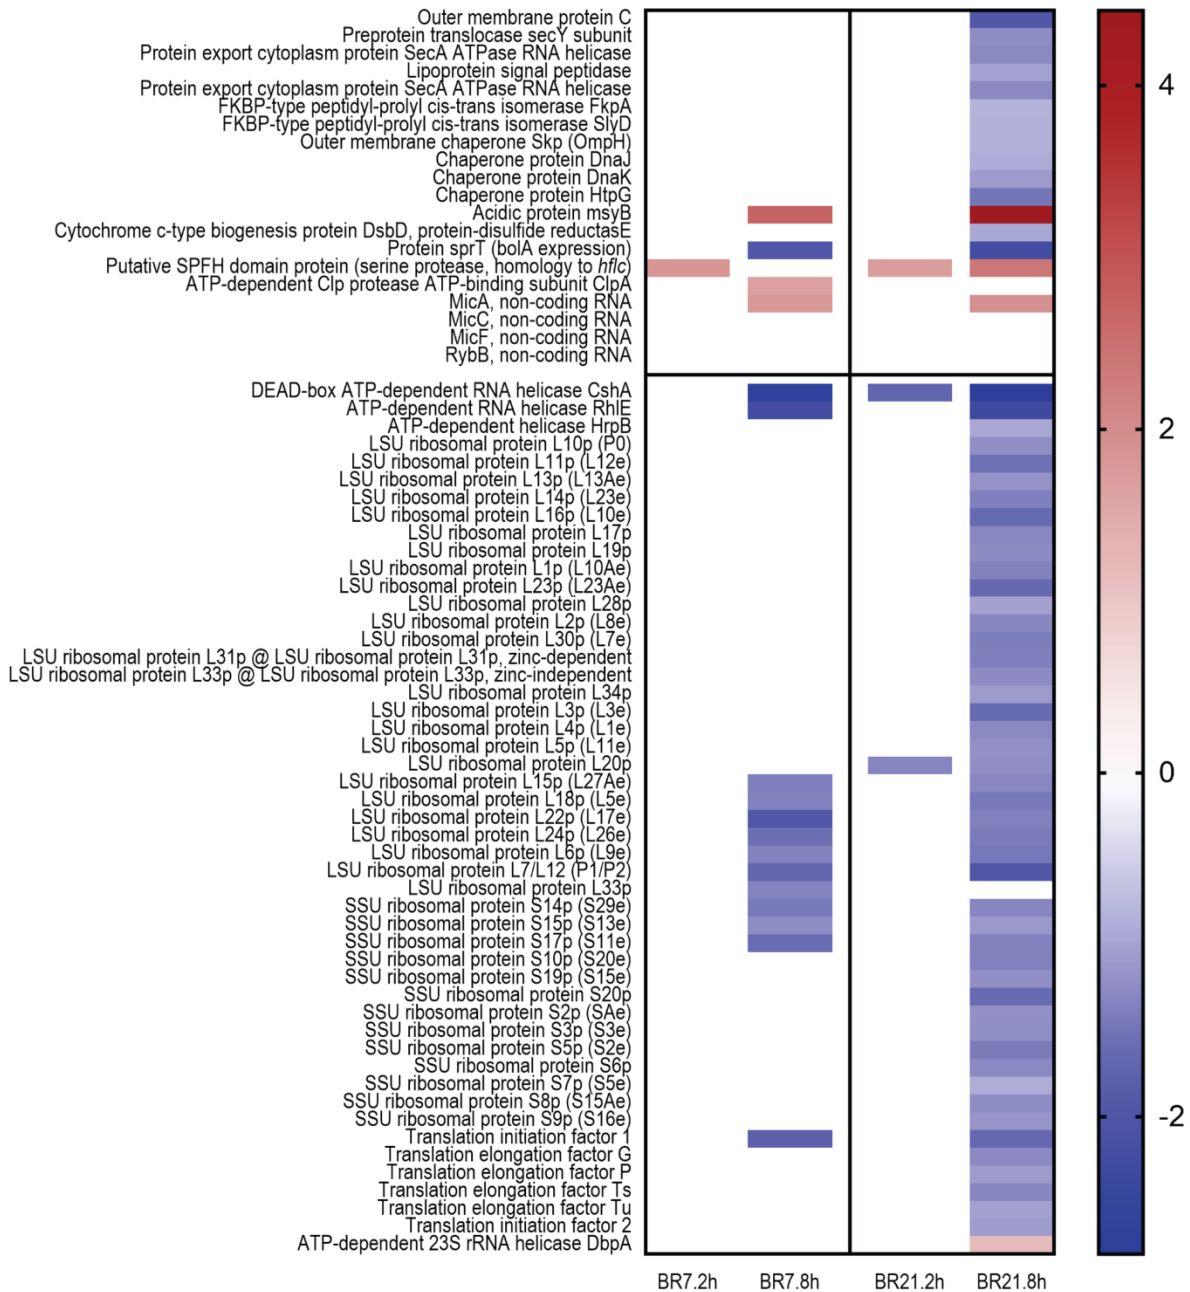

Fig. S1. **Lethal imipenem exposure is associated with a global dampening of protein synthesis.** Changes in outer membrane protein synthesis, protein transport and processing

(section 1, above the horizontal line), and protein translation (section 2, below the horizontal line) were observed to a greater extent in BR21 than in BR7 at 8h of imipenem exposure.

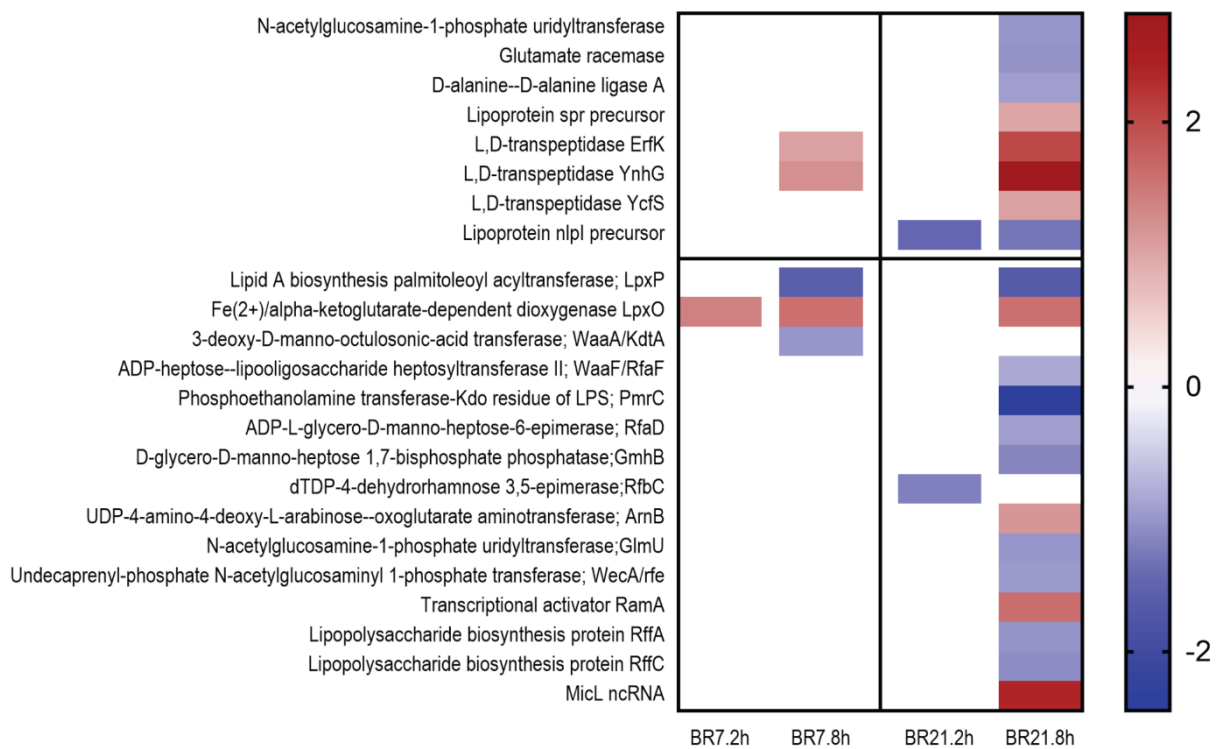

**Fig. S2. Transcriptional changes in the peptidoglycan biosynthetic pathway (section 1, lines 1-8), and in key junctures of lipopolysaccharide (LPS) biosynthesis (section 2, lines 9-23) after lethal imipenem exposure.** At 8h of exposure, genes involved in LPS synthesis were down-regulated more prominently in BR21 than in B7.

**Table S1: Characteristics of heteroresistant KPC-producing *K. pneumoniae* study strains, including source of infection, chromosome size, plasmid types and sizes, and carriage of prophage.**

|      | clonal group  | source | chromosome size | plasmid Inc types, size                                    | prophage                                           | type                                    | host                       |
|------|---------------|--------|-----------------|------------------------------------------------------------|----------------------------------------------------|-----------------------------------------|----------------------------|
| BR7  | ST437 (CG258) | blood  | 5,308,011       |                                                            | Fels2, NC010463 (intact)                           | Caudovirales, Peduovirinae, P2-like     | Enterobacteriaceae         |
|      |               |        |                 |                                                            | SEN34, NC028699 (intact)                           | Caudovirales, Podoviridae               | <i>Salmonella</i> serovars |
|      |               |        |                 |                                                            | Bphi-B1251, NC019541 (intact)                      | Caudovirales, Podoviridae               | <i>Acinetobacter</i> spp.  |
|      |               |        |                 |                                                            | ST64B, NC004313 (intact)                           | Caudovirales, Mu-like                   | <i>Salmonella</i> serovars |
|      |               |        |                 |                                                            | P4, NC001609 (partial)                             | Caudovirales, Peduovirinae, P2-like     | Enterobacteriaceae         |
|      |               |        |                 | pQIL (FIB, N), 112 kb (harbors <i>bla</i> <sub>KPC</sub> ) |                                                    |                                         |                            |
|      |               |        |                 |                                                            | SPBc2, NC001884 (partial)                          | Caudovirales, Siphoviridae              | <i>Bacillus</i> spp.       |
|      |               |        |                 |                                                            | FiAA91-ss, NC022750 (partial)                      | Caudovirales, Peduovirinae, P2-like     | Enterobacteriaceae         |
|      |               |        |                 |                                                            | P1, NC005856 (partial)                             | Caudovirales, Myoviridae, P1            | Enterobacteriaceae         |
|      |               |        |                 |                                                            |                                                    |                                         |                            |
| BR21 | ST437 (CG258) | urine  | 5,368,098       |                                                            | SPN1S, NC016761 (intact)                           | Caudovirales, Podoviridae               | <i>Salmonella</i> serovars |
|      |               |        |                 |                                                            | Fels2, NC010463 (intact)                           | Caudovirales, Peduovirinae, P2-like     | Enterobacteriaceae         |
|      |               |        |                 |                                                            | HK639, NC016158 (intact)                           | Caudovirales, Siphoviridae, Lambda-like | <i>E. coli</i>             |
|      |               |        |                 |                                                            | SEN34, NC028699 (intact)                           | Caudovirales, Podoviridae               | <i>Salmonella</i> serovars |
|      |               |        |                 |                                                            | ST64B, NC004313 (partial)                          | Caudovirales, Mu-like                   | <i>Salmonella</i> serovars |
|      |               |        |                 |                                                            | P4, NC001609 (partial)                             | Caudovirales, Peduovirinae, P2-like     | Enterobacteriaceae         |
|      |               |        |                 |                                                            | TL2011b, NC019445 (partial)                        | Caudovirales, Podoviridae               | <i>E. coli</i>             |
|      |               |        |                 | IncF, 214 kb                                               | P1, NC005856 (partial)                             | Caudovirales, Myoviridae, P1            | Enterobacteriaceae         |
|      |               |        |                 |                                                            | Ectocarpus siliculosus virus 1, NC002687 (partial) | Phycodnaviridae, Phaeovirus             | marine brown algae         |
|      |               |        |                 |                                                            | Spbeta-like, NC029119 (partial)                    | Caudovirales, Siphoviridae              | <i>Staphylococcus</i> spp. |
|      |               |        |                 | IncN, 121 kb (harbors <i>bla</i> <sub>KPC</sub> )          | P1, NC005856 (partial)                             | Caudovirales, Myoviridae, P1            | Enterobacteriaceae         |
|      |               |        |                 |                                                            | Stx2-converting phage 1717, NC011357 (partial)     |                                         |                            |
|      |               |        |                 |                                                            |                                                    |                                         |                            |
|      |               |        |                 |                                                            |                                                    | Caudovirales, Siphoviridae, Lambda-like | <i>E. coli</i> O157:H7     |

**Table S2. Chromosomal sequence identity and variant analysis of KPC *K. pneumoniae* study strains, and variant analysis between unexposed and imipenem-exposed samples. BR7 v BR21, chromosomal identity:**

| product                                                                                          | Protein Effect | SNV<br>(functional) | SNV<br>(silent) | MNP | indels | variant<br>nucleotide(s) | Minimum   | Maximum   | Length | Polymorphism Type  | Variant P-<br>Value<br>(approximate) | Amino<br>Acid<br>Change | CDS<br>Position |
|--------------------------------------------------------------------------------------------------|----------------|---------------------|-----------------|-----|--------|--------------------------|-----------|-----------|--------|--------------------|--------------------------------------|-------------------------|-----------------|
| ADA regulatory protein / Methylated-DNA--<br>protein-cysteine methyltransferase (EC<br>2.1.1.63) | Substitution   | 1                   |                 |     |        | C                        | 1,263,876 | 1,263,876 | 1      | SNP (transition)   | 0.01                                 | S -> P                  | 118             |
| Adenylosuccinate lyase (EC 4.3.2.2)                                                              | Substitution   | 1                   |                 |     |        | T                        | 3,480,667 | 3,480,667 | 1      | SNP (transversion) | 0.01                                 | I -> N                  | 836             |
| Aldehyde dehydrogenase (EC 1.2.1.3)                                                              | Extension      | 0                   | 1               |     |        | T                        | 187,193   | 187,193   | 1      | SNP (transversion) | 0.01                                 |                         | 1,240           |
| Carbon starvation protein A                                                                      | Substitution   | 1                   |                 |     |        | A                        | 2,901,651 | 2,901,651 | 1      | SNP (transversion) | 0.01                                 | A -> D                  | 1,550           |
| Cellulose synthase operon protein C                                                              | Extension      | 0                   |                 |     | 1      |                          | 1,150,481 | 1,154,530 | 4,050  | Deletion           | 0.1                                  |                         | 4               |
| Cyanate transport protein CynX                                                                   | Substitution   | 1                   |                 |     |        | A                        | 5,191,198 | 5,191,198 | 1      | SNP (transition)   | 0.01                                 | M -> I                  | 426             |
| Cyclic di-GMP binding protein precursor                                                          | Extension      | 0                   |                 |     | 1      |                          | 1,154,530 | 1,154,532 | 3      | Deletion           | 0.1                                  |                         | 2,434           |
| Di/tripeptide permease DtpA                                                                      | Substitution   | 1                   |                 |     |        | T                        | 4,382,479 | 4,382,479 | 1      | SNP (transition)   | 0.01                                 | P -> S                  | 1,009           |
| DNA helicase IV                                                                                  | Substitution   | 1                   |                 |     |        | A                        | 3,344,596 | 3,344,596 | 1      | SNP (transversion) | 0.01                                 | L -> M                  | 979             |
| Endoglucanase precursor (EC 3.2.1.4)                                                             | Extension      | 0                   |                 |     | 1      |                          | 1,148,992 | 1,149,993 | 1,002  | Deletion           | 0.1                                  |                         | 1               |
| Exonuclease SbcD                                                                                 | Substitution   | 1                   |                 |     |        | G                        | 2,557,445 | 2,557,445 | 1      | SNP (transversion) | 0.01                                 | R -> P                  | 398             |
| FIG002337: predicted inner membrane<br>protein                                                   | Extension      | 0                   |                 |     | 1      |                          | 1,147,215 | 1,148,884 | 1,670  | Deletion           | 0.1                                  |                         | 11              |
| FIG00613381: hypothetical protein                                                                | Extension      | 0                   |                 |     | 1      |                          | 1,150,005 | 1,150,481 | 477    | Deletion           | 0.1                                  |                         | 1               |
| FIG00731367: hypothetical protein                                                                | Substitution   | 1                   |                 |     |        | G                        | 1,828,190 | 1,828,190 | 1      | SNP (transversion) | 0.01                                 | L -> F                  | 1,446           |
| FIG01046265: hypothetical protein                                                                | Substitution   | 1                   |                 |     |        | G                        | 3,399,312 | 3,399,312 | 1      | SNP (transversion) | 0.01                                 | D -> A                  | 434             |
| Glucosamine--fructose-6-phosphate<br>aminotransferase [isomerizing] (EC 2.6.1.16)                | Substitution   | 1                   |                 |     |        | A                        | 2,123,552 | 2,123,552 | 1      | SNP (transversion) | 0.01                                 | S -> T                  | 361             |
| Glucose-1-phosphatase (EC 3.1.3.10)                                                              | Substitution   | 1                   |                 |     |        | G                        | 3,372,816 | 3,372,816 | 1      | SNP (transition)   | 0.01                                 | M -> V                  | 19              |
| Mobile element (HokE protein)                                                                    | Truncation     | 0                   |                 |     | 1      | AGAGCAATGT               | 290,778   | 290,777   | 0      | Insertion          | 0.01                                 |                         | 81              |
| hypothetical protein                                                                             | Extension      | 0                   |                 |     | 1      |                          | 2,009,528 | 2,009,755 | 228    | Deletion           | 0.1                                  |                         | 1               |
| LysR-family transcriptional regulator<br>STM3020                                                 | Substitution   | 1                   |                 |     |        | T                        | 464,901   | 464,901   | 1      | SNP (transition)   | 0.01                                 | V -> I                  | 34              |
| Maltose/maltodextrin transport ATP-binding<br>protein MalK (EC 3.6.3.19)                         | Substitution   | 1                   |                 |     |        | A                        | 1,720,316 | 1,720,316 | 1      | SNP (transition)   | 0.01                                 | G -> E                  | 107             |
| Mobile element protein                                                                           | Extension      | 0                   |                 |     | 1      |                          | 2,009,932 | 2,010,177 | 246    | Deletion           | 0.1                                  |                         | 1               |
| Multidrug transporter MdtC                                                                       | Substitution   | 1                   |                 |     |        | T                        | 4,957,204 | 4,957,204 | 1      | SNP (transversion) | 0.01                                 | A -> S                  | 2,824           |
| Possible hydrolase or acyltransferase RutD in<br>novel pyrimidine catabolism pathway             | Substitution   | 1                   |                 |     |        | A                        | 3,380,073 | 3,380,073 | 1      | SNP (transversion) | 0.01                                 | G -> V                  | 260             |
| PTS system, chitobiose-specific IIB<br>component (EC 2.7.1.69)                                   | Substitution   | 1                   |                 |     |        | C                        | 3,578,257 | 3,578,257 | 1      | SNP (transition)   | 0.01                                 | V -> A                  | 314             |
| Putative cytoplasmic protein USSDB7A                                                             | Substitution   | 1                   |                 |     |        | T                        | 3,790,507 | 3,790,507 | 1      | SNP (transition)   | 0.01                                 | L -> F                  | 259             |
| Putative major fimbrial subunit                                                                  | Substitution   | 1                   |                 |     |        | C                        | 1,777,298 | 1,777,298 | 1      | SNP (transversion) | 0.01                                 | Q -> P                  | 413             |
| Putative membrane protein                                                                        | Substitution   | 1                   |                 |     |        | A                        | 663,835   | 663,835   | 1      | SNP (transition)   | 0.01                                 | A -> V                  | 50              |
| Redox-sensing transcriptional regulator QorR                                                     | Frame Shift    | 0                   |                 |     | 1      | C                        | 1,907,721 | 1,907,720 | 0      | Insertion          | 0.01                                 |                         | 288             |
| Respiratory nitrate reductase alpha chain (EC<br>1.7.99.4)                                       | Substitution   | 1                   |                 |     |        | G                        | 4,613,705 | 4,613,705 | 1      | SNP (transversion) | 0.01                                 | I -> L                  | 2,866           |
| Ribose ABC transport system, permease<br>protein RbsC (TC 3.A.1.2.1)                             | Substitution   | 0                   |                 | 1   |        | TC                       | 2,907,748 | 2,907,749 | 2      | Substitution       | 0.01                                 | L -> S                  | 826             |



|              | BR21 reference | BR7<br>nucleotide<br>identity | %<br>nucleotide<br>identity<br>BR21 v BR7 |
|--------------|----------------|-------------------------------|-------------------------------------------|
| Length LCB 1 | 5,262,336      |                               |                                           |
| Length LCB 2 | 38,801         |                               |                                           |
|              | 5,301,137      | 5,301,069                     | 99.9987%                                  |

**BR7 vs 2h-, 8h-imipenem-exposed samples:**

|                 |      |
|-----------------|------|
| BR7, 2h-exposed | none |
| BR7, 8h-exposed | none |

**BR21 vs 2h-, 8h-imipenem-exposed samples:**

|                  |                                            |
|------------------|--------------------------------------------|
| BR21, 2h-exposed | none                                       |
| BR21, 8h-exposed | IS1 insertion, <i>ompK36</i> coding region |

Table S3. Differentially expressed genes (FDR < 0.05) due to lethal IPM exposure of 2h- and 8h-exposed samples of heteroresistant KPC-producing *K.pneumoniae* strains. Chromosomal and Plasmid-borne genes are shown separately. Raw reads by sample are shown at the bottom of the tables.

| Chromosomal Genes (Plasmid-borne genes listed separately below)                   | SEED CATEGORY               | SEED SUBCATEGORY             | BR7-2h- | BR7-2h- | BR21-2h- | BR21-2h- | BR7-8h- | BR7-8h- | BR21-8h- | BR21-8h- |
|-----------------------------------------------------------------------------------|-----------------------------|------------------------------|---------|---------|----------|----------|---------|---------|----------|----------|
|                                                                                   |                             |                              | up      | down    | up       | down     | up      | down    | up       | down     |
| 2,4-dihydroxyhept-2-ene-1,7-dioic acid aldolase (EC 4.1.2.-)                      | Amino Acids and Derivatives | Aromatic amino acids and     | 0       | 0       | 0        | 0        | 1       | 0       | 1        | 0        |
| 3,4-dihydroxyphenylacetate 2,3-dioxygenase (EC 1.13.11.15)                        | Amino Acids and Derivatives | Aromatic amino acids and     | 0       | 0       | 0        | 0        | 1       | 0       | 1        | 0        |
| 4-aminobutyraldehyde dehydrogenase (EC 1.2.1.19)                                  | Amino Acids and Derivatives | Arginine; urea cycle, polyam | 0       | 0       | 0        | 0        | 1       | 0       | 1        | 0        |
| 4-hydroxyphenylpyruvate dioxygenase (EC 1.13.11.27)                               | Amino Acids and Derivatives | Aromatic amino acids and     | 0       | 0       | 0        | 0        | 1       | 0       | 0        | 0        |
| 5-carboxymethyl-2-hydroxymuconate delta-isomerase (EC 5.3.3.10)                   | Amino Acids and Derivatives | Aromatic amino acids and     | 0       | 0       | 0        | 0        | 0       | 0       | 1        | 0        |
| 5-carboxymethyl-2-hydroxymuconate semialdehyde dehydrogenase (EC 1.2.1.60)        | Amino Acids and Derivatives | Aromatic amino acids and     | 1       | 0       | 0        | 0        | 1       | 0       | 1        | 0        |
| 5-carboxymethyl-2-oxo-hex-3- ene-1,7-dioate decarboxylase (EC 4.1.1.68) / 2-hydro | Amino Acids and Derivatives | Aromatic amino acids and     | 1       | 0       | 0        | 0        | 1       | 0       | 1        | 0        |
| 5-methyltetrahydropteroyltriglutamate-- homocysteine methyltransferase (EC 2.1    | Amino Acids and Derivatives | Lysine, threonine, methion   | 0       | 0       | 0        | 0        | 0       | 0       | 1        | 0        |
| Acetolactate synthase small subunit (EC 2.2.1.6)                                  | Amino Acids and Derivatives | Branched-chain amino acid    | 0       | 0       | 0        | 0        | 0       | 0       | 1        | 0        |
| Acetylglutamate kinase (EC 2.7.2.8)                                               | Amino Acids and Derivatives | Arginine; urea cycle, polyam | 0       | 0       | 0        | 0        | 0       | 0       | 1        | 0        |
| Acetylmethionine aminotransferase (EC 2.6.1.11)                                   | Amino Acids and Derivatives | Arginine; urea cycle, polyam | 0       | 0       | 0        | 0        | 0       | 0       | 1        | 0        |
| Adenylylsulfate kinase (EC 2.7.1.25)                                              | Amino Acids and Derivatives | Lysine, threonine, methion   | 0       | 1       | 0        | 0        | 0       | 0       | 0        | 0        |
| Alpha-ketoglutarate permease                                                      | Amino Acids and Derivatives | Glutamine, glutamate, asp    | 1       | 0       | 0        | 0        | 1       | 0       | 1        | 0        |
| Aminomethyltransferase (glycine cleavage system T protein) (EC 2.1.2.10)          | Amino Acids and Derivatives | Alanine, serine, and glycine | 0       | 0       | 1        | 0        | 0       | 0       | 1        | 0        |
| Anthranilate synthase, amidotransferase component (EC 4.1.3.27)                   | Amino Acids and Derivatives | Aromatic amino acids and     | 0       | 0       | 0        | 0        | 0       | 0       | 1        | 0        |
| Anthranilate synthase, aminase component (EC 4.1.3.27)                            | Amino Acids and Derivatives | Aromatic amino acids and     | 0       | 0       | 0        | 0        | 0       | 0       | 1        | 0        |
| Arginine ABC transporter, ATP-binding protein ArtP                                | Amino Acids and Derivatives | Arginine; urea cycle, polyam | 0       | 0       | 0        | 0        | 0       | 0       | 1        | 0        |
| Arginine ABC transporter, periplasmic arginine-binding protein ArtJ               | Amino Acids and Derivatives | Arginine; urea cycle, polyam | 0       | 0       | 0        | 0        | 0       | 0       | 1        | 0        |
| Arginine exporter protein ArgO                                                    | Amino Acids and Derivatives | Arginine; urea cycle, polyam | 0       | 0       | 0        | 0        | 0       | 0       | 1        | 0        |
| Arginine N-succinyltransferase (EC 2.3.1.109); AstA                               | Amino Acids and Derivatives | Arginine; urea cycle, polyam | 1       | 0       | 1        | 0        | 1       | 0       | 1        | 0        |
| AroM protein                                                                      | Amino Acids and Derivatives | Aromatic amino acids and     | 0       | 0       | 0        | 0        | 0       | 0       | 1        | 0        |
| Aromatic amino acid transport protein AroP                                        | Amino Acids and Derivatives | Aromatic amino acids and     | 0       | 0       | 0        | 0        | 1       | 0       | 1        | 0        |
| Asparagine synthetase [glutamine-hydrolyzing] (EC 6.3.5.4)                        | Amino Acids and Derivatives | Glutamine, glutamate, asp    | 0       | 0       | 0        | 1        | 0       | 0       | 0        | 1        |
| Aspartate--ammonia ligase (EC 6.3.1.1); asnA                                      | Amino Acids and Derivatives | Glutamine, glutamate, asp    | 0       | 0       | 0        | 1        | 0       | 1       | 0        | 1        |
| Aspartokinase (EC 2.7.2.4) / Homoserine dehydrogenase (EC 1.1.1.3)                | Amino Acids and Derivatives | Lysine, threonine, methion   | 0       | 0       | 0        | 0        | 0       | 0       | 0        | 1        |
| Biosynthetic Aromatic amino acid aminotransferase alpha (EC 2.6.1.57)             | Amino Acids and Derivatives | Aromatic amino acids and     | 0       | 0       | 0        | 0        | 1       | 0       | 0        | 0        |
| COG2907: Amine oxidase, flavin-containing                                         | Amino Acids and Derivatives | Arginine; urea cycle, polyam | 0       | 0       | 0        | 0        | 0       | 0       | 0        | 1        |
| Conserved hypothetical protein (perhaps related to histidine degradation)         | Amino Acids and Derivatives | Histidine Metabolism         | 0       | 0       | 0        | 0        | 1       | 0       | 1        | 0        |
| Cysteine desulfurase (EC 2.8.1.7), SufS subfamily                                 | Amino Acids and Derivatives | Alanine, serine, and glycine | 0       | 0       | 0        | 0        | 0       | 0       | 1        | 0        |
| Cytosine deaminase (EC 3.5.4.1)                                                   | Amino Acids and Derivatives | Amino Acids and Derivatives  | 0       | 0       | 0        | 0        | 1       | 0       | 0        | 0        |
| Diaminobutyrate--2-oxoglutarate aminotransferase (EC 2.6.1.76)                    | Amino Acids and Derivatives | Polyamines                   | 0       | 0       | 0        | 0        | 0       | 1       | 0        | 1        |
| Diaminopimelate decarboxylase (EC 4.1.1.20)                                       | Amino Acids and Derivatives | Lysine, threonine, methion   | 0       | 0       | 0        | 0        | 1       | 0       | 0        | 0        |
| Diaminopimelate epimerase (EC 5.1.1.7)                                            | Amino Acids and Derivatives | Lysine, threonine, methion   | 0       | 0       | 0        | 0        | 0       | 0       | 0        | 1        |
| D-serine deaminase (EC 4.3.1.18)                                                  | Amino Acids and Derivatives | Alanine, serine, and glycine | 0       | 0       | 0        | 0        | 0       | 0       | 1        | 0        |
| D-serine dehydratase (EC 4.3.1.18)                                                | Amino Acids and Derivatives | Alanine, serine, and glycine | 0       | 0       | 0        | 0        | 0       | 1       | 0        | 1        |
| D-serine dehydratase transcriptional activator                                    | Amino Acids and Derivatives | Alanine, serine, and glycine | 0       | 0       | 0        | 0        | 0       | 0       | 0        | 1        |
| D-serine permease DsdX                                                            | Amino Acids and Derivatives | Alanine, serine, and glycine | 1       | 0       | 0        | 0        | 0       | 0       | 0        | 1        |
| D-serine/D-alanine/glycine transporter                                            | Amino Acids and Derivatives | Alanine, serine, and glycine | 1       | 0       | 0        | 0        | 1       | 0       | 1        | 0        |
| FIG002283: Isochorismatase family protein                                         | Amino Acids and Derivatives | Aromatic amino acids and     | 0       | 0       | 0        | 0        | 0       | 0       | 1        | 0        |
| Formiminoglutamate (EC 3.5.3.8)                                                   | Amino Acids and Derivatives | Histidine Metabolism         | 0       | 0       | 0        | 0        | 1       | 0       | 1        | 0        |
| gamma-aminobutyrate (GABA) permease; GabP                                         | Amino Acids and Derivatives | Arginine; urea cycle, polyam | 1       | 0       | 0        | 0        | 1       | 0       | 1        | 0        |
| Gamma-aminobutyrate:alpha-ketoglutarate aminotransferase, GabT (EC 2.6.1.19)      | Amino Acids and Derivatives | Arginine; urea cycle, polyam | 0       | 0       | 0        | 0        | 1       | 0       | 1        | 0        |
| Gamma-glutamyl-aminobutyraldehyde dehydrogenase (EC 1.2.1.-); puuC/GabD           | Amino Acids and Derivatives | Arginine; urea cycle, polyam | 1       | 0       | 1        | 0        | 1       | 0       | 1        | 0        |
| Gamma-glutamyl-GABA hydrolase (EC 3.5.1.94); PuuD                                 | Amino Acids and Derivatives | Arginine; urea cycle, polyam | 1       | 0       | 0        | 0        | 1       | 0       | 1        | 0        |
| Gamma-glutamyl-putrescine oxidase (EC1.4.3.-); PuuB                               | Amino Acids and Derivatives | Arginine; urea cycle, polyam | 1       | 0       | 0        | 0        | 1       | 0       | 1        | 0        |
| Gamma-glutamyl-putrescine synthetase (EC 6.3.1.11); PuuA                          | Amino Acids and Derivatives | Arginine; urea cycle, polyam | 1       | 0       | 0        | 0        | 1       | 0       | 1        | 0        |
| Glutamate Aspartate periplasmic binding protein precursor GltI (TC 3.A.1.3.4)     | Amino Acids and Derivatives | Glutamine, glutamate, asp    | 1       | 0       | 0        | 0        | 1       | 0       | 1        | 0        |
| Glutamate Aspartate transport ATP-binding protein GltL (TC 3.A.1.3.4)             | Amino Acids and Derivatives | Glutamine, glutamate, asp    | 1       | 0       | 0        | 0        | 1       | 0       | 1        | 0        |



| Chromosomal Genes (Plasmid-borne genes listed separately below)                    | SEED CATEGORY               | SEED SUBCATEGORY             | BR7-2h- | BR7-2h- | BR21-2h- | BR21-2h- | BR7-8h- | BR7-8h- | BR21-8h- | BR21-8h- |
|------------------------------------------------------------------------------------|-----------------------------|------------------------------|---------|---------|----------|----------|---------|---------|----------|----------|
|                                                                                    |                             |                              | up      | down    | up       | down     | up      | down    | up       | down     |
| Glutamate Aspartate transport system permease protein GltJ (TC 3.A.1.3.4)          | Amino Acids and Derivatives | Glutamine, glutamate, asp:   | 1       | 0       | 0        | 0        | 1       | 0       | 1        | 0        |
| Glutamate Aspartate transport system permease protein GltK (TC 3.A.1.3.4)          | Amino Acids and Derivatives | Glutamine, glutamate, asp:   | 1       | 0       | 0        | 0        | 1       | 0       | 1        | 0        |
| Glutamate racemase (EC 5.1.1.3)                                                    | Amino Acids and Derivatives | Glutamine, glutamate, asp:   | 0       | 0       | 0        | 0        | 0       | 0       | 0        | 1        |
| Glutamate transport ATP-binding protein (aka glnQ)                                 | Amino Acids and Derivatives | Glutamine, glutamate, asp:   | 0       | 0       | 0        | 0        | 1       | 0       | 0        | 0        |
| Glutamine synthetase type I (EC 6.3.1.2)                                           | Amino Acids and Derivatives | Glutamine, glutamate, asp:   | 0       | 0       | 0        | 0        | 0       | 1       | 0        | 1        |
| Glycine cleavage system H protein                                                  | Amino Acids and Derivatives | Alanine, serine, and glycine | 0       | 0       | 0        | 0        | 0       | 0       | 1        | 0        |
| Glycine dehydrogenase [decarboxylating] (glycine cleavage system P protein) (EC 1  | Amino Acids and Derivatives | Alanine, serine, and glycine | 0       | 0       | 0        | 0        | 0       | 0       | 1        | 0        |
| Histidine ABC transporter, ATP-binding protein HisP (TC 3.A.1.3.1)                 | Amino Acids and Derivatives | Arginine; urea cycle, polyai | 0       | 0       | 0        | 0        | 1       | 0       | 0        | 0        |
| Histidine ammonia-lyase (EC 4.3.1.3)                                               | Amino Acids and Derivatives | Histidine Metabolism         | 1       | 0       | 1        | 0        | 1       | 0       | 1        | 0        |
| Histidine transport protein (permease)                                             | Amino Acids and Derivatives | Histidine Metabolism         | 1       | 0       | 0        | 0        | 1       | 0       | 1        | 0        |
| Histidine utilization repressor                                                    | Amino Acids and Derivatives | Histidine Metabolism         | 0       | 0       | 0        | 0        | 0       | 0       | 1        | 0        |
| Homoserine kinase (EC 2.7.1.39)                                                    | Amino Acids and Derivatives | Lysine, threonine, methion   | 0       | 0       | 0        | 0        | 0       | 0       | 0        | 1        |
| Imidazolonepropionase (EC 3.5.2.7)                                                 | Amino Acids and Derivatives | Histidine Metabolism         | 0       | 0       | 0        | 0        | 1       | 0       | 1        | 0        |
| Indole-3-glycerol phosphate synthase (EC 4.1.1.48)                                 | Amino Acids and Derivatives | Aromatic amino acids and     | 0       | 0       | 0        | 0        | 0       | 0       | 1        | 0        |
| Isochorismate synthase (EC 5.4.4.2) of siderophore biosynthesis; entC              | Amino Acids and Derivatives | Aromatic amino acids and     | 0       | 0       | 1        | 0        | 0       | 1       | 1        | 0        |
| Ketol-acid reductoisomerase (EC 1.1.1.86)                                          | Amino Acids and Derivatives | Branched-chain amino acid    | 0       | 1       | 0        | 0        | 0       | 1       | 0        | 1        |
| L-2,4-diaminobutyrate decarboxylase (EC 4.1.1.86)                                  | Amino Acids and Derivatives | Polyamines                   | 0       | 0       | 0        | 0        | 0       | 1       | 0        | 1        |
| L-asparagine permease                                                              | Amino Acids and Derivatives | Glutamine, glutamate, asp:   | 0       | 0       | 0        | 0        | 0       | 0       | 1        | 0        |
| L-threonine transporter, anaerobically inducible                                   | Amino Acids and Derivatives | Lysine, threonine, methion   | 0       | 0       | 0        | 0        | 0       | 0       | 1        | 0        |
| Lysine/cadaverine antiporter membrane protein CadB                                 | Amino Acids and Derivatives | Lysine, threonine, methion   | 0       | 0       | 0        | 0        | 0       | 0       | 0        | 1        |
| Lysine-arginine-ornithine-binding periplasmic protein precursor (TC 3.A.1.3.1)     | Amino Acids and Derivatives | Arginine; urea cycle, polyai | 1       | 0       | 0        | 0        | 1       | 0       | 1        | 0        |
| Methionine synthase II (cobalamin-independent)                                     | Amino Acids and Derivatives | Lysine, threonine, methion   | 0       | 0       | 0        | 0        | 0       | 0       | 1        | 0        |
| Monoamine oxidase (1.4.3.4)                                                        | Amino Acids and Derivatives | Lysine, threonine, methion   | 0       | 0       | 0        | 0        | 0       | 0       | 1        | 0        |
| N-acetyl-gamma-glutamyl-phosphate reductase (EC 1.2.1.38)                          | Amino Acids and Derivatives | Arginine; urea cycle, polyai | 0       | 0       | 0        | 0        | 0       | 0       | 1        | 0        |
| NADP/NAD-specific glutamate dehydrogenase (EC 1.4.1.2)(EC 1.4.1.4)                 | Amino Acids and Derivatives | Glutamine, glutamate, asp:   | 1       | 0       | 1        | 0        | 1       | 0       | 1        | 0        |
| Predicted chaperone lipoprotein YacC, potentially involved in protein secretion    | Amino Acids and Derivatives | Arginine; urea cycle, polyai | 0       | 0       | 0        | 0        | 0       | 0       | 0        | 1        |
| Predicted glutamine amidotransferase                                               | Amino Acids and Derivatives | Glutamine, glutamate, asp:   | 0       | 0       | 0        | 0        | 0       | 0       | 0        | 1        |
| Proline/sodium symporter PutP (TC 2.A.21.2.1)                                      | Amino Acids and Derivatives | Proline and 4-hydroxyproli   | 1       | 0       | 0        | 0        | 1       | 0       | 1        | 0        |
| Proline-specific permease proY                                                     | Amino Acids and Derivatives | Proline and 4-hydroxyproli   | 0       | 0       | 0        | 0        | 0       | 0       | 0        | 1        |
| Putative alanine/glycine transport protein                                         | Amino Acids and Derivatives | Alanine, serine, and glycine | 0       | 0       | 0        | 0        | 0       | 1       | 0        | 1        |
| Putrescine ABC transporter putrescine-binding protein PotF (TC 3.A.1.11.2)         | Amino Acids and Derivatives | Arginine; urea cycle, polyai | 0       | 0       | 0        | 0        | 1       | 0       | 1        | 0        |
| Putrescine aminotransferase (EC 2.6.1.82); patA                                    | Amino Acids and Derivatives | Arginine; urea cycle, polyai | 0       | 0       | 0        | 0        | 1       | 0       | 1        | 0        |
| Putrescine transport ATP-binding protein PotG (TC 3.A.1.11.2)                      | Amino Acids and Derivatives | Arginine; urea cycle, polyai | 0       | 0       | 0        | 0        | 0       | 0       | 1        | 0        |
| Putrescine transport system permease protein PotH (TC 3.A.1.11.2)                  | Amino Acids and Derivatives | Arginine; urea cycle, polyai | 0       | 0       | 0        | 0        | 0       | 0       | 1        | 0        |
| Putrescine utilization regulator                                                   | Amino Acids and Derivatives | Arginine; urea cycle, polyai | 0       | 0       | 0        | 0        | 1       | 0       | 1        | 0        |
| Pyruvate dehydrogenase E1 component (EC 1.2.4.1)                                   | Amino Acids and Derivatives | Lysine, threonine, methion   | 0       | 0       | 0        | 0        | 0       | 1       | 0        | 1        |
| Siroheme synthase / Precorrin-2 oxidase (EC 1.3.1.76) / Sirohydrochlorin ferrochel | Amino Acids and Derivatives | Lysine, threonine, methion   | 0       | 0       | 0        | 0        | 0       | 0       | 0        | 1        |
| Sodium/glutamate symport protein                                                   | Amino Acids and Derivatives | Glutamine, glutamate, asp:   | 0       | 0       | 0        | 0        | 1       | 0       | 1        | 0        |
| Spermidine N1-acetyltransferase (EC 2.3.1.57)                                      | Amino Acids and Derivatives | Arginine; urea cycle, polyai | 0       | 0       | 0        | 0        | 0       | 1       | 0        | 0        |
| Succinylarginine dihydrolase (EC 3.5.3.23); AstB                                   | Amino Acids and Derivatives | Arginine; urea cycle, polyai | 1       | 0       | 0        | 0        | 1       | 0       | 1        | 0        |
| Succinylglutamate desuccinylase (EC 3.5.1.96); AstE                                | Amino Acids and Derivatives | Arginine; urea cycle, polyai | 1       | 0       | 0        | 0        | 1       | 0       | 1        | 0        |
| Succinylglutamic semialdehyde dehydrogenase (EC 1.2.1.71); AstD                    | Amino Acids and Derivatives | Arginine; urea cycle, polyai | 1       | 0       | 0        | 0        | 1       | 0       | 1        | 0        |
| Succinylornithine transaminase (EC 2.6.1.81); AstC                                 | Amino Acids and Derivatives | Arginine; urea cycle, polyai | 1       | 0       | 1        | 0        | 1       | 0       | 1        | 0        |
| Sulfate adenyltransferase subunit 1 (EC 2.7.7.4)                                   | Amino Acids and Derivatives | Lysine, threonine, methion   | 0       | 1       | 0        | 0        | 0       | 0       | 0        | 0        |
| Sulfate and thiosulfate import ATP-binding protein CysA (EC 3.6.3.25)              | Amino Acids and Derivatives | Lysine, threonine, methion   | 0       | 1       | 0        | 0        | 0       | 0       | 0        | 0        |
| Sulfate permease                                                                   | Amino Acids and Derivatives | Lysine, threonine, methion   | 0       | 0       | 1        | 0        | 0       | 0       | 1        | 0        |
| Threonine dehydratase, catabolic (EC 4.3.1.19) TdcB                                | Amino Acids and Derivatives | Lysine, threonine, methion   | 0       | 0       | 0        | 0        | 0       | 0       | 1        | 0        |
| Trans-aconitate 2-methyltransferase (EC 2.1.1.144)                                 | Amino Acids and Derivatives | Lysine, threonine, methion   | 0       | 0       | 0        | 0        | 0       | 0       | 1        | 0        |
| Transcriptional regulator GabR of GABA utilization (GntR family with aminotransfer | Amino Acids and Derivatives | Lysine, threonine, methion   | 1       | 0       | 1        | 0        | 1       | 0       | 1        | 0        |
| Transcriptional repressor of PutA and PutP                                         | Amino Acids and Derivatives | Proline and 4-hydroxyproli   | 1       | 0       | 0        | 0        | 1       | 0       | 1        | 0        |

|                                                                              | SEED CATEGORY               | SEED SUBCATEGORY             | BR7-2h- | BR7-2h- | BR21-2h- | BR21-2h- | BR7-8h- | BR7-8h- | BR21-8h- | BR21-8h- |
|------------------------------------------------------------------------------|-----------------------------|------------------------------|---------|---------|----------|----------|---------|---------|----------|----------|
|                                                                              |                             |                              | up      | down    | up       | down     | up      | down    | up       | down     |
| Chromosomal Genes (Plasmid-borne genes listed separately below)              |                             |                              |         |         |          |          |         |         |          |          |
| Tryptophan synthase alpha chain (EC 4.2.1.20)                                | Amino Acids and Derivatives | Aromatic amino acids and     | 0       | 0       | 0        | 0        | 0       | 0       | 1        | 0        |
| Tryptophan synthase beta chain (EC 4.2.1.20)                                 | Amino Acids and Derivatives | Aromatic amino acids and     | 0       | 0       | 0        | 0        | 0       | 0       | 1        | 0        |
| Urease gamma subunit (EC 3.5.1.5)                                            | Amino Acids and Derivatives | Arginine; urea cycle, polyam | 0       | 0       | 0        | 0        | 1       | 0       | 0        | 0        |
| Urocanate hydratase (EC 4.2.1.49)                                            | Amino Acids and Derivatives | Histidine Metabolism         | 1       | 0       | 0        | 0        | 1       | 0       | 1        | 0        |
| 1,4-alpha-glucan (glycogen) branching enzyme, GH-13-type (EC 2.4.1.18)       | Carbohydrates               | Polysaccharides              | 0       | 0       | 0        | 0        | 0       | 0       | 1        | 0        |
| 1-phosphofructokinase (EC 2.7.1.56)                                          | Carbohydrates               | Monosaccharides              | 0       | 0       | 1        | 0        | 0       | 0       | 1        | 0        |
| 2-(5"-triphosphoribosyl)-3'-dephosphocoenzyme- A synthase (EC 2.7.8.25)      | Carbohydrates               | Central carbohydrate met     | 0       | 0       | 0        | 0        | 1       | 0       | 0        | 0        |
| 2,3-bisphosphoglycerate-independent phosphoglycerate mutase (EC 5.4.2.1)     | Carbohydrates               | Central carbohydrate met     | 0       | 0       | 0        | 0        | 0       | 0       | 0        | 1        |
| 2,4-dienoyl-CoA reductase [NADPH] (EC 1.3.1.34)                              | Carbohydrates               | Central carbohydrate met     | 0       | 0       | 0        | 0        | 0       | 0       | 1        | 0        |
| 2-dehydro-3-deoxyglucarate aldolase (EC 4.1.2.20)                            | Carbohydrates               | Monosaccharides              | 0       | 1       | 0        | 0        | 0       | 0       | 0        | 0        |
| 2-dehydro-3-deoxy-L-rhamnonate aldolase (EC 4.1.2.n3)                        | Carbohydrates               | Carbohydrates - no subcat    | 0       | 0       | 0        | 0        | 0       | 0       | 1        | 0        |
| 2-ketogluconate 6-phosphate reductase (EC 1.1.1.43)                          | Carbohydrates               | Monosaccharides              | 0       | 0       | 0        | 0        | 1       | 0       | 0        | 0        |
| 2-ketogluconate kinase (EC 2.7.1.13)                                         | Carbohydrates               | Monosaccharides              | 0       | 0       | 0        | 0        | 1       | 0       | 0        | 0        |
| 2-ketogluconate transporter                                                  | Carbohydrates               | Monosaccharides              | 0       | 0       | 0        | 0        | 1       | 0       | 1        | 0        |
| 2-oxoglutarate dehydrogenase E1 component (EC 1.2.4.2)                       | Carbohydrates               | Central carbohydrate met     | 0       | 0       | 0        | 0        | 0       | 0       | 1        | 0        |
| 2-oxoglutarate/malate translocator                                           | Carbohydrates               | Central carbohydrate met     | 0       | 0       | 1        | 0        | 0       | 0       | 1        | 0        |
| 4-alpha-glucanotransferase (amylomaltase) (EC 2.4.1.25)                      | Carbohydrates               | Di- and oligosaccharides     | 0       | 0       | 0        | 0        | 0       | 0       | 0        | 1        |
| 5-deoxy-glucuronate isomerase (EC 5.3.1.-)                                   | Carbohydrates               | Sugar alcohols               | 0       | 0       | 0        | 0        | 0       | 0       | 1        | 0        |
| 6-phosphofructokinase (EC 2.7.1.11)                                          | Carbohydrates               | Central carbohydrate met     | 0       | 0       | 0        | 0        | 0       | 0       | 0        | 1        |
| 6-phosphofructokinase class II (EC 2.7.1.11); pfkB (FDP)                     | Carbohydrates               | Central carbohydrate met     | 0       | 0       | 0        | 0        | 0       | 0       | 1        | 0        |
| Acetaldehyde dehydrogenase (EC 1.2.1.10)                                     | Carbohydrates               | Central carbohydrate met     | 0       | 0       | 0        | 0        | 0       | 0       | 0        | 1        |
| Acetaldehyde dehydrogenase, ethanolamine utilization cluster (EC 1.2.1.10)   | Carbohydrates               | Sugar alcohols               | 0       | 0       | 0        | 0        | 0       | 0       | 1        | 0        |
| Acetate kinase (EC 2.7.2.1); ackA                                            | Carbohydrates               | Sugar alcohols               | 0       | 0       | 0        | 0        | 0       | 1       | 0        | 1        |
| Acetate operon repressor                                                     | Carbohydrates               | Central carbohydrate met     | 0       | 0       | 0        | 0        | 1       | 0       | 0        | 0        |
| Acetate permease ActP (cation/acetate symporter)                             | Carbohydrates               | Central carbohydrate met     | 1       | 0       | 0        | 0        | 1       | 0       | 1        | 0        |
| Acetolactate synthase, catabolic (EC 2.2.1.6)                                | Carbohydrates               | Organic acids                | 0       | 0       | 0        | 0        | 0       | 0       | 0        | 1        |
| Acetyl-CoA acetyltransferase (EC 2.3.1.9)                                    | Carbohydrates               | One-carbon Metabolism        | 0       | 0       | 0        | 0        | 0       | 0       | 1        | 0        |
| Acetyl-CoA:acetoacetyl-CoA transferase, alpha subunit (EC 2.8.3.8)           | Carbohydrates               | Fermentation                 | 0       | 0       | 0        | 0        | 1       | 0       | 1        | 0        |
| Acetyl-coenzyme A synthetase (EC 6.2.1.1)                                    | Carbohydrates               | Central carbohydrate met     | 1       | 0       | 0        | 0        | 1       | 0       | 1        | 0        |
| acetyltransferase, GNAT family                                               | Carbohydrates               | Central carbohydrate met     | 0       | 0       | 0        | 0        | 1       | 0       | 0        | 0        |
| Aconitate hydratase (EC 4.2.1.3)                                             | Carbohydrates               | Central carbohydrate met     | 0       | 0       | 0        | 0        | 1       | 0       | 1        | 0        |
| Aconitate hydratase 2 (EC 4.2.1.3)                                           | Carbohydrates               | Central carbohydrate met     | 0       | 0       | 0        | 0        | 0       | 0       | 1        | 0        |
| Aerobic glycerol-3-phosphate dehydrogenase (EC 1.1.5.3); GlpD                | Carbohydrates               | Sugar alcohols               | 1       | 0       | 1        | 0        | 0       | 0       | 0        | 0        |
| Alanine racemase (EC 5.1.1.1)##catabolic                                     | Carbohydrates               | Central carbohydrate met     | 1       | 0       | 0        | 0        | 1       | 0       | 1        | 0        |
| Alcohol dehydrogenase (EC 1.1.1.1)                                           | Carbohydrates               | Fermentation                 | 0       | 0       | 0        | 0        | 1       | 0       | 1        | 0        |
| Aldehyde dehydrogenase (EC 1.2.1.3); patD?                                   | Carbohydrates               | Central carbohydrate met     | 1       | 0       | 0        | 0        | 0       | 0       | 1        | 0        |
| Aldehyde dehydrogenase A (EC 1.2.1.22); gabD                                 | Carbohydrates               | Central carbohydrate met     | 0       | 0       | 0        | 0        | 1       | 0       | 1        | 0        |
| Aldehyde dehydrogenase B (EC 1.2.1.22)                                       | Carbohydrates               | Central carbohydrate met     | 0       | 0       | 0        | 0        | 1       | 0       | 1        | 0        |
| Aldo-keto reductase                                                          | Carbohydrates               | Monosaccharides              | 0       | 0       | 0        | 0        | 0       | 0       | 1        | 0        |
| Aldose 1-epimerase (EC 5.1.3.3)                                              | Carbohydrates               | Di- and oligosaccharides     | 0       | 1       | 0        | 0        | 0       | 1       | 0        | 1        |
| Alpha,alpha-trehalose-phosphate synthase [UDP-forming] (EC 2.4.1.15)         | Carbohydrates               | Di- and oligosaccharides     | 0       | 0       | 0        | 0        | 0       | 0       | 1        | 0        |
| Alpha-acetolactate decarboxylase (EC 4.1.1.5)                                | Carbohydrates               | Organic acids                | 0       | 0       | 0        | 0        | 0       | 0       | 0        | 1        |
| Alpha-galactosidase (EC 3.2.1.22)                                            | Carbohydrates               | Di- and oligosaccharides     | 0       | 0       | 0        | 0        | 1       | 0       | 1        | 0        |
| Arabinose-proton symporter                                                   | Carbohydrates               | Monosaccharides              | 0       | 1       | 0        | 0        | 0       | 1       | 0        | 1        |
| Ascorbate-specific PTS system, EIIC component                                | Carbohydrates               | Monosaccharides              | 0       | 0       | 0        | 0        | 1       | 0       | 1        | 0        |
| ATP:Cob(I)alamin adenosyltransferase (EC 2.5.1.17), ethanolamine utilization | Carbohydrates               | Sugar alcohols               | 0       | 0       | 0        | 0        | 0       | 0       | 1        | 0        |
| Beta-galactosidase (EC 3.2.1.23)                                             | Carbohydrates               | Di- and oligosaccharides     | 0       | 0       | 0        | 0        | 0       | 0       | 0        | 1        |
| Beta-glucosidase (EC 3.2.1.21)                                               | Carbohydrates               | Di- and oligosaccharides     | 0       | 0       | 0        | 0        | 1       | 0       | 1        | 0        |
| Beta-mannosidase (EC 3.2.1.25)                                               | Carbohydrates               | Monosaccharides              | 0       | 0       | 0        | 0        | 0       | 0       | 0        | 1        |
| Chitinase (EC 3.2.1.14)                                                      | Carbohydrates               | Aminosugars                  | 0       | 0       | 0        | 0        | 0       | 0       | 1        | 0        |

| Chromosomal Genes (Plasmid-borne genes listed separately below)                  | SEED CATEGORY | SEED SUBCATEGORY         | BR7-2h- | BR7-2h- | BR21-2h- | BR21-2h- | BR7-8h- | BR7-8h- | BR21-8h- | BR21-8h- |
|----------------------------------------------------------------------------------|---------------|--------------------------|---------|---------|----------|----------|---------|---------|----------|----------|
|                                                                                  |               |                          | up      | down    | up       | down     | up      | down    | up       | down     |
| Citrate lyase alpha chain (EC 4.1.3.6)                                           | Carbohydrates | Organic acids            | 0       | 0       | 0        | 0        | 1       | 0       | 0        | 0        |
| Citrate lyase beta chain (EC 4.1.3.6)                                            | Carbohydrates | Organic acids            | 0       | 0       | 0        | 0        | 1       | 0       | 0        | 0        |
| Citrate synthase (si) (EC 2.3.3.1)                                               | Carbohydrates | Central carbohydrate met | 0       | 0       | 0        | 0        | 1       | 0       | 1        | 0        |
| Cytoplasmic alpha-amylase (EC 3.2.1.1)                                           | Carbohydrates | Di- and oligosaccharides | 0       | 0       | 0        | 0        | 1       | 0       | 1        | 0        |
| D-amino acid dehydrogenase small subunit (EC 1.4.99.1)                           | Carbohydrates | Central carbohydrate met | 1       | 0       | 0        | 0        | 1       | 0       | 1        | 0        |
| D-arabinitol 4-dehydrogenase (EC 1.1.1.11)                                       | Carbohydrates | Sugar alcohols           | 0       | 0       | 0        | 0        | 1       | 0       | 1        | 0        |
| D-galactarate dehydratase (EC 4.2.1.42)                                          | Carbohydrates | Monosaccharides          | 0       | 1       | 0        | 0        | 0       | 1       | 0        | 0        |
| D-glucarate permease                                                             | Carbohydrates | Monosaccharides          | 0       | 1       | 0        | 0        | 0       | 1       | 0        | 0        |
| Dihydrolipoamide acetyltransferase component of pyruvate dehydrogenase comp      | Carbohydrates | Central carbohydrate met | 0       | 0       | 0        | 0        | 0       | 0       | 0        | 1        |
| Dihydrolipoamide succinyltransferase component (E2) of 2-oxoglutarate dehydrog   | Carbohydrates | Central carbohydrate met | 0       | 0       | 0        | 0        | 0       | 0       | 1        | 0        |
| D-lactate dehydrogenase (EC 1.1.1.28)                                            | Carbohydrates | Fermentation             | 0       | 0       | 0        | 0        | 0       | 1       | 0        | 1        |
| D-ribulokinase (EC 2.7.1.47)                                                     | Carbohydrates | Central carbohydrate met | 0       | 0       | 0        | 0        | 0       | 0       | 1        | 0        |
| D-xylose transport ATP-binding protein XylG                                      | Carbohydrates | Monosaccharides          | 0       | 0       | 0        | 0        | 1       | 0       | 1        | 0        |
| Endo-1,4-beta-xylanase A precursor (EC 3.2.1.8)                                  | Carbohydrates | Monosaccharides          | 0       | 0       | 0        | 0        | 1       | 0       | 1        | 0        |
| Endo-b1,4-mannanase 5C                                                           | Carbohydrates | Central carbohydrate met | 0       | 0       | 0        | 0        | 0       | 0       | 1        | 0        |
| Enolase (EC 4.2.1.11)                                                            | Carbohydrates | Central carbohydrate met | 0       | 0       | 0        | 0        | 0       | 0       | 0        | 1        |
| Enoyl-CoA hydratase (EC 4.2.1.17)                                                | Carbohydrates | Fermentation             | 1       | 0       | 0        | 0        | 1       | 0       | 1        | 0        |
| Epi-inositol hydrolase (EC 3.7.1.-)                                              | Carbohydrates | Sugar alcohols           | 0       | 0       | 0        | 0        | 0       | 0       | 1        | 0        |
| Epimerase KguE                                                                   | Carbohydrates | Monosaccharides          | 0       | 0       | 0        | 0        | 1       | 0       | 0        | 0        |
| Ethanolamine ammonia-lyase heavy chain (EC 4.3.1.7)                              | Carbohydrates | Sugar alcohols           | 0       | 0       | 0        | 0        | 1       | 0       | 1        | 0        |
| Ethanolamine ammonia-lyase light chain (EC 4.3.1.7)                              | Carbohydrates | Sugar alcohols           | 0       | 0       | 0        | 0        | 0       | 0       | 1        | 0        |
| Ethanolamine operon regulatory protein                                           | Carbohydrates | Sugar alcohols           | 0       | 0       | 0        | 0        | 0       | 0       | 1        | 0        |
| Ethanolamine permease                                                            | Carbohydrates | Sugar alcohols           | 0       | 0       | 0        | 0        | 0       | 0       | 1        | 0        |
| Ethanolamine utilization polyhedral-body-like protein EutL                       | Carbohydrates | Sugar alcohols           | 0       | 0       | 0        | 0        | 0       | 0       | 1        | 0        |
| Formate efflux transporter (TC 2.A.44 family)                                    | Carbohydrates | Fermentation             | 0       | 1       | 0        | 0        | 0       | 1       | 0        | 1        |
| Fructose-bisphosphate aldolase class I (EC 4.1.2.13)                             | Carbohydrates | Central carbohydrate met | 0       | 0       | 0        | 0        | 1       | 0       | 1        | 0        |
| Fumarate hydratase class I, aerobic (EC 4.2.1.2)                                 | Carbohydrates | Central carbohydrate met | 0       | 0       | 0        | 0        | 1       | 0       | 1        | 0        |
| Fumarate hydratase class I, anaerobic (EC 4.2.1.2)                               | Carbohydrates | One-carbon Metabolism    | 0       | 0       | 1        | 0        | 0       | 0       | 1        | 0        |
| Fumarate hydratase class II (EC 4.2.1.2)                                         | Carbohydrates | Central carbohydrate met | 0       | 0       | 0        | 0        | 1       | 0       | 1        | 0        |
| Galactitol utilization operon repressor                                          | Carbohydrates | Monosaccharides          | 0       | 0       | 0        | 0        | 0       | 0       | 0        | 1        |
| Galactokinase (EC 2.7.1.6)                                                       | Carbohydrates | Di- and oligosaccharides | 0       | 1       | 0        | 0        | 0       | 1       | 0        | 1        |
| Galactose/methyl galactoside ABC transport system, ATP-binding protein MglA (EC  | Carbohydrates | Di- and oligosaccharides | 0       | 0       | 0        | 0        | 1       | 0       | 1        | 0        |
| Galactose/methyl galactoside ABC transport system, D-galactose-binding periplas  | Carbohydrates | Di- and oligosaccharides | 0       | 0       | 0        | 0        | 0       | 0       | 1        | 0        |
| Galactose/methyl galactoside ABC transport system, permease protein MglC (TC 3   | Carbohydrates | Di- and oligosaccharides | 0       | 0       | 1        | 0        | 0       | 0       | 1        | 0        |
| Galactose-1-phosphate uridylyltransferase (EC 2.7.7.10)                          | Carbohydrates | Di- and oligosaccharides | 0       | 1       | 0        | 0        | 0       | 1       | 0        | 1        |
| Glucokinase, ROK family (EC 2.7.1.2)                                             | Carbohydrates | Di- and oligosaccharides | 0       | 0       | 0        | 0        | 0       | 0       | 1        | 0        |
| Gluconate 2-dehydrogenase (EC 1.1.99.3), membrane-bound, gamma subunit           | Carbohydrates | Monosaccharides          | 0       | 0       | 0        | 0        | 1       | 0       | 0        | 0        |
| Gluconate permease                                                               | Carbohydrates | Monosaccharides          | 0       | 0       | 0        | 0        | 0       | 0       | 1        | 0        |
| Glucose-1-phosphatase (EC 3.1.3.10)                                              | Carbohydrates | Polysaccharides          | 0       | 0       | 0        | 0        | 0       | 0       | 1        | 0        |
| Glucose-1-phosphate adenyltransferase (EC 2.7.7.27)                              | Carbohydrates | Polysaccharides          | 0       | 0       | 0        | 0        | 0       | 0       | 1        | 0        |
| Glucose-6-phosphate isomerase (EC 5.3.1.9);pgi                                   | Carbohydrates | Central carbohydrate met | 0       | 0       | 0        | 0        | 0       | 0       | 0        | 1        |
| Glyceraldehyde-3-phosphate ketol-isomerase (EC 5.3.1.1)                          | Carbohydrates | Sugar alcohols           | 0       | 0       | 0        | 0        | 0       | 0       | 1        | 0        |
| Glycerol kinase (EC 2.7.1.30); GlpK                                              | Carbohydrates | Sugar alcohols           | 0       | 0       | 1        | 0        | 0       | 0       | 1        | 0        |
| Glycerol-3-phosphate ABC transporter, ATP-binding protein UgpC (TC 3.A.1.1.3)    | Carbohydrates | Sugar alcohols           | 1       | 0       | 0        | 0        | 1       | 0       | 1        | 0        |
| Glycerol-3-phosphate ABC transporter, periplasmic glycerol-3-phosphate-binding p | Carbohydrates | Sugar alcohols           | 1       | 0       | 0        | 0        | 1       | 0       | 1        | 0        |
| Glycerol-3-phosphate ABC transporter, permease protein UgpA (TC 3.A.1.1.3)       | Carbohydrates | Sugar alcohols           | 1       | 0       | 0        | 0        | 1       | 0       | 1        | 0        |
| Glycerol-3-phosphate ABC transporter, permease protein UgpE (TC 3.A.1.1.3)       | Carbohydrates | Sugar alcohols           | 1       | 0       | 0        | 0        | 1       | 0       | 1        | 0        |
| Glycerol-3-phosphate transporter; GlpT                                           | Carbohydrates | Sugar alcohols           | 1       | 0       | 1        | 0        | 1       | 0       | 1        | 0        |
| Glycerophosphoryl diester phosphodiesterase, periplasmic (EC 3.1.4.46); GlpQ     | Carbohydrates | Sugar alcohols           | 1       | 0       | 1        | 0        | 1       | 0       | 1        | 0        |
| Glycogen debranching enzyme (EC 3.2.1.-)                                         | Carbohydrates | Di- and oligosaccharides | 0       | 0       | 0        | 0        | 0       | 0       | 1        | 0        |

|                                                                                      | SEED CATEGORY | SEED SUBCATEGORY          | BR7-2h- | BR7-2h- | BR21-2h- | BR21-2h- | BR7-8h- | BR7-8h- | BR21-8h- | BR21-8h- |
|--------------------------------------------------------------------------------------|---------------|---------------------------|---------|---------|----------|----------|---------|---------|----------|----------|
|                                                                                      |               |                           | up      | down    | up       | down     | up      | down    | up       | down     |
| Chromosomal Genes (Plasmid-borne genes listed separately below)                      |               |                           |         |         |          |          |         |         |          |          |
| Glycogen phosphorylase (EC 2.4.1.1)                                                  | Carbohydrates | Di- and oligosaccharides  | 0       | 0       | 0        | 0        | 1       | 0       | 1        | 0        |
| Glycogen synthase, ADP-glucose transglucosylase (EC 2.4.1.21)                        | Carbohydrates | Polysaccharides           | 0       | 0       | 0        | 0        | 1       | 0       | 1        | 0        |
| Glycolate dehydrogenase (EC 1.1.99.14), subunit GlcD                                 | Carbohydrates | Central carbohydrate met  | 0       | 0       | 0        | 0        | 0       | 0       | 1        | 0        |
| Glyoxalase family protein                                                            | Carbohydrates | Monosaccharides           | 1       | 0       | 0        | 0        | 1       | 0       | 1        | 0        |
| Hexose phosphate uptake regulatory protein UhpC                                      | Carbohydrates | Monosaccharides           | 0       | 0       | 0        | 0        | 0       | 1       | 0        | 0        |
| High-affinity gluconate transporter GntT                                             | Carbohydrates | Monosaccharides           | 0       | 0       | 1        | 0        | 0       | 0       | 1        | 0        |
| Hydroxypyruvate isomerase (EC 5.3.1.22)                                              | Carbohydrates | Organic acids             | 0       | 0       | 0        | 0        | 1       | 0       | 1        | 0        |
| Inositol transport system ATP-binding protein                                        | Carbohydrates | Sugar alcohols            | 1       | 0       | 0        | 0        | 1       | 0       | 1        | 0        |
| Inositol transport system permease protein                                           | Carbohydrates | Sugar alcohols            | 1       | 0       | 0        | 0        | 1       | 0       | 1        | 0        |
| Inositol transport system sugar-binding protein                                      | Carbohydrates | Sugar alcohols            | 0       | 0       | 0        | 0        | 1       | 0       | 1        | 0        |
| Inosose dehydratase (EC 4.2.1.44)                                                    | Carbohydrates | Sugar alcohols            | 0       | 0       | 0        | 0        | 0       | 0       | 1        | 0        |
| Inosose isomerase (EC 5.3.99.-)                                                      | Carbohydrates | Sugar alcohols            | 0       | 0       | 0        | 0        | 0       | 0       | 1        | 0        |
| Isocitrate dehydrogenase phosphatase (EC 2.7.11.5)/kinase (EC 3.1.3.-)               | Carbohydrates | Central carbohydrate met  | 0       | 0       | 0        | 0        | 1       | 0       | 1        | 0        |
| Isocitrate lyase (EC 4.1.3.1)                                                        | Carbohydrates | Central carbohydrate met  | 0       | 0       | 0        | 0        | 1       | 0       | 1        | 0        |
| Lactate-responsive regulator LldR in Enterobacteria, GntR family                     | Carbohydrates | Organic acids             | 1       | 0       | 0        | 0        | 1       | 0       | 1        | 0        |
| Lactose permease                                                                     | Carbohydrates | Di- and oligosaccharides  | 0       | 0       | 0        | 0        | 1       | 0       | 0        | 0        |
| Lactoylglutathione lyase and related lyases                                          | Carbohydrates | Monosaccharides           | 0       | 0       | 0        | 0        | 0       | 0       | 1        | 0        |
| L-arabinose isomerase (EC 5.3.1.4)                                                   | Carbohydrates | Monosaccharides           | 0       | 0       | 0        | 0        | 0       | 0       | 1        | 0        |
| L-arabinose transport ATP-binding protein AraG (TC 3.A.1.2.2)                        | Carbohydrates | Monosaccharides           | 0       | 0       | 0        | 0        | 0       | 0       | 1        | 0        |
| L-arabinose transport system permease protein (TC 3.A.1.2.2)                         | Carbohydrates | Monosaccharides           | 0       | 0       | 0        | 0        | 0       | 0       | 1        | 0        |
| L-arabinose-binding periplasmic protein precursor AraF (TC 3.A.1.2.2)                | Carbohydrates | Monosaccharides           | 0       | 0       | 0        | 0        | 0       | 0       | 1        | 0        |
| L-fucose isomerase (EC 5.3.1.25)                                                     | Carbohydrates | Monosaccharides           | 0       | 0       | 0        | 0        | 0       | 0       | 1        | 0        |
| L-fucose operon activator                                                            | Carbohydrates | Monosaccharides           | 0       | 0       | 0        | 0        | 0       | 0       | 1        | 0        |
| L-fuculokinase (EC 2.7.1.51)                                                         | Carbohydrates | Monosaccharides           | 0       | 0       | 0        | 0        | 0       | 0       | 1        | 0        |
| L-lactate permease                                                                   | Carbohydrates | Organic acids             | 1       | 0       | 0        | 0        | 1       | 0       | 1        | 0        |
| Low-affinity gluconate/H+ symporter GntU                                             | Carbohydrates | Monosaccharides           | 0       | 0       | 0        | 0        | 0       | 1       | 0        | 0        |
| L-rhamnonate dehydratase (EC 4.2.1.90)                                               | Carbohydrates | Carbohydrates - no subcat | 0       | 0       | 0        | 0        | 0       | 0       | 1        | 0        |
| L-rhamnonate transporter (predicted by genome context)                               | Carbohydrates | Carbohydrates - no subcat | 0       | 0       | 0        | 0        | 1       | 0       | 1        | 0        |
| Malate dehydrogenase (EC 1.1.1.37)                                                   | Carbohydrates | Central carbohydrate met  | 0       | 0       | 0        | 0        | 1       | 0       | 1        | 0        |
| Malate Na(+) symporter                                                               | Carbohydrates | Central carbohydrate met  | 0       | 0       | 0        | 0        | 0       | 0       | 1        | 0        |
| Malate synthase (EC 2.3.3.9)                                                         | Carbohydrates | Central carbohydrate met  | 0       | 0       | 0        | 0        | 1       | 0       | 1        | 0        |
| Malate:quinone oxidoreductase (EC 1.1.5.4)                                           | Carbohydrates | Central carbohydrate met  | 1       | 0       | 0        | 0        | 1       | 0       | 1        | 0        |
| Maltodextrin glucosidase (EC 3.2.1.20)                                               | Carbohydrates | Di- and oligosaccharides  | 0       | 0       | 0        | 0        | 0       | 0       | 0        | 1        |
| Maltodextrin phosphorylase (EC 2.4.1.1)                                              | Carbohydrates | Di- and oligosaccharides  | 0       | 0       | 0        | 0        | 0       | 0       | 0        | 1        |
| Maltoporin (maltose/maltodextrin high-affinity receptor, phage lambda receptor)      | Carbohydrates | Di- and oligosaccharides  | 0       | 0       | 0        | 0        | 1       | 0       | 0        | 1        |
| Maltose operon periplasmic protein MalM                                              | Carbohydrates | Di- and oligosaccharides  | 0       | 0       | 0        | 0        | 1       | 0       | 0        | 1        |
| Maltose/maltodextrin ABC transporter, permease protein MalF                          | Carbohydrates | Di- and oligosaccharides  | 0       | 0       | 0        | 0        | 0       | 0       | 0        | 1        |
| Maltose/maltodextrin ABC transporter, permease protein MalG                          | Carbohydrates | Di- and oligosaccharides  | 0       | 0       | 0        | 0        | 1       | 0       | 0        | 1        |
| Maltose/maltodextrin ABC transporter, substrate binding periplasmic protein MalE     | Carbohydrates | Di- and oligosaccharides  | 0       | 0       | 0        | 0        | 1       | 0       | 0        | 1        |
| Maltose/maltodextrin transport ATP-binding protein MalK (EC 3.6.3.19)                | Carbohydrates | Di- and oligosaccharides  | 0       | 0       | 0        | 0        | 1       | 0       | 0        | 1        |
| Maltose-6'-phosphate glucosidase (EC 3.2.1.122)                                      | Carbohydrates | Di- and oligosaccharides  | 0       | 0       | 0        | 0        | 1       | 0       | 1        | 0        |
| Melibiose carrier protein, Na+/melibiose symporter                                   | Carbohydrates | Di- and oligosaccharides  | 0       | 0       | 0        | 0        | 0       | 0       | 1        | 0        |
| Methylglyoxal reductase, acetol producing (EC 1.1.1.-) / 2,5-diketo-D-gluconate re   | Carbohydrates | Central carbohydrate met  | 0       | 0       | 0        | 0        | 1       | 0       | 1        | 0        |
| Methylglyoxal synthase (EC 4.2.3.3)                                                  | Carbohydrates | Central carbohydrate met  | 0       | 0       | 0        | 0        | 0       | 0       | 0        | 1        |
| Mgl repressor and galactose ultrainduction factor GalS, HTH-type transcriptional     | Carbohydrates | Di- and oligosaccharides  | 1       | 0       | 0        | 0        | 0       | 0       | 1        | 0        |
| Mlc, transcriptional repressor of MalT (the transcriptional activator of maltose reg | Carbohydrates | Di- and oligosaccharides  | 0       | 0       | 0        | 0        | 0       | 0       | 0        | 1        |
| Myo-inositol 2-dehydrogenase 1 (EC 1.1.1.18)                                         | Carbohydrates | Sugar alcohols            | 0       | 0       | 0        | 0        | 0       | 0       | 1        | 0        |
| NAD-dependent glyceraldehyde-3-phosphate dehydrogenase (EC 1.2.1.12)                 | Carbohydrates | Central carbohydrate met  | 0       | 0       | 0        | 0        | 0       | 0       | 0        | 1        |
| NADP-dependent malic enzyme (EC 1.1.1.40)                                            | Carbohydrates | Central carbohydrate met  | 0       | 0       | 0        | 0        | 0       | 0       | 1        | 0        |
| N-hydroxyarylamine O-acetyltransferase (EC 2.3.1.118)                                | Carbohydrates | Central carbohydrate met  | 0       | 0       | 0        | 0        | 0       | 0       | 1        | 0        |

|                                                                                      | SEED CATEGORY | SEED SUBCATEGORY          | BR7-2h- | BR7-2h- | BR21-2h- | BR21-2h- | BR7-8h- | BR7-8h- | BR21-8h- | BR21-8h- |
|--------------------------------------------------------------------------------------|---------------|---------------------------|---------|---------|----------|----------|---------|---------|----------|----------|
|                                                                                      |               |                           | up      | down    | up       | down     | up      | down    | up       | down     |
| Chromosomal Genes (Plasmid-borne genes listed separately below)                      |               |                           |         |         |          |          |         |         |          |          |
| Oxidoreductase                                                                       | Carbohydrates | Central carbohydrate met  | 0       | 0       | 0        | 0        | 0       | 0       | 1        | 0        |
| Peptide methionine sulfoxide reductase MsrB (EC 1.8.4.12)                            | Carbohydrates | Carbohydrates - no subcat | 1       | 0       | 0        | 0        | 1       | 0       | 1        | 0        |
| Periplasmic alpha-amylase (EC 3.2.1.1)                                               | Carbohydrates | Di- and oligosaccharides  | 0       | 0       | 0        | 0        | 1       | 0       | 0        | 1        |
| Periplasmic beta-glucosidase (EC 3.2.1.21)                                           | Carbohydrates | Di- and oligosaccharides  | 0       | 0       | 0        | 0        | 0       | 0       | 1        | 0        |
| Phenylacetate degradation enoyl-CoA hydratase PaaB (EC 4.2.1.17)                     | Carbohydrates | Central carbohydrate met  | 0       | 0       | 0        | 0        | 1       | 0       | 0        | 0        |
| Phenylacetate-CoA oxygenase, PaaG subunit                                            | Carbohydrates | Central carbohydrate met  | 0       | 0       | 0        | 0        | 1       | 0       | 1        | 0        |
| Phenylacetate-CoA oxygenase, PaaI subunit                                            | Carbohydrates | Central carbohydrate met  | 0       | 0       | 0        | 0        | 1       | 0       | 0        | 0        |
| Phenylacetate-coenzyme A ligase (EC 6.2.1.30) PaaF                                   | Carbohydrates | Central carbohydrate met  | 0       | 0       | 0        | 0        | 1       | 0       | 1        | 0        |
| Phosphatase NagD predicted to act in N-acetylglucosamine utilization subsystem       | Carbohydrates | Aminosugars               | 0       | 0       | 0        | 0        | 0       | 0       | 0        | 1        |
| Phosphate acetyltransferase (EC 2.3.1.8); pta                                        | Carbohydrates | Central carbohydrate met  | 0       | 0       | 0        | 0        | 0       | 0       | 0        | 1        |
| Phosphoenolpyruvate carboxykinase [ATP] (EC 4.1.1.49)                                | Carbohydrates | Central carbohydrate met  | 1       | 0       | 0        | 0        | 1       | 0       | 1        | 0        |
| Phosphoenolpyruvate carboxylase (EC 4.1.1.31)                                        | Carbohydrates | Central carbohydrate met  | 0       | 0       | 0        | 0        | 0       | 0       | 0        | 1        |
| Phosphoenolpyruvate synthase (EC 2.7.9.2)                                            | Carbohydrates | Central carbohydrate met  | 0       | 0       | 0        | 0        | 0       | 0       | 1        | 0        |
| Phosphoglucanate repressor HexR, RpiR family                                         | Carbohydrates | Monosaccharides           | 0       | 0       | 0        | 0        | 0       | 1       | 0        | 0        |
| Phosphoglycerate kinase (EC 2.7.2.3)                                                 | Carbohydrates | Central carbohydrate met  | 0       | 0       | 0        | 0        | 0       | 0       | 0        | 1        |
| Phosphosugar-binding transcriptional regulator, RpiR family                          | Carbohydrates | Central carbohydrate met  | 0       | 0       | 0        | 0        | 0       | 0       | 0        | 1        |
| Probable carboxyvinyl-carboxyphosphonate phosphorylmotase (EC 2.7.8.23)              | Carbohydrates | Central carbohydrate met  | 0       | 0       | 0        | 0        | 0       | 0       | 0        | 1        |
| PTS system, arbutin-, cellobiose-, and salicin-specific IIBC component (EC 2.7.1.69) | Carbohydrates | Di- and oligosaccharides  | 0       | 0       | 0        | 0        | 1       | 0       | 1        | 0        |
| PTS system, cellobiose-specific IIA component (EC 2.7.1.69)                          | Carbohydrates | Di- and oligosaccharides  | 0       | 0       | 0        | 0        | 0       | 0       | 1        | 0        |
| PTS system, fructose-specific IIBC component (EC 2.7.1.69)                           | Carbohydrates | Monosaccharides           | 0       | 0       | 1        | 0        | 0       | 0       | 0        | 0        |
| PTS system, fructose-specific phosphocarrier protein HPr/ IIA component (EC 2.7.1    | Carbohydrates | Monosaccharides           | 0       | 0       | 1        | 0        | 0       | 0       | 0        | 0        |
| PTS system, galactitol-specific IIA component (EC 2.7.1.69)                          | Carbohydrates | Monosaccharides           | 0       | 0       | 0        | 0        | 1       | 0       | 0        | 0        |
| PTS system, glucitol/sorbitol-specific IIA component (EC 2.7.1.69)                   | Carbohydrates | Monosaccharides           | 0       | 0       | 0        | 0        | 0       | 0       | 1        | 0        |
| PTS system, glucitol/sorbitol-specific IIB component and second of two IIC compor    | Carbohydrates | Monosaccharides           | 0       | 0       | 0        | 0        | 0       | 0       | 1        | 0        |
| PTS system, glucitol/sorbitol-specific IIC component (EC 2.7.1.69)                   | Carbohydrates | Monosaccharides           | 0       | 0       | 0        | 1        | 0       | 0       | 1        | 0        |
| PTS system, maltose and glucose-specific IIC component (EC 2.7.1.69)                 | Carbohydrates | Di- and oligosaccharides  | 0       | 0       | 0        | 0        | 0       | 0       | 1        | 0        |
| PTS system, mannitol-specific IIC component (EC 2.7.1.69)                            | Carbohydrates | Sugar alcohols            | 0       | 0       | 0        | 0        | 1       | 0       | 1        | 0        |
| PTS system, mannose-specific IIB component (EC 2.7.1.69)                             | Carbohydrates | Monosaccharides           | 0       | 0       | 0        | 0        | 0       | 0       | 1        | 0        |
| PTS system, mannose-specific IIC component (EC 2.7.1.69)                             | Carbohydrates | Monosaccharides           | 0       | 0       | 0        | 0        | 0       | 0       | 1        | 0        |
| PTS system, mannose-specific IID component (EC 2.7.1.69)                             | Carbohydrates | Monosaccharides           | 0       | 0       | 0        | 0        | 0       | 0       | 1        | 0        |
| PTS system, trehalose-specific IIB component (EC 2.7.1.69)                           | Carbohydrates | Di- and oligosaccharides  | 0       | 0       | 0        | 0        | 0       | 0       | 0        | 1        |
| Putative membrane protein, clustering with ActP                                      | Carbohydrates | Central carbohydrate met  | 1       | 0       | 1        | 0        | 1       | 0       | 1        | 0        |
| Putative oxidoreductase YdjL                                                         | Carbohydrates | Carbohydrates - no subcat | 0       | 0       | 0        | 0        | 1       | 0       | 1        | 0        |
| putative protein PaaI, possibly involved in aromatic compounds catabolism            | Carbohydrates | Central carbohydrate met  | 1       | 0       | 0        | 0        | 1       | 0       | 1        | 0        |
| Putative rpiR-family transcriptional regulatory protein                              | Carbohydrates | Central carbohydrate met  | 0       | 1       | 0        | 0        | 0       | 0       | 0        | 0        |
| Putative sugar ABC transporter precursor                                             | Carbohydrates | Monosaccharides           | 0       | 1       | 0        | 0        | 0       | 0       | 0        | 0        |
| putative sugar phosphotransferase component II B                                     | Carbohydrates | Monosaccharides           | 0       | 0       | 0        | 0        | 0       | 0       | 1        | 0        |
| Pyruvate decarboxylase (EC 4.1.1.1)                                                  | Carbohydrates | Central carbohydrate met  | 0       | 0       | 0        | 0        | 1       | 0       | 1        | 0        |
| Pyruvate formate-lyase (EC 2.3.1.54)                                                 | Carbohydrates | Fermentation              | 0       | 0       | 0        | 0        | 0       | 0       | 0        | 1        |
| Pyruvate kinase (EC 2.7.1.40)                                                        | Carbohydrates | Central carbohydrate met  | 0       | 0       | 0        | 0        | 0       | 0       | 0        | 1        |
| Pyruvate oxidase [ubiquinone, cytochrome] (EC 1.2.2.2); homolog poxB                 | Carbohydrates | Central carbohydrate met  | 0       | 0       | 0        | 0        | 0       | 0       | 1        | 0        |
| Rhamnogalacturonides degradation protein RhiN                                        | Carbohydrates | Monosaccharides           | 0       | 0       | 0        | 0        | 0       | 0       | 1        | 0        |
| Ribitol 2-dehydrogenase (EC 1.1.1.56)                                                | Carbohydrates | Central carbohydrate met  | 0       | 0       | 0        | 0        | 0       | 0       | 1        | 0        |
| Ribitol/Xylitol/Arabitol transporter, MFS superfamily                                | Carbohydrates | Sugar alcohols            | 0       | 0       | 1        | 0        | 0       | 0       | 1        | 0        |
| Ribose ABC transport system, periplasmic ribose-binding protein RbsB (TC 3.A.1.2.1   | Carbohydrates | Monosaccharides           | 0       | 0       | 1        | 0        | 1       | 0       | 1        | 0        |
| Ribose/xylose/arabinose/galactoside ABC-type transport systems, periplasmic sug      | Carbohydrates | Monosaccharides           | 0       | 0       | 0        | 0        | 1       | 0       | 1        | 0        |
| Ribose/xylose/arabinose/galactoside ABC-type transport systems, permease comp        | Carbohydrates | Monosaccharides           | 0       | 0       | 0        | 0        | 1       | 0       | 0        | 0        |
| ribosomal-protein-alanine N-acetyltransferase                                        | Carbohydrates | Central carbohydrate met  | 0       | 0       | 0        | 0        | 0       | 0       | 1        | 0        |
| Ribulokinase (EC 2.7.1.16)                                                           | Carbohydrates | Monosaccharides           | 0       | 0       | 0        | 0        | 1       | 0       | 0        | 0        |
| Sensor histidine protein kinase UhpB, glucose-6-phosphate specific (EC 2.7.13.3)     | Carbohydrates | Monosaccharides           | 0       | 0       | 0        | 0        | 0       | 1       | 0        | 0        |

| Chromosomal Genes (Plasmid-borne genes listed separately below)                | SEED CATEGORY                | SEED SUBCATEGORY             | BR7-2h- | BR7-2h- | BR21-2h- | BR21-2h- | BR7-8h- | BR7-8h- | BR21-8h- | BR21-8h- |
|--------------------------------------------------------------------------------|------------------------------|------------------------------|---------|---------|----------|----------|---------|---------|----------|----------|
|                                                                                |                              |                              | up      | down    | up       | down     | up      | down    | up       | down     |
| Sensor kinase CitA, DpiB (EC 2.7.3.-)                                          | Carbohydrates                | Organic acids                | 0       | 0       | 0        | 0        | 1       | 0       | 1        | 0        |
| Serine protein kinase (prkA protein), P-loop containing                        | Carbohydrates                | Carbohydrates - no subcat    | 0       | 0       | 0        | 0        | 1       | 0       | 1        | 0        |
| Sodium:dicarboxylate symporter                                                 | Carbohydrates                | Central carbohydrate met     | 0       | 0       | 0        | 0        | 1       | 0       | 0        | 0        |
| Succinate dehydrogenase iron-sulfur protein (EC 1.3.99.1)                      | Carbohydrates                | Central carbohydrate met     | 1       | 0       | 0        | 0        | 1       | 0       | 1        | 0        |
| Succinyl-CoA ligase [ADP-forming] alpha chain (EC 6.2.1.5)                     | Carbohydrates                | Central carbohydrate met     | 0       | 0       | 1        | 0        | 0       | 0       | 1        | 0        |
| Succinyl-CoA ligase [ADP-forming] beta chain (EC 6.2.1.5)                      | Carbohydrates                | Central carbohydrate met     | 0       | 0       | 0        | 0        | 0       | 0       | 1        | 0        |
| Succinyl-CoA:3-ketoacid-coenzyme A transferase subunit A (EC 2.8.3.5)          | Carbohydrates                | One-carbon Metabolism        | 0       | 0       | 0        | 0        | 1       | 0       | 0        | 0        |
| Sucrose permease, major facilitator superfamily                                | Carbohydrates                | Di- and oligosaccharides     | 0       | 0       | 0        | 0        | 0       | 0       | 1        | 0        |
| Sugar diacid utilization regulator SdaR                                        | Carbohydrates                | Monosaccharides              | 0       | 1       | 0        | 0        | 0       | 1       | 0        | 0        |
| Thiamine pyrophosphate-requiring protein Saci 2281                             | Carbohydrates                | Central carbohydrate met     | 0       | 0       | 0        | 0        | 0       | 0       | 1        | 0        |
| Threonine kinase in B12 biosynthesis                                           | Carbohydrates                | Sugar alcohols               | 0       | 0       | 0        | 0        | 0       | 0       | 0        | 1        |
| transcriptional regulator, RpiR family                                         | Carbohydrates                | Sugar alcohols               | 0       | 0       | 0        | 0        | 0       | 0       | 0        | 1        |
| Transcriptional regulatory protein CitB, DpiA                                  | Carbohydrates                | Organic acids                | 0       | 0       | 0        | 0        | 1       | 0       | 1        | 0        |
| Transcriptional repressor for pyruvate dehydrogenase complex                   | Carbohydrates                | Central carbohydrate met     | 0       | 0       | 0        | 0        | 0       | 1       | 0        | 1        |
| Transcriptional repressor of the fructose operon, DeoR family                  | Carbohydrates                | Monosaccharides              | 0       | 0       | 0        | 0        | 0       | 0       | 1        | 0        |
| Transcriptional repressor of the lac operon                                    | Carbohydrates                | Di- and oligosaccharides     | 0       | 0       | 0        | 0        | 0       | 0       | 0        | 1        |
| Trehalase (EC 3.2.1.28); Periplasmic trehalase precursor (EC 3.2.1.28)         | Carbohydrates                | Di- and oligosaccharides     | 0       | 0       | 0        | 0        | 1       | 0       | 1        | 0        |
| Trehalose synthase (EC 5.4.99.16)                                              | Carbohydrates                | Di- and oligosaccharides     | 0       | 0       | 0        | 0        | 0       | 0       | 1        | 0        |
| Trehalose-6-phosphate hydrolase (EC 3.2.1.93)                                  | Carbohydrates                | Di- and oligosaccharides     | 0       | 0       | 0        | 0        | 0       | 0       | 0        | 1        |
| Trehalose-6-phosphate phosphatase (EC 3.1.3.12)                                | Carbohydrates                | Di- and oligosaccharides     | 0       | 0       | 0        | 0        | 0       | 0       | 1        | 0        |
| Triosephosphate isomerase (EC 5.3.1.1)                                         | Carbohydrates                | Central carbohydrate met     | 0       | 0       | 0        | 0        | 0       | 0       | 0        | 1        |
| UDP-glucose 4-epimerase (EC 5.1.3.2)                                           | Carbohydrates                | Di- and oligosaccharides     | 0       | 1       | 0        | 0        | 0       | 1       | 0        | 1        |
| UDP-sugar hydrolase (EC 3.6.1.45); 5'-nucleotidase (EC 3.1.3.5)                | Carbohydrates                | Central carbohydrate met     | 0       | 0       | 0        | 0        | 1       | 0       | 0        | 0        |
| Uncharacterized protein YeaC                                                   | Carbohydrates                | Carbohydrates - no subcat    | 0       | 0       | 0        | 0        | 1       | 0       | 0        | 0        |
| UPF0229 protein YeaH                                                           | Carbohydrates                | Carbohydrates - no subcat    | 0       | 0       | 0        | 0        | 1       | 0       | 1        | 0        |
| Xylose ABC transporter, periplasmic xylose-binding protein XylF                | Carbohydrates                | Monosaccharides              | 0       | 0       | 0        | 0        | 1       | 0       | 1        | 0        |
| Xylose isomerase (EC 5.3.1.5)                                                  | Carbohydrates                | Monosaccharides              | 0       | 0       | 0        | 0        | 1       | 0       | 1        | 0        |
| Xyloside transporter XynT                                                      | Carbohydrates                | Monosaccharides              | 0       | 0       | 0        | 0        | 0       | 0       | 1        | 0        |
| Xylulose kinase (EC 2.7.1.17)                                                  | Carbohydrates                | Monosaccharides              | 0       | 0       | 0        | 0        | 0       | 0       | 1        | 0        |
| Mannitol-1-phosphate 5-dehydrogenase (EC 1.1.1.17)                             | Carbohydrates - stress       | Sugar alcohols               | 0       | 0       | 0        | 0        | 1       | 0       | 1        | 0        |
| Sorbitol-6-phosphate 2-dehydrogenase (EC 1.1.1.140)                            | Carbohydrates-stress         | Monosaccharides              | 0       | 0       | 0        | 0        | 0       | 0       | 1        | 0        |
| Carbamoyl-phosphate synthase large chain (EC 6.3.5.5)                          | Cell Division and Cell Cycle | Cell Division and Cell Cycle | 0       | 0       | 0        | 0        | 0       | 0       | 0        | 1        |
| Cell division transporter, ATP-binding protein FtsE (TC 3.A.5.1.1)             | Cell Division and Cell Cycle | Cell Division and Cell Cycle | 0       | 0       | 0        | 0        | 0       | 0       | 0        | 1        |
| Cell filamentation protein fic                                                 | Cell Division and Cell Cycle | Cell Division and Cell Cycle | 0       | 0       | 0        | 0        | 0       | 0       | 1        | 0        |
| Chromosome partitioning ATPase in PFGI-1-like cluster, ParA-like               | Cell Division and Cell Cycle | Cell Division and Cell Cycle | 0       | 0       | 0        | 0        | 0       | 0       | 0        | 1        |
| Cyclopropane-fatty-acyl-phospholipid synthase (EC 2.1.1.79), plant type        | Cell Division and Cell Cycle | Cell Division and Cell Cycle | 0       | 0       | 0        | 1        | 0       | 0       | 0        | 0        |
| DNA gyrase inhibitory protein                                                  | Cell Division and Cell Cycle | Cell Division and Cell Cycle | 0       | 0       | 0        | 0        | 0       | 0       | 1        | 0        |
| GTPase (EC 3.6.1.-)                                                            | Cell Division and Cell Cycle | Cell Division and Cell Cycle | 0       | 0       | 0        | 0        | 0       | 0       | 1        | 0        |
| Guanosine-5'-triphosphate,3'-diphosphate pyrophosphatase (EC 3.6.1.40) @ Exopr | Cell Division and Cell Cycle | Cell Division and Cell Cycle | 0       | 0       | 0        | 0        | 0       | 0       | 0        | 1        |
| Lipoprotein nlpl precursor                                                     | Cell Division and Cell Cycle | Cell Division and Cell Cycle | 0       | 0       | 0        | 1        | 0       | 0       | 0        | 1        |
| Preprotein translocase secY subunit (TC 3.A.5.1.1)                             | Cell Division and Cell Cycle | Cell Division and Cell Cycle | 0       | 0       | 0        | 0        | 0       | 0       | 0        | 1        |
| Rod shape-determining protein MreD                                             | Cell Division and Cell Cycle | Cell Division and Cell Cycle | 0       | 0       | 0        | 0        | 0       | 0       | 0        | 1        |
| 3-deoxy-D-manno-octulosonic-acid transferase (EC 2.-.-.-)                      | Cell Wall and Capsule        | Gram-Negative cell wall co   | 0       | 0       | 0        | 0        | 0       | 1       | 0        | 0        |
| ADP-heptose--lipooligosaccharide heptosyltransferase II (EC 2.4.1.-)           | Cell Wall and Capsule        | Gram-Negative cell wall co   | 0       | 0       | 0        | 0        | 0       | 0       | 0        | 1        |
| ADP-L-glycero-D-manno-heptose-6-epimerase (EC 5.1.3.20)                        | Cell Wall and Capsule        | Gram-Negative cell wall co   | 0       | 0       | 0        | 0        | 0       | 0       | 0        | 1        |
| alpha-dextrin endo-1,6-alpha-glucosidase precursor (pullulanase precursor)     | Cell Wall and Capsule        | Gram-Negative cell wall co   | 0       | 0       | 1        | 0        | 1       | 0       | 0        | 0        |
| AmpG permease                                                                  | Cell Wall and Capsule        | Cell Wall and Capsule - no : | 0       | 0       | 0        | 0        | 0       | 0       | 0        | 1        |
| Cellulose synthase operon protein C                                            | Cell Wall and Capsule        | Gram-Negative cell wall co   | 0       | 0       | 0        | 0        | 0       | 0       | 1        | 0        |
| Cellulose synthase, putative                                                   | Cell Wall and Capsule        | Gram-Negative cell wall co   | 0       | 0       | 0        | 0        | 0       | 0       | 1        | 0        |
| Cyclic di-GMP binding protein precursor                                        | Cell Wall and Capsule        | Capsular and extracellular   | 0       | 0       | 0        | 0        | 0       | 0       | 1        | 0        |

| Chromosomal Genes (Plasmid-borne genes listed separately below)                   | SEED CATEGORY                     | SEED SUBCATEGORY             | BR7-2h- | BR7-2h- | BR21-2h- | BR21-2h- | BR7-8h- | BR7-8h- | BR21-8h- | BR21-8h- |
|-----------------------------------------------------------------------------------|-----------------------------------|------------------------------|---------|---------|----------|----------|---------|---------|----------|----------|
|                                                                                   |                                   |                              | up      | down    | up       | down     | up      | down    | up       | down     |
| D-alanine--D-alanine ligase A (EC 6.3.2.4)                                        | Cell Wall and Capsule             | Cell Wall and Capsule - no : | 0       | 0       | 0        | 0        | 0       | 0       | 0        | 1        |
| D-glycero-D-manno-heptose 1,7-bisphosphate phosphatase (EC 3.1.1.-)               | Cell Wall and Capsule             | Capsular and extracellular   | 0       | 0       | 0        | 0        | 0       | 0       | 0        | 1        |
| dTDP-4-dehydrothymine 3,5-epimerase (EC 5.1.3.13)                                 | Cell Wall and Capsule             | Capsular and extracellular   | 0       | 0       | 0        | 1        | 0       | 0       | 0        | 0        |
| Endoglucanase precursor (EC 3.2.1.4)                                              | Cell Wall and Capsule             | Gram-Negative cell wall co   | 0       | 0       | 0        | 0        | 0       | 0       | 1        | 0        |
| Fe(2+)/alpha-ketoglutarate-dependent dioxygenase LpxO                             | Cell Wall and Capsule             | Gram-Negative cell wall co   | 1       | 0       | 0        | 0        | 1       | 0       | 1        | 0        |
| Glycoprotein-polysaccharide metabolism                                            | Cell Wall and Capsule             | Gram-Negative cell wall co   | 0       | 0       | 0        | 0        | 0       | 0       | 1        | 0        |
| Inner membrane protein YrbG, predicted calcium/sodium:proton antiporter           | Cell Wall and Capsule             | Gram-Negative cell wall co   | 0       | 0       | 0        | 0        | 0       | 0       | 0        | 1        |
| L,D-transpeptidase ErfK                                                           | Cell Wall and Capsule             | Cell Wall and Capsule - no : | 0       | 0       | 0        | 0        | 1       | 0       | 1        | 0        |
| L,D-transpeptidase YcfS                                                           | Cell Wall and Capsule             | Cell Wall and Capsule - no : | 0       | 0       | 0        | 0        | 0       | 0       | 1        | 0        |
| L,D-transpeptidase YnhG                                                           | Cell Wall and Capsule             | Cell Wall and Capsule - no : | 0       | 0       | 0        | 0        | 1       | 0       | 1        | 0        |
| Lipid A biosynthesis lauroyl acyltransferase (EC 2.3.1.-)                         | Cell Wall and Capsule             | Gram-Negative cell wall co   | 0       | 0       | 0        | 0        | 0       | 1       | 0        | 1        |
| Lipopolysaccharide biosynthesis protein RffA                                      | Cell Wall and Capsule             | Gram-Negative cell wall co   | 0       | 0       | 0        | 0        | 0       | 0       | 0        | 1        |
| Lipopolysaccharide biosynthesis protein RffC                                      | Cell Wall and Capsule             | Gram-Negative cell wall co   | 0       | 0       | 0        | 0        | 0       | 0       | 0        | 1        |
| Lipoprotein NlpD                                                                  | Cell Wall and Capsule             | Gram-Negative cell wall co   | 0       | 0       | 0        | 0        | 0       | 0       | 1        | 0        |
| Lipoprotein spr precursor                                                         | Cell Wall and Capsule             | Cell Wall and Capsule - no : | 0       | 0       | 0        | 0        | 0       | 0       | 1        | 0        |
| N-acetylglucosamine-1-phosphate uridylyltransferase (EC 2.7.7.23) / Glucosamine-1 | Cell Wall and Capsule             | Gram-Negative cell wall co   | 0       | 0       | 0        | 0        | 0       | 0       | 0        | 1        |
| N-acetylmuramic acid 6-phosphate etherase                                         | Cell Wall and Capsule             | Gram-Negative cell wall co   | 0       | 0       | 0        | 0        | 0       | 1       | 0        | 0        |
| Outer membrane chaperone Skp (OmpH) precursor                                     | Cell Wall and Capsule             | Gram-Negative cell wall co   | 0       | 0       | 0        | 0        | 0       | 0       | 0        | 1        |
| Oxidoreductase, short-chain dehydrogenase/reductase family (EC 1.1.1.-)           | Cell Wall and Capsule             | Capsular and extracellular   | 0       | 1       | 0        | 1        | 0       | 0       | 0        | 1        |
| Phosphoethanolamine transferase specific for the outer Kdo residue of lipopolysac | Cell Wall and Capsule             | Gram-Negative cell wall co   | 0       | 0       | 0        | 0        | 0       | 0       | 0        | 1        |
| probable exported protein STY0357; YafK (peptidoglycan biosynthesis)              | Cell Wall and Capsule             | Gram-Negative cell wall co   | 0       | 0       | 0        | 0        | 0       | 0       | 1        | 0        |
| Probable lipoprotein nlpC precursor                                               | Cell Wall and Capsule             | Cell Wall and Capsule - no : | 0       | 0       | 0        | 0        | 0       | 0       | 1        | 0        |
| Probable UDP-N-acetyl-D-mannosaminuronic acid transferase (EC 2.4.1.-)            | Cell Wall and Capsule             | Cell Wall and Capsule - no : | 0       | 0       | 0        | 0        | 0       | 0       | 0        | 1        |
| Putative outer membrane protein                                                   | Cell Wall and Capsule             | Gram-Negative cell wall co   | 0       | 0       | 0        | 0        | 0       | 1       | 0        | 0        |
| Succinoglycan biosynthesis protein exoV                                           | Cell Wall and Capsule             | Gram-Negative cell wall co   | 0       | 0       | 0        | 0        | 0       | 0       | 0        | 1        |
| Transglycosylase associated protein                                               | Cell Wall and Capsule             | Gram-Negative cell wall co   | 0       | 0       | 0        | 0        | 0       | 0       | 1        | 0        |
| UDP-4-amino-4-deoxy-L-arabinose--oxoglutarate aminotransferase (EC 2.6.1.-)       | Cell Wall and Capsule             | Gram-Negative cell wall co   | 0       | 0       | 0        | 0        | 0       | 0       | 1        | 0        |
| Uncharacterized protein YhjG                                                      | Cell Wall and Capsule             | Gram-Negative cell wall co   | 0       | 0       | 0        | 0        | 1       | 0       | 1        | 0        |
| Undecaprenyl-diphosphatase (EC 3.6.1.27)                                          | Cell Wall and Capsule             | Gram-Negative cell wall co   | 0       | 0       | 0        | 0        | 0       | 0       | 0        | 1        |
| Undecaprenyl-phosphate N-acetylglucosaminyl 1-phosphate transferase (EC 2.7.8.    | Cell Wall and Capsule             | Gram-Negative cell wall co   | 0       | 0       | 0        | 0        | 0       | 0       | 0        | 1        |
| 1,4-dihydroxy-2-naphthoyl-CoA hydrolase (EC 3.1.2.28) in menaquinone biosynthe    | Cofactors, Vitamins, Prosthetic C | Quinone cofactors            | 0       | 0       | 0        | 0        | 0       | 0       | 1        | 0        |
| 2-succinyl-5-enolpyruvyl-6-hydroxy-3- cyclohexene-1-carboxylic-acid synthase (EC  | Cofactors, Vitamins, Prosthetic C | Quinone cofactors            | 0       | 0       | 0        | 0        | 0       | 0       | 0        | 1        |
| 2-succinyl-6-hydroxy-2,4-cyclohexadiene-1- carboxylate synthase (EC 4.2.99.20)    | Cofactors, Vitamins, Prosthetic C | Quinone cofactors            | 0       | 0       | 0        | 0        | 0       | 0       | 0        | 1        |
| 3-ketoacyl-CoA thiolase (EC 2.3.1.16)                                             | Cofactors, Vitamins, Prosthetic C | Biotin                       | 1       | 0       | 0        | 0        | 1       | 0       | 1        | 0        |
| 3-ketoacyl-CoA thiolase (EC 2.3.1.16)                                             | Cofactors, Vitamins, Prosthetic C | Biotin                       | 0       | 0       | 0        | 0        | 1       | 0       | 1        | 0        |
| 4-hydroxythreonine-4-phosphate dehydrogenase (EC 1.1.1.262)                       | Cofactors, Vitamins, Prosthetic C | Pyridoxine                   | 0       | 0       | 0        | 0        | 0       | 0       | 0        | 1        |
| 8-amino-7-oxononanoate synthase (EC 2.3.1.47)                                     | Cofactors, Vitamins, Prosthetic C | Biotin                       | 0       | 0       | 0        | 0        | 0       | 1       | 0        | 1        |
| Adenosylmethionine-8-amino-7-oxononanoate aminotransferase (EC 2.6.1.62)          | Cofactors, Vitamins, Prosthetic C | Biotin                       | 0       | 0       | 0        | 0        | 0       | 1       | 0        | 1        |
| ATPase component BioM of energizing module of biotin ECF transporter              | Cofactors, Vitamins, Prosthetic C | Biotin                       | 0       | 0       | 0        | 0        | 0       | 0       | 1        | 0        |
| Biotin synthase (EC 2.8.1.6)                                                      | Cofactors, Vitamins, Prosthetic C | Biotin                       | 0       | 0       | 0        | 0        | 0       | 1       | 0        | 0        |
| Biotin synthesis protein BioC                                                     | Cofactors, Vitamins, Prosthetic C | Biotin                       | 0       | 0       | 0        | 0        | 0       | 1       | 0        | 0        |
| Coenzyme PQQ synthesis protein B                                                  | Cofactors, Vitamins, Prosthetic C | Quinone cofactors            | 0       | 0       | 0        | 0        | 0       | 0       | 1        | 0        |
| Coenzyme PQQ synthesis protein C                                                  | Cofactors, Vitamins, Prosthetic C | Quinone cofactors            | 0       | 0       | 0        | 0        | 0       | 0       | 1        | 0        |
| Coproporphyrinogen III oxidase, aerobic (EC 1.3.3.3)                              | Cofactors, Vitamins, Prosthetic C | Tetrapyrroles                | 0       | 0       | 0        | 0        | 0       | 1       | 0        | 0        |
| C-terminal domain of ClnA paralog, YdeJ                                           | Cofactors, Vitamins, Prosthetic C | NAD and NADP                 | 0       | 0       | 0        | 0        | 0       | 0       | 1        | 0        |
| D-erythrose-4-phosphate dehydrogenase (EC 1.2.1.72)                               | Cofactors, Vitamins, Prosthetic C | Pyridoxine                   | 0       | 0       | 0        | 0        | 0       | 0       | 0        | 1        |
| Dethiobiotin synthetase (EC 6.3.3.3)                                              | Cofactors, Vitamins, Prosthetic C | Biotin                       | 0       | 0       | 0        | 0        | 0       | 0       | 0        | 1        |
| Glutamate-1-semialdehyde aminotransferase (EC 5.4.3.8)                            | Cofactors, Vitamins, Prosthetic C | Tetrapyrroles                | 0       | 0       | 0        | 0        | 0       | 0       | 0        | 1        |
| Hydroxyethylthiazole kinase (EC 2.7.1.50)                                         | Cofactors, Vitamins, Prosthetic C | Cofactors, Vitamins, Prost   | 0       | 0       | 0        | 0        | 1       | 0       | 1        | 0        |
| Hydroxymethylpyrimidine ABC transporter, substrate-binding component              | Cofactors, Vitamins, Prosthetic C | Cofactors, Vitamins, Prost   | 0       | 0       | 0        | 0        | 1       | 0       | 1        | 0        |

|                                                                                            | SEED CATEGORY                        | SEED SUBCATEGORY                  | BR7-2h- | BR7-2h- | BR21-2h- | BR21-2h- | BR7-8h- | BR7-8h- | BR21-8h- | BR21-8h- |
|--------------------------------------------------------------------------------------------|--------------------------------------|-----------------------------------|---------|---------|----------|----------|---------|---------|----------|----------|
|                                                                                            |                                      |                                   | up      | down    | up       | down     | up      | down    | up       | down     |
| Chromosomal Genes (Plasmid-borne genes listed separately below)                            |                                      |                                   |         |         |          |          |         |         |          |          |
| Hydroxymethylpyrimidine ABC transporter, transmembrane component                           | Cofactors, Vitamins, Prosthetic C    | Cofactors, Vitamins, Prosthetic C | 0       | 0       | 0        | 0        | 1       | 0       | 1        | 0        |
| Hypothetical similar to thiamin biosynthesis lipoprotein ApbE                              | Cofactors, Vitamins, Prosthetic C    | Cofactors, Vitamins, Prosthetic C | 0       | 0       | 0        | 0        | 0       | 0       | 1        | 0        |
| Hypoxanthine-guanine phosphoribosyltransferase (EC 2.4.2.8)                                | Cofactors, Vitamins, Prosthetic C    | Folate and pterines               | 0       | 0       | 0        | 0        | 0       | 0       | 0        | 1        |
| Long-chain-fatty-acid--CoA ligase (EC 6.2.1.3)                                             | Cofactors, Vitamins, Prosthetic C    | Biotin                            | 0       | 0       | 0        | 0        | 1       | 0       | 1        | 0        |
| Microsomal dipeptidase (EC 3.4.13.19)                                                      | Cofactors, Vitamins, Prosthetic C    | Quinone cofactors                 | 0       | 0       | 0        | 0        | 0       | 0       | 1        | 0        |
| Molybdenum-binding periplasmic protein                                                     | Cofactors, Vitamins, Prosthetic C    | Folate and pterines               | 0       | 0       | 0        | 1        | 0       | 0       | 0        | 0        |
| NAD(P)H-flavin reductase (EC 1.5.1.29) (EC 1.16.1.3)                                       | Cofactors, Vitamins, Prosthetic C    | Quinone cofactors                 | 0       | 0       | 0        | 0        | 0       | 0       | 0        | 1        |
| NfuA Fe-S protein maturation                                                               | Cofactors, Vitamins, Prosthetic C    | Biotin                            | 0       | 0       | 0        | 0        | 1       | 0       | 0        | 0        |
| Nicotinamidase/isochorismatase family protein                                              | Cofactors, Vitamins, Prosthetic C    | NAD and NADP                      | 0       | 0       | 1        | 0        | 0       | 0       | 1        | 0        |
| Phosphomethylpyrimidine kinase (EC 2.7.4.7)                                                | Cofactors, Vitamins, Prosthetic C    | Cofactors, Vitamins, Prosthetic C | 0       | 0       | 0        | 0        | 1       | 0       | 1        | 0        |
| Porphobilinogen synthase (EC 4.2.1.24)                                                     | Cofactors, Vitamins, Prosthetic C    | Tetrapyrroles                     | 0       | 0       | 0        | 0        | 0       | 0       | 0        | 1        |
| Protoporphyrinogen IX oxidase, oxygen-independent, HemG (EC 1.3.-.-)                       | Cofactors, Vitamins, Prosthetic C    | Tetrapyrroles                     | 0       | 0       | 0        | 0        | 0       | 0       | 0        | 1        |
| Putative molybdenum transport ATP-binding protein modF                                     | Cofactors, Vitamins, Prosthetic C    | Folate and pterines               | 0       | 1       | 0        | 1        | 0       | 1       | 0        | 1        |
| Succinyl-CoA synthetase, alpha subunit-related enzymes                                     | Cofactors, Vitamins, Prosthetic C    | Quinone cofactors                 | 0       | 0       | 0        | 0        | 0       | 0       | 1        | 0        |
| Sulfur carrier protein adenyltransferase ThiF                                              | Cofactors, Vitamins, Prosthetic C    | Cofactors, Vitamins, Prosthetic C | 0       | 0       | 0        | 0        | 1       | 0       | 1        | 0        |
| Thiamin ABC transporter, substrate-binding component                                       | Cofactors, Vitamins, Prosthetic C    | Cofactors, Vitamins, Prosthetic C | 0       | 0       | 0        | 0        | 1       | 0       | 1        | 0        |
| Thiaminase II (EC 3.5.99.2)                                                                | Cofactors, Vitamins, Prosthetic C    | Cofactors, Vitamins, Prosthetic C | 0       | 0       | 0        | 0        | 1       | 0       | 1        | 0        |
| Thiamin-phosphate pyrophosphorylase (EC 2.5.1.3)                                           | Cofactors, Vitamins, Prosthetic C    | Cofactors, Vitamins, Prosthetic C | 0       | 0       | 0        | 0        | 1       | 0       | 1        | 0        |
| Thiazole biosynthesis protein ThiG                                                         | Cofactors, Vitamins, Prosthetic C    | Cofactors, Vitamins, Prosthetic C | 0       | 0       | 0        | 0        | 1       | 0       | 1        | 0        |
| Thiazole biosynthesis protein ThiH                                                         | Cofactors, Vitamins, Prosthetic C    | Cofactors, Vitamins, Prosthetic C | 0       | 0       | 0        | 0        | 1       | 0       | 1        | 0        |
| tRNA (5-methylaminomethyl-2-thiouridylate)-methyltransferase (EC 2.1.1.61)                 | Cofactors, Vitamins, Prosthetic C    | Riboflavin, FMN, FAD              | 0       | 0       | 0        | 0        | 0       | 0       | 0        | 1        |
| tRNA pseudouridine synthase B (EC 4.2.1.70)                                                | Cofactors, Vitamins, Prosthetic C    | Riboflavin, FMN, FAD              | 0       | 0       | 0        | 0        | 0       | 1       | 0        | 1        |
| Ubiquinone/menaquinone biosynthesis methyltransferase UbiE (EC 2.1.1.-) @ 2-h              | Cofactors, Vitamins, Prosthetic C    | Quinone cofactors                 | 0       | 0       | 0        | 0        | 0       | 0       | 0        | 1        |
| Uroporphyrinogen-III synthase (EC 4.2.1.75)                                                | Cofactors, Vitamins, Prosthetic C    | Tetrapyrroles                     | 0       | 0       | 0        | 0        | 0       | 0       | 0        | 1        |
| Vitamin B12 ABC transporter, ATPase component BtuD                                         | Cofactors, Vitamins, Prosthetic C    | Tetrapyrroles                     | 0       | 0       | 0        | 0        | 0       | 0       | 1        | 0        |
| Vitamin B12 ABC transporter, B12-binding component BtuF                                    | Cofactors, Vitamins, Prosthetic C    | Tetrapyrroles                     | 0       | 0       | 0        | 0        | 0       | 0       | 0        | 1        |
| ATP-dependent helicase DinG/Rad3                                                           | DNA Metabolism                       | DNA repair                        | 0       | 0       | 0        | 0        | 0       | 1       | 0        | 0        |
| Deoxyribonuclease TatD                                                                     | DNA Metabolism                       | DNA Metabolism - no subc          | 0       | 0       | 0        | 0        | 0       | 0       | 0        | 1        |
| DNA polymerase II (EC 2.7.7.7)                                                             | DNA Metabolism                       | DNA repair                        | 0       | 0       | 0        | 0        | 0       | 1       | 0        | 0        |
| DNA polymerase III psi subunit (EC 2.7.7.7)                                                | DNA Metabolism                       | DNA uptake, competence            | 0       | 0       | 0        | 0        | 0       | 0       | 0        | 1        |
| DNA repair protein RadC                                                                    | DNA Metabolism                       | DNA repair                        | 0       | 0       | 0        | 1        | 0       | 0       | 0        | 0        |
| DNA repair protein RecN                                                                    | DNA Metabolism                       | DNA repair                        | 0       | 0       | 0        | 0        | 0       | 0       | 1        | 0        |
| DNA-3-methyladenine glycosylase II (EC 3.2.2.21)                                           | DNA Metabolism                       | DNA repair                        | 0       | 0       | 0        | 0        | 0       | 0       | 1        | 0        |
| DNA-binding protein Fis                                                                    | DNA Metabolism                       | DNA Metabolism - no subc          | 0       | 0       | 0        | 0        | 0       | 1       | 0        | 0        |
| DNA-damage-inducible protein D                                                             | DNA Metabolism                       | DNA repair                        | 0       | 0       | 0        | 0        | 1       | 0       | 0        | 0        |
| DNA-damage-inducible protein F                                                             | DNA Metabolism                       | DNA repair                        | 0       | 0       | 0        | 0        | 0       | 1       | 0        | 0        |
| DNA-damage-inducible protein I                                                             | DNA Metabolism                       | DNA repair                        | 0       | 0       | 0        | 0        | 0       | 0       | 1        | 0        |
| Endonuclease I precursor (EC 3.1.21.1) @ Extracellular deoxyribonuclease Dns (EC 3.1.21.1) | DNA Metabolism                       | DNA repair                        | 0       | 0       | 0        | 0        | 0       | 1       | 0        | 1        |
| Endonuclease III (EC 4.2.99.18)                                                            | DNA Metabolism                       | DNA repair                        | 0       | 0       | 0        | 0        | 0       | 1       | 0        | 0        |
| Exodeoxyribonuclease VII large subunit (EC 3.1.11.6)                                       | DNA Metabolism                       | DNA repair                        | 0       | 0       | 0        | 0        | 0       | 1       | 0        | 0        |
| Exonuclease SbcD                                                                           | DNA Metabolism                       | DNA repair                        | 0       | 0       | 0        | 0        | 0       | 0       | 0        | 1        |
| Protein involved in catabolism of external DNA                                             | DNA Metabolism                       | DNA uptake, competence            | 0       | 0       | 0        | 0        | 0       | 0       | 0        | 1        |
| Single-stranded-DNA-specific exonuclease RecJ (EC 3.1.-.-)                                 | DNA Metabolism                       | DNA repair                        | 0       | 0       | 0        | 0        | 0       | 0       | 0        | 1        |
| Uracil-DNA glycosylase, family 1                                                           | DNA Metabolism                       | DNA repair                        | 0       | 0       | 0        | 0        | 0       | 0       | 0        | 1        |
| Cell division inhibitor - sulA                                                             | Dormancy and Sporulation             | Dormancy and Sporulation          | 0       | 0       | 0        | 0        | 0       | 0       | 1        | 0        |
| Conidiation-specific protein 10                                                            | Dormancy and Sporulation             | Dormancy and Sporulation          | 0       | 0       | 0        | 0        | 0       | 0       | 1        | 0        |
| FIG004684: SpoVR-like protein                                                              | Dormancy and Sporulation             | Dormancy and Sporulation          | 0       | 0       | 0        | 0        | 1       | 0       | 1        | 0        |
| YaaH protein                                                                               | Dormancy and Sporulation             | Dormancy and Sporulation          | 0       | 0       | 0        | 0        | 0       | 0       | 0        | 1        |
| 3-hydroxyacyl-[acyl-carrier-protein] dehydratase, FabA form (EC 4.2.1.59)                  | Fatty Acids, Lipids, and Isoprenoids | Fatty acids, biosynthesis         | 0       | 0       | 0        | 0        | 0       | 0       | 0        | 1        |
| 3-hydroxyacyl-[acyl-carrier-protein] dehydratase, FabZ form (EC 4.2.1.59)                  | Fatty Acids, Lipids, and Isoprenoids | Fatty acids, biosynthesis         | 0       | 0       | 0        | 0        | 0       | 0       | 0        | 1        |



| Chromosomal Genes (Plasmid-borne genes listed separately below)                    | SEED CATEGORY                     | SEED SUBCATEGORY             | BR7-2h- | BR7-2h- | BR21-2h- | BR21-2h- | BR7-8h- | BR7-8h- | BR21-8h- | BR21-8h- |
|------------------------------------------------------------------------------------|-----------------------------------|------------------------------|---------|---------|----------|----------|---------|---------|----------|----------|
|                                                                                    |                                   |                              | up      | down    | up       | down     | up      | down    | up       | down     |
| 3-hydroxybutyryl-CoA dehydrogenase (EC 1.1.1.157)                                  | Fatty Acids, Lipids, and Isopreno | Fatty acids                  | 0       | 0       | 0        | 0        | 1       | 0       | 1        | 0        |
| 3-oxoacyl-[acyl-carrier protein] reductase (EC 1.1.1.100)                          | Fatty Acids, Lipids, and Isopreno | Fatty acids, biosynthesis    | 0       | 0       | 0        | 0        | 0       | 0       | 0        | 1        |
| Acyl carrier protein                                                               | Fatty Acids, Lipids, and Isopreno | Phospholipids                | 0       | 0       | 0        | 0        | 0       | 0       | 0        | 1        |
| Acyl-CoA dehydrogenase (EC 1.3.8.7)                                                | Fatty Acids, Lipids, and Isopreno | Fatty acids                  | 0       | 0       | 0        | 0        | 1       | 0       | 1        | 0        |
| Acyl-CoA dehydrogenase; probable dibenzothiophene desulfurization enzyme           | Fatty Acids, Lipids, and Isopreno | Fatty acids                  | 0       | 0       | 0        | 0        | 1       | 0       | 1        | 0        |
| Butyryl-CoA dehydrogenase (EC 1.3.99.2)                                            | Fatty Acids, Lipids, and Isopreno | Fatty acids                  | 0       | 0       | 0        | 0        | 1       | 0       | 1        | 0        |
| D-beta-hydroxybutyrate dehydrogenase (EC 1.1.1.30)                                 | Fatty Acids, Lipids, and Isopreno | Fatty Acids, Lipids, and Iso | 0       | 0       | 0        | 0        | 0       | 0       | 1        | 0        |
| D-beta-hydroxybutyrate permease                                                    | Fatty Acids, Lipids, and Isopreno | Fatty Acids, Lipids, and Iso | 0       | 0       | 0        | 0        | 1       | 0       | 0        | 0        |
| Enoyl-[acyl-carrier-protein] reductase [NADH] (EC 1.3.1.9)                         | Fatty Acids, Lipids, and Isopreno | Fatty acids                  | 0       | 0       | 0        | 0        | 0       | 0       | 0        | 1        |
| Enoyl-CoA hydratase (EC 4.2.1.17) / Delta(3)-cis-delta(2)-trans-enoyl-CoA isomeras | Fatty Acids, Lipids, and Isopreno | Fatty acids                  | 0       | 0       | 0        | 0        | 1       | 0       | 1        | 0        |
| Fatty acid desaturase                                                              | Fatty Acids, Lipids, and Isopreno | Fatty acids                  | 0       | 0       | 0        | 0        | 0       | 0       | 1        | 0        |
| Malonyl CoA-acyl carrier protein transacylase (EC 2.3.1.39)                        | Fatty Acids, Lipids, and Isopreno | Fatty acids, biosynthesis    | 0       | 0       | 0        | 0        | 0       | 0       | 0        | 1        |
| Medium-chain-fatty-acid--CoA ligase (EC 6.2.1.-)                                   | Fatty Acids, Lipids, and Isopreno | Fatty acids                  | 0       | 0       | 0        | 0        | 0       | 0       | 1        | 0        |
| Phosphate:acyl-ACP acyltransferase PlsX                                            | Fatty Acids, Lipids, and Isopreno | Phospholipids                | 0       | 0       | 0        | 0        | 0       | 0       | 0        | 1        |
| Putative phosphatidylglycerophosphate synthase                                     | Fatty Acids, Lipids, and Isopreno | Phospholipids                | 0       | 0       | 0        | 0        | 0       | 0       | 0        | 1        |
| 2,3-dihydro-2,3-dihydroxybenzoate dehydrogenase (EC 1.3.1.28) [enterobactin] sid   | Iron acquisition and metabolism   | Siderophores                 | 0       | 0       | 0        | 0        | 0       | 0       | 1        | 0        |
| 2,3-dihydroxybenzoate-AMP ligase (EC 2.7.7.58) of siderophore biosynthesis         | Iron acquisition and metabolism   | Siderophores                 | 0       | 0       | 1        | 0        | 0       | 1       | 1        | 0        |
| ABC transporter (iron.B12.siderophore.hemin) , ATP-binding component               | Iron acquisition and metabolism   | Iron acquisition and metab   | 0       | 0       | 0        | 0        | 0       | 0       | 1        | 0        |
| ABC transporter (iron.B12.siderophore.hemin) , periplasmic substrate-binding com   | Iron acquisition and metabolism   | Iron acquisition and metab   | 1       | 0       | 0        | 0        | 0       | 1       | 1        | 0        |
| ABC transporter (iron.B12.siderophore.hemin) , permease component                  | Iron acquisition and metabolism   | Iron acquisition and metab   | 0       | 0       | 0        | 0        | 0       | 1       | 1        | 0        |
| ABC-type Fe3+-siderophore transport system, ATPase component                       | Iron acquisition and metabolism   | Siderophores                 | 0       | 0       | 1        | 0        | 0       | 1       | 1        | 0        |
| Aerobactin siderophore receptor IutA                                               | Iron acquisition and metabolism   | Siderophores                 | 0       | 0       | 0        | 0        | 0       | 1       | 0        | 0        |
| Bacterioferritin                                                                   | Iron acquisition and metabolism   | Iron acquisition and metab   | 0       | 0       | 0        | 0        | 1       | 0       | 1        | 0        |
| Enterobactin esterase                                                              | Iron acquisition and metabolism   | Siderophores                 | 0       | 0       | 1        | 0        | 0       | 0       | 1        | 0        |
| Enterobactin exporter EntS                                                         | Iron acquisition and metabolism   | Siderophores                 | 0       | 0       | 1        | 0        | 0       | 0       | 1        | 0        |
| Enterobactin synthetase component F, serine activating enzyme (EC 2.7.7.-); entE   | Iron acquisition and metabolism   | Siderophores                 | 0       | 0       | 1        | 0        | 0       | 1       | 1        | 0        |
| Ferric enterobactin transport system permease protein FepD (TC 3.A.1.14.2)         | Iron acquisition and metabolism   | Siderophores                 | 0       | 0       | 0        | 0        | 0       | 1       | 1        | 0        |
| Ferric enterobactin transport system permease protein FepG (TC 3.A.1.14.2)         | Iron acquisition and metabolism   | Siderophores                 | 0       | 0       | 1        | 0        | 0       | 1       | 1        | 0        |
| Ferric enterobactin-binding periplasmic protein FepB (TC 3.A.1.14.2)               | Iron acquisition and metabolism   | Siderophores                 | 0       | 0       | 0        | 0        | 0       | 0       | 1        | 0        |
| Ferric hydroxamate ABC transporter (TC 3.A.1.14.3), ATP-binding protein FhuC       | Iron acquisition and metabolism   | Siderophores                 | 0       | 0       | 1        | 0        | 0       | 1       | 1        | 0        |
| Ferric hydroxamate ABC transporter (TC 3.A.1.14.3), periplasmic substrate binding  | Iron acquisition and metabolism   | Siderophores                 | 0       | 0       | 1        | 0        | 0       | 1       | 0        | 0        |
| Ferric hydroxamate ABC transporter (TC 3.A.1.14.3), permease component FhuB        | Iron acquisition and metabolism   | Siderophores                 | 0       | 0       | 1        | 0        | 0       | 1       | 0        | 0        |
| Ferric hydroxamate outer membrane receptor FhuA                                    | Iron acquisition and metabolism   | Siderophores                 | 0       | 0       | 1        | 0        | 0       | 0       | 1        | 0        |
| Ferric iron ABC transporter, iron-binding protein                                  | Iron acquisition and metabolism   | Iron acquisition and metab   | 0       | 0       | 0        | 0        | 0       | 0       | 1        | 0        |
| Ferric iron ABC transporter, permease protein                                      | Iron acquisition and metabolism   | Iron acquisition and metab   | 1       | 0       | 0        | 0        | 1       | 0       | 1        | 0        |
| Ferric reductase (1.6.99.14); fhuF                                                 | Iron acquisition and metabolism   | Iron acquisition and metab   | 0       | 0       | 0        | 0        | 0       | 0       | 1        | 0        |
| Ferric siderophore transport system, periplasmic binding protein TonB              | Iron acquisition and metabolism   | Iron acquisition and metab   | 0       | 0       | 0        | 0        | 0       | 1       | 0        | 0        |
| Ferrichrome-iron receptor                                                          | Iron acquisition and metabolism   | Iron acquisition and metab   | 0       | 0       | 1        | 0        | 0       | 1       | 1        | 0        |
| Ferritin-like protein 2                                                            | Iron acquisition and metabolism   | Iron acquisition and metab   | 0       | 0       | 0        | 0        | 0       | 0       | 0        | 1        |
| Ferrous iron transport periplasmic protein EfeO, contains peptidase-M75 domain ε   | Iron acquisition and metabolism   | Iron acquisition and metab   | 0       | 0       | 0        | 0        | 0       | 1       | 0        | 0        |
| Ferrous iron transport permease EfeU                                               | Iron acquisition and metabolism   | Iron acquisition and metab   | 0       | 0       | 0        | 0        | 0       | 1       | 1        | 0        |
| Ferrous iron transport peroxidase EfeB                                             | Iron acquisition and metabolism   | Iron acquisition and metab   | 0       | 0       | 0        | 0        | 0       | 1       | 0        | 0        |
| Ferrous iron transport protein A                                                   | Iron acquisition and metabolism   | Iron acquisition and metab   | 0       | 1       | 0        | 0        | 0       | 1       | 0        | 0        |
| Ferrous iron transport protein B                                                   | Iron acquisition and metabolism   | Iron acquisition and metab   | 0       | 1       | 0        | 0        | 0       | 1       | 0        | 0        |
| Iron binding protein SufA for iron-sulfur cluster assembly                         | Iron acquisition and metabolism   | Iron acquisition and metab   | 0       | 0       | 0        | 0        | 0       | 0       | 1        | 0        |
| Isochorismatase (EC 3.3.2.1) [enterobactin] siderophore                            | Iron acquisition and metabolism   | Siderophores                 | 0       | 0       | 0        | 0        | 0       | 1       | 1        | 0        |
| Periplasmic esterase IroE                                                          | Iron acquisition and metabolism   | Iron acquisition and metab   | 0       | 0       | 0        | 0        | 0       | 0       | 1        | 0        |
| Proofreading thioesterase in enterobactin biosynthesis EntH                        | Iron acquisition and metabolism   | Siderophores                 | 0       | 0       | 0        | 0        | 0       | 1       | 1        | 0        |
| Putative ABC transporter, periplasmic iron binding protein precursor               | Iron acquisition and metabolism   | Siderophores                 | 0       | 0       | 0        | 0        | 1       | 0       | 1        | 0        |
| Putative iron compound permease protein of ABC transporter family                  | Iron acquisition and metabolism   | Iron acquisition and metab   | 0       | 0       | 1        | 0        | 0       | 1       | 1        | 0        |

| Chromosomal Genes (Plasmid-borne genes listed separately below)                       | SEED CATEGORY                   | SEED SUBCATEGORY            | BR7-2h-<br>up | BR7-2h-<br>down | BR21-2h-<br>up | BR21-2h-<br>down | BR7-8h-<br>up | BR7-8h-<br>down | BR21-8h-<br>up | BR21-8h-<br>down |
|---------------------------------------------------------------------------------------|---------------------------------|-----------------------------|---------------|-----------------|----------------|------------------|---------------|-----------------|----------------|------------------|
| putative permease of ferrichrome ABC transporter                                      | Iron acquisition and metabolism | Iron acquisition and metab  | 0             | 0               | 0              | 0                | 0             | 0               | 1              | 0                |
| Sulfur acceptor protein SufE for iron-sulfur cluster assembly                         | Iron acquisition and metabolism | Iron acquisition and metab  | 0             | 0               | 0              | 0                | 0             | 0               | 1              | 0                |
| TonB-dependent receptor; Outer membrane receptor for ferric enterobactin and c        | Iron acquisition and metabolism | Iron acquisition and metab  | 0             | 0               | 1              | 0                | 0             | 1               | 1              | 0                |
| Non-specific DNA-binding protein Dps / Iron-binding ferritin-like antioxidant protein | Iron acquisition and metabolism | Iron acquisition and metab  | 0             | 0               | 0              | 0                | 1             | 0               | 1              | 0                |
| ABC sugar transporter, ATP-binding subunit                                            | Membrane Transport              | ABC transporters            | 0             | 0               | 0              | 0                | 0             | 0               | 1              | 0                |
| ABC transporter ATP-binding protein                                                   | Membrane Transport              | ABC transporters            | 0             | 0               | 0              | 0                | 0             | 0               | 1              | 0                |
| ABC transporter, permease protein YnjC                                                | Membrane Transport              | ABC transporters            | 0             | 0               | 0              | 0                | 0             | 1               | 0              | 0                |
| amino acid ABC transporter, permease protein                                          | Membrane Transport              | ABC transporters            | 0             | 0               | 0              | 0                | 0             | 1               | 0              | 0                |
| Biopolymer transport protein ExbD/TolR                                                | Membrane Transport              | Membrane Transport - no     | 0             | 0               | 0              | 0                | 0             | 1               | 0              | 0                |
| Branched-chain amino acid ABC transporter, amino acid-binding protein (TC 3.A.1.      | Membrane Transport              | ABC transporters            | 0             | 0               | 0              | 0                | 1             | 0               | 0              | 0                |
| Calcium/proton antiporter                                                             | Membrane Transport              | Cation transporters         | 0             | 0               | 0              | 0                | 0             | 0               | 1              | 0                |
| Cation transport protein chaC                                                         | Membrane Transport              | Cation transporters         | 0             | 0               | 0              | 0                | 0             | 0               | 1              | 0                |
| Cation transport regulator chaB                                                       | Membrane Transport              | Cation transporters         | 0             | 0               | 0              | 0                | 1             | 0               | 1              | 0                |
| Chaperone protein fimC precursor                                                      | Membrane Transport              | Protein secretion system, 1 | 0             | 0               | 0              | 0                | 0             | 0               | 0              | 1                |
| Colicin I receptor precursor                                                          | Membrane Transport              | Membrane Transport - no     | 0             | 0               | 0              | 0                | 0             | 1               | 1              | 0                |
| Di/tripeptide permease DtpA                                                           | Membrane Transport              | Uni- Sym- and Antiporters   | 0             | 0               | 0              | 0                | 0             | 0               | 1              | 0                |
| Di/tripeptide permease YbgH                                                           | Membrane Transport              | Uni- Sym- and Antiporters   | 0             | 0               | 0              | 0                | 0             | 0               | 0              | 1                |
| Di-/tripeptide transporter                                                            | Membrane Transport              | Uni- Sym- and Antiporters   | 0             | 0               | 0              | 0                | 1             | 0               | 1              | 0                |
| Dipeptide transport ATP-binding protein DppD (TC 3.A.1.5.2)                           | Membrane Transport              | ABC transporters            | 0             | 0               | 0              | 0                | 0             | 0               | 1              | 0                |
| Dipeptide transport ATP-binding protein DppF (TC 3.A.1.5.2)                           | Membrane Transport              | ABC transporters            | 0             | 0               | 0              | 0                | 0             | 0               | 1              | 0                |
| Dipeptide transport system permease protein DppB (TC 3.A.1.5.2)                       | Membrane Transport              | ABC transporters            | 0             | 0               | 0              | 0                | 1             | 0               | 1              | 0                |
| Dipeptide transport system permease protein DppC (TC 3.A.1.5.2)                       | Membrane Transport              | ABC transporters            | 0             | 0               | 0              | 0                | 0             | 0               | 1              | 0                |
| Dipeptide-binding ABC transporter, periplasmic substrate-binding component (TC 3      | Membrane Transport              | ABC transporters            | 0             | 0               | 0              | 0                | 0             | 0               | 1              | 0                |
| FIGfam014588: Predicted regulator of CFA/I fimbriae                                   | Membrane Transport              | Protein secretion system, 1 | 0             | 0               | 0              | 0                | 0             | 0               | 1              | 0                |
| Fimbriae usher protein StcC                                                           | Membrane Transport              | Protein secretion system, 1 | 0             | 0               | 0              | 0                | 0             | 0               | 0              | 1                |
| General secretion pathway protein D                                                   | Membrane Transport              | Protein secretion system, 1 | 0             | 0               | 0              | 0                | 1             | 0               | 0              | 1                |
| General secretion pathway protein E                                                   | Membrane Transport              | Protein secretion system, 1 | 0             | 0               | 0              | 0                | 1             | 0               | 0              | 1                |
| General secretion pathway protein F                                                   | Membrane Transport              | Protein secretion system, 1 | 0             | 0               | 0              | 0                | 0             | 0               | 0              | 1                |
| General secretion pathway protein G                                                   | Membrane Transport              | Protein secretion system, 1 | 0             | 0               | 0              | 0                | 0             | 0               | 0              | 1                |
| General secretion pathway protein J                                                   | Membrane Transport              | Protein secretion system, 1 | 0             | 0               | 0              | 0                | 1             | 0               | 0              | 0                |
| General secretion pathway protein K                                                   | Membrane Transport              | Protein secretion system, 1 | 0             | 0               | 0              | 0                | 0             | 0               | 0              | 1                |
| General secretion pathway protein L                                                   | Membrane Transport              | Protein secretion system, 1 | 0             | 0               | 0              | 0                | 1             | 0               | 0              | 1                |
| General secretion pathway protein M                                                   | Membrane Transport              | Protein secretion system, 1 | 0             | 0               | 0              | 0                | 0             | 0               | 0              | 1                |
| Glutamine ABC transporter, periplasmic glutamine-binding protein (TC 3.A.1.3.2)       | Membrane Transport              | ABC transporters            | 0             | 0               | 0              | 0                | 1             | 0               | 1              | 0                |
| H(+)/Cl(-) exchange transporter ClcA                                                  | Membrane Transport              | Cation transporters         | 0             | 0               | 0              | 0                | 0             | 1               | 0              | 0                |
| Hypothetical MFS-type transporter protein YcaD                                        | Membrane Transport              | MFS transporter             | 0             | 0               | 0              | 0                | 0             | 0               | 1              | 0                |
| Leader peptidase (Prepilin peptidase) (EC 3.4.23.43)                                  | Membrane Transport              | Protein and nucleoprotein   | 0             | 0               | 0              | 0                | 0             | 0               | 0              | 1                |
| Magnesium and cobalt efflux protein CorC                                              | Membrane Transport              | Cation transporters         | 0             | 0               | 0              | 0                | 0             | 0               | 0              | 1                |
| Manganese ABC transporter, ATP-binding protein SitB                                   | Membrane Transport              | ABC transporters            | 0             | 0               | 1              | 0                | 0             | 0               | 1              | 0                |
| Manganese ABC transporter, inner membrane permease protein SitC                       | Membrane Transport              | ABC transporters            | 0             | 0               | 0              | 0                | 0             | 0               | 1              | 0                |
| Manganese ABC transporter, inner membrane permease protein SitD                       | Membrane Transport              | ABC transporters            | 0             | 0               | 0              | 0                | 0             | 0               | 1              | 0                |
| Manganese ABC transporter, periplasmic-binding protein SitA                           | Membrane Transport              | ABC transporters            | 0             | 0               | 0              | 0                | 0             | 0               | 1              | 0                |
| Manganese transport protein MntH                                                      | Membrane Transport              | Membrane Transport - no     | 0             | 0               | 0              | 0                | 0             | 0               | 1              | 0                |
| Mg(2+) transport ATPase protein C                                                     | Membrane Transport              | Cation transporters         | 0             | 0               | 0              | 0                | 0             | 0               | 1              | 0                |
| Mg/Co/Ni transporter MgtE / CBS domain                                                | Membrane Transport              | Membrane Transport - no     | 0             | 0               | 0              | 0                | 0             | 0               | 1              | 0                |
| Na+/H+ antiporter NhaA type                                                           | Membrane Transport              | Uni- Sym- and Antiporters   | 0             | 0               | 0              | 0                | 0             | 1               | 0              | 1                |
| Nickel ABC transporter, periplasmic nickel-binding protein NikA (TC 3.A.1.5.3)        | Membrane Transport              | Cation transporters         | 0             | 1               | 0              | 0                | 0             | 1               | 0              | 1                |
| Nickel transport ATP-binding protein NikD (TC 3.A.1.5.3)                              | Membrane Transport              | Cation transporters         | 0             | 0               | 0              | 0                | 0             | 1               | 0              | 0                |
| Nickel transport ATP-binding protein NikE (TC 3.A.1.5.3)                              | Membrane Transport              | Cation transporters         | 0             | 0               | 0              | 0                | 0             | 0               | 0              | 1                |
| Nickel transport system permease protein NikB (TC 3.A.1.5.3)                          | Membrane Transport              | Cation transporters         | 0             | 0               | 0              | 0                | 0             | 0               | 0              | 1                |

|                                                                                            | SEED CATEGORY                | SEED SUBCATEGORY            | BR7-2h- | BR7-2h- | BR21-2h- | BR21-2h- | BR7-8h- | BR7-8h- | BR21-8h- | BR21-8h- |
|--------------------------------------------------------------------------------------------|------------------------------|-----------------------------|---------|---------|----------|----------|---------|---------|----------|----------|
|                                                                                            |                              |                             | up      | down    | up       | down     | up      | down    | up       | down     |
| Chromosomal Genes (Plasmid-borne genes listed separately below)                            |                              |                             |         |         |          |          |         |         |          |          |
| Nickel transport system permease protein NikC (TC 3.A.1.5.3)                               | Membrane Transport           | Cation transporters         | 0       | 0       | 0        | 0        | 0       | 0       | 0        | 1        |
| Nucleoside permease NupC                                                                   | Membrane Transport           | Membrane Transport - no     | 0       | 0       | 0        | 0        | 0       | 0       | 0        | 1        |
| Nucleoside permease NupG                                                                   | Membrane Transport           | Membrane Transport - no     | 0       | 0       | 0        | 0        | 0       | 0       | 1        | 0        |
| Nucleoside-specific channel-forming protein Tsx precursor                                  | Membrane Transport           | nucleoside transport        | 0       | 0       | 0        | 0        | 0       | 0       | 0        | 1        |
| Oligopeptide ABC transporter, periplasmic oligopeptide-binding protein OppA (TC 3.A.1.5.1) | Membrane Transport           | ABC transporters            | 0       | 0       | 0        | 0        | 1       | 0       | 1        | 0        |
| Oligopeptide transport ATP-binding protein OppD (TC 3.A.1.5.1)                             | Membrane Transport           | ABC transporters            | 0       | 0       | 0        | 0        | 1       | 0       | 0        | 0        |
| Oligopeptide transport system permease protein OppB (TC 3.A.1.5.1)                         | Membrane Transport           | ABC transporters            | 0       | 0       | 0        | 0        | 1       | 0       | 1        | 0        |
| Oligopeptide transport system permease protein OppC (TC 3.A.1.5.1)                         | Membrane Transport           | ABC transporters            | 0       | 0       | 0        | 0        | 0       | 0       | 1        | 0        |
| Outer membrane protein C precursor                                                         | Membrane Transport           | Cation transporters         | 0       | 0       | 0        | 0        | 0       | 0       | 0        | 1        |
| Outer membrane protein X precursor                                                         | Membrane Transport           | Cation transporters         | 0       | 0       | 0        | 0        | 0       | 0       | 0        | 1        |
| PfkB family carbohydrate kinase Z5686, in cluster with transporter and aldolase            | Membrane Transport           | Membrane Transport - no     | 0       | 0       | 0        | 0        | 0       | 0       | 1        | 0        |
| Phosphoglycerate transport system sensor protein PgtB (EC 2.7.3.-)                         | Membrane Transport           | Membrane Transport - no     | 0       | 0       | 0        | 0        | 0       | 0       | 1        | 0        |
| Phosphoglycerate transport system transcriptional regulatory protein PgtA                  | Membrane Transport           | Membrane Transport - no     | 0       | 0       | 0        | 0        | 0       | 0       | 1        | 0        |
| Phosphoglycerate transporter protein PgtP                                                  | Membrane Transport           | Membrane Transport - no     | 1       | 0       | 0        | 0        | 0       | 0       | 1        | 0        |
| Phosphonate ABC transporter ATP-binding protein (TC 3.A.1.9.1)                             | Membrane Transport           | ABC transporters            | 0       | 0       | 0        | 0        | 0       | 0       | 1        | 0        |
| Phosphonate ABC transporter phosphate-binding periplasmic component (TC 3.A.1.9.1)         | Membrane Transport           | ABC transporters            | 0       | 0       | 0        | 0        | 0       | 0       | 1        | 0        |
| Predicted membrane fusion protein (MFP) component of efflux pump, membrane                 | Membrane Transport           | ABC transporters            | 0       | 0       | 0        | 0        | 0       | 0       | 1        | 0        |
| Probable glucarate transporter                                                             | Membrane Transport           | ABC transporters            | 0       | 0       | 0        | 0        | 1       | 0       | 1        | 0        |
| Probable MFS transporter                                                                   | Membrane Transport           | MFS transporter             | 0       | 0       | 0        | 0        | 0       | 0       | 0        | 1        |
| Putative ATPase component of ABC transporter with duplicated ATPase domain                 | Membrane Transport           | ABC transporters            | 0       | 0       | 0        | 0        | 0       | 0       | 0        | 1        |
| Putative Na(+)/H(+) exchanger protein, CPA1 family precursor                               | Membrane Transport           | Cation transporters         | 0       | 0       | 0        | 0        | 0       | 0       | 0        | 1        |
| Putative PerM family permease                                                              | Membrane Transport           | Membrane Transport - no     | 0       | 0       | 0        | 0        | 0       | 0       | 1        | 0        |
| Putative sugar ABC transport system, ATP-binding protein YtfR (EC 3.6.3.17)                | Membrane Transport           | ABC transporters            | 0       | 0       | 0        | 0        | 0       | 0       | 1        | 0        |
| Putative sugar ABC transport system, periplasmic binding protein YtfQ precursor            | Membrane Transport           | ABC transporters            | 0       | 0       | 0        | 0        | 0       | 0       | 1        | 0        |
| Putative sugar ABC transport system, permease protein Yjff                                 | Membrane Transport           | ABC transporters            | 0       | 0       | 0        | 0        | 0       | 0       | 1        | 0        |
| Putative sugar ABC transport system, permease protein Ytft                                 | Membrane Transport           | ABC transporters            | 0       | 0       | 0        | 0        | 0       | 0       | 1        | 0        |
| Putative sugar ABC transporter                                                             | Membrane Transport           | ABC transporters            | 0       | 0       | 0        | 0        | 0       | 0       | 1        | 0        |
| Shikimate transporter                                                                      | Membrane Transport           | MFS transporter             | 0       | 0       | 0        | 0        | 0       | 0       | 1        | 0        |
| sodium-solute symporter, putative                                                          | Membrane Transport           | Cation transporters         | 0       | 0       | 0        | 0        | 0       | 0       | 1        | 0        |
| Sugar efflux transporter SotB                                                              | Membrane Transport           | Membrane Transport - no     | 0       | 0       | 0        | 0        | 0       | 0       | 0        | 1        |
| Sugar-binding protein precursor                                                            | Membrane Transport           | Membrane Transport - no     | 0       | 0       | 0        | 0        | 0       | 0       | 1        | 0        |
| sugar-proton symporter                                                                     | Membrane Transport           | Membrane Transport - no     | 0       | 0       | 0        | 0        | 0       | 0       | 1        | 0        |
| Transcriptional activator NhaR                                                             | Membrane Transport           | Uni- Sym- and Antiporters   | 0       | 0       | 0        | 0        | 0       | 0       | 0        | 1        |
| Transporter, MFS superfamily                                                               | Membrane Transport           | MFS transporter             | 0       | 0       | 0        | 0        | 0       | 0       | 1        | 0        |
| Tryptophan-specific transport protein                                                      | Membrane Transport           | ABC transporters            | 0       | 0       | 0        | 0        | 0       | 0       | 1        | 0        |
| type 1 fimbriae major subunit FimA                                                         | Membrane Transport           | Protein secretion system, 1 | 0       | 0       | 0        | 0        | 1       | 0       | 0        | 0        |
| Type-1 fimbrial protein, A chain precursor                                                 | Membrane Transport           | Protein secretion system, 1 | 0       | 0       | 0        | 0        | 0       | 1       | 0        | 1        |
| Uncharacterized protein ImpC                                                               | Membrane Transport           | Protein secretion system, 1 | 0       | 0       | 0        | 0        | 0       | 0       | 1        | 0        |
| Uncharacterized protein similar to VCA0109                                                 | Membrane Transport           | Protein secretion system, 1 | 0       | 0       | 0        | 0        | 0       | 0       | 1        | 0        |
| 2-keto-3-deoxy-D-arabino-heptulosonate-7- phosphate synthase I alpha (EC 2.5.1.1)          | Metabolism of Aromatic Compo | Peripheral pathways for ca  | 0       | 0       | 0        | 0        | 0       | 0       | 1        | 0        |
| 2-oxo-hepta-3-ene-1,7-dioic acid hydratase (EC 4.2.-.-)                                    | Metabolism of Aromatic Compo | Metabolism of central aro   | 0       | 0       | 0        | 0        | 0       | 0       | 1        | 0        |
| 3-carboxy-cis,cis-muconate cycloisomerase (EC 5.5.1.2)                                     | Metabolism of Aromatic Compo | Metabolism of central aro   | 0       | 0       | 0        | 0        | 0       | 0       | 1        | 0        |
| 3-hydroxyacyl-CoA dehydrogenase PaaC (EC 1.1.1.-)                                          | Metabolism of Aromatic Compo | Metabolism of Aromatic C    | 0       | 0       | 0        | 0        | 0       | 0       | 1        | 0        |
| 3-oxoadipate CoA-transferase subunit A (EC 2.8.3.6)                                        | Metabolism of Aromatic Compo | Peripheral pathways for ca  | 0       | 0       | 0        | 0        | 1       | 0       | 1        | 0        |
| 4-hydroxyphenylacetate 3-monooxygenase (EC 1.14.13.3)                                      | Metabolism of Aromatic Compo | Metabolism of central aro   | 0       | 0       | 0        | 0        | 1       | 0       | 0        | 0        |
| 4-hydroxyphenylacetate symporter, major facilitator superfamily (MFS)                      | Metabolism of Aromatic Compo | Metabolism of central aro   | 0       | 0       | 0        | 0        | 1       | 0       | 1        | 0        |
| Aldehyde dehydrogenase (EC 1.2.1.3), PaaZ                                                  | Metabolism of Aromatic Compo | Metabolism of Aromatic C    | 0       | 0       | 0        | 0        | 1       | 0       | 1        | 0        |
| Beta-ketoadipate enol-lactone hydrolase (EC 3.1.1.24)                                      | Metabolism of Aromatic Compo | Peripheral pathways for ca  | 0       | 0       | 0        | 0        | 0       | 0       | 1        | 0        |
| Beta-ketoadipyl CoA thiolase (EC 2.3.1.-)                                                  | Metabolism of Aromatic Compo | Peripheral pathways for ca  | 0       | 0       | 0        | 0        | 1       | 0       | 1        | 0        |
| Mhp operon transcriptional activator                                                       | Metabolism of Aromatic Compo | Peripheral pathways for ca  | 0       | 0       | 0        | 0        | 1       | 0       | 1        | 0        |

|                                                                                     | SEED CATEGORY                  | SEED SUBCATEGORY           | BR7-2h- | BR7-2h- | BR21-2h- | BR21-2h- | BR7-8h- | BR7-8h- | BR21-8h- | BR21-8h- |
|-------------------------------------------------------------------------------------|--------------------------------|----------------------------|---------|---------|----------|----------|---------|---------|----------|----------|
|                                                                                     |                                |                            | up      | down    | up       | down     | up      | down    | up       | down     |
| Chromosomal Genes (Plasmid-borne genes listed separately below)                     |                                |                            |         |         |          |          |         |         |          |          |
| Muconate cycloisomerase (EC 5.5.1.1)                                                | Metabolism of Aromatic Compo   | Metabolism of central aro  | 0       | 0       | 0        | 0        | 1       | 0       | 1        | 0        |
| Pca regulon regulatory protein PcaR                                                 | Metabolism of Aromatic Compo   | Metabolism of central aro  | 0       | 0       | 0        | 0        | 0       | 0       | 1        | 0        |
| Phenolic acid decarboxylase (EC 4.1.1.-)                                            | Metabolism of Aromatic Compo   | Metabolism of central aro  | 0       | 0       | 0        | 0        | 1       | 0       | 1        | 0        |
| Phenylacetaldehyde dehydrogenase (EC 1.2.1.39)                                      | Metabolism of Aromatic Compo   | Metabolism of Aromatic C   | 0       | 0       | 0        | 0        | 1       | 0       | 1        | 0        |
| Phenylacetic acid degradation operon negative regulatory protein PaaX               | Metabolism of Aromatic Compo   | Metabolism of Aromatic C   | 0       | 0       | 0        | 0        | 0       | 0       | 1        | 0        |
| Phenylacetic acid degradation protein PaaY                                          | Metabolism of Aromatic Compo   | Metabolism of Aromatic C   | 0       | 0       | 0        | 0        | 0       | 0       | 1        | 0        |
| P-hydroxybenzoate hydroxylase (EC 1.14.13.2)                                        | Metabolism of Aromatic Compo   | Peripheral pathways for ca | 1       | 0       | 0        | 0        | 1       | 0       | 1        | 0        |
| Protocatechuate 3,4-dioxygenase alpha chain (EC 1.13.11.3)                          | Metabolism of Aromatic Compo   | Metabolism of central aro  | 0       | 0       | 0        | 0        | 0       | 0       | 1        | 0        |
| Protocatechuate 3,4-dioxygenase beta chain (EC 1.13.11.3)                           | Metabolism of Aromatic Compo   | Metabolism of central aro  | 0       | 0       | 0        | 0        | 1       | 0       | 1        | 0        |
| Putative carboxymethylenebutenolide (EC 3.1.1.45)                                   | Metabolism of Aromatic Compo   | Peripheral pathways for ca | 0       | 0       | 0        | 0        | 1       | 0       | 1        | 0        |
| Putative oxidoreductase YncB                                                        | Miscellaneous                  | Miscellaneous - no subcate | 0       | 0       | 0        | 0        | 0       | 0       | 1        | 0        |
| UPF0028 protein YchK aka rssA (rssB stab RpoS)                                      | Miscellaneous                  | Miscellaneous - no subcate | 0       | 0       | 0        | 0        | 0       | 0       | 1        | 0        |
| UPF0265 protein YeeX                                                                | Miscellaneous                  | Miscellaneous - no subcate | 0       | 0       | 0        | 0        | 0       | 0       | 0        | 1        |
| YbbM seven transmembrane helix protein                                              | Miscellaneous                  | Miscellaneous - no subcate | 0       | 0       | 0        | 0        | 0       | 0       | 0        | 1        |
| [Protein-Pil] uridylyltransferase (EC 2.7.7.59)                                     | Nitrogen Metabolism            | Nitrogen Metabolism - no : | 0       | 0       | 0        | 0        | 0       | 0       | 0        | 1        |
| Ammonium transporter                                                                | Nitrogen Metabolism            | Nitrogen Metabolism - no : | 0       | 1       | 0        | 0        | 0       | 1       | 0        | 0        |
| Hydroxylamine reductase (EC 1.7.-.-)                                                | Nitrogen Metabolism            | Nitrogen Metabolism - no : | 0       | 1       | 0        | 0        | 0       | 0       | 0        | 0        |
| Nitrate/nitrite response regulator protein                                          | Nitrogen Metabolism            | Nitrogen Metabolism - no : | 0       | 1       | 0        | 0        | 0       | 1       | 0        | 1        |
| Nitrate/nitrite sensor protein (EC 2.7.3.-)                                         | Nitrogen Metabolism            | Nitrogen Metabolism - no : | 0       | 1       | 0        | 0        | 0       | 1       | 0        | 1        |
| Nitrate/nitrite transporter                                                         | Nitrogen Metabolism            | Nitrogen Metabolism - no : | 0       | 1       | 0        | 0        | 0       | 1       | 0        | 1        |
| Nitrate/nitrite transporter Nark                                                    | Nitrogen Metabolism            | Denitrification            | 0       | 0       | 0        | 0        | 1       | 0       | 1        | 0        |
| Nitrite reductase [NAD(P)H] large subunit (EC 1.7.1.4)                              | Nitrogen Metabolism            | Nitrogen Metabolism - no : | 0       | 1       | 0        | 0        | 0       | 1       | 0        | 1        |
| Nitrite reductase [NAD(P)H] small subunit (EC 1.7.1.4)                              | Nitrogen Metabolism            | Nitrogen Metabolism - no : | 0       | 1       | 0        | 0        | 0       | 1       | 0        | 1        |
| Nitrogen regulatory protein P-II, glnK                                              | Nitrogen Metabolism            | Nitrogen Metabolism - no : | 0       | 0       | 0        | 0        | 0       | 1       | 0        | 0        |
| Respiratory nitrate reductase alpha chain, narG (EC 1.7.99.4)                       | Nitrogen Metabolism            | Nitrogen Metabolism - no : | 0       | 1       | 0        | 0        | 0       | 1       | 0        | 1        |
| Respiratory nitrate reductase beta chain (EC 1.7.99.4)                              | Nitrogen Metabolism            | Nitrogen Metabolism - no : | 0       | 1       | 0        | 1        | 0       | 1       | 0        | 1        |
| Respiratory nitrate reductase delta chain (EC 1.7.99.4)                             | Nitrogen Metabolism            | Nitrogen Metabolism - no : | 0       | 0       | 0        | 1        | 0       | 1       | 0        | 1        |
| Respiratory nitrate reductase gamma chain (EC 1.7.99.4)                             | Nitrogen Metabolism            | Nitrogen Metabolism - no : | 0       | 0       | 0        | 1        | 0       | 0       | 0        | 1        |
| 2',3'-cyclic-nucleotide 2'-phosphodiesterase (EC 3.1.4.16)                          | Nucleosides and Nucleotides    | Pyrimidines-Purines        | 0       | 0       | 0        | 0        | 0       | 0       | 0        | 1        |
| 5'-nucleotidase YjgG (EC 3.1.3.5)                                                   | Nucleosides and Nucleotides    | Detoxification             | 0       | 0       | 0        | 0        | 0       | 0       | 0        | 1        |
| Adenine deaminase (EC 3.5.4.2)                                                      | Nucleosides and Nucleotides    | Purines                    | 0       | 0       | 0        | 0        | 0       | 0       | 1        | 0        |
| Cytidine deaminase (EC 3.5.4.5)                                                     | Nucleosides and Nucleotides    | Pyrimidines                | 0       | 1       | 0        | 1        | 0       | 1       | 0        | 1        |
| Cytosine/purine/uracil/thiamine/allantoin permease family protein                   | Nucleosides and Nucleotides    | Purines                    | 0       | 0       | 0        | 0        | 1       | 0       | 1        | 0        |
| Deacetylases, including yeast histone deacetylase and acetoin utilization protein   | Nucleosides and Nucleotides    | Nucleosides and Nucleotid  | 0       | 0       | 1        | 0        | 1       | 0       | 1        | 0        |
| Guanine-hypoxanthine permease                                                       | Nucleosides and Nucleotides    | Purines                    | 0       | 0       | 1        | 0        | 0       | 0       | 0        | 0        |
| Guanylate kinase (EC 2.7.4.8)                                                       | Nucleosides and Nucleotides    | Purines                    | 0       | 0       | 0        | 0        | 0       | 0       | 0        | 1        |
| Hydroxymethylpyrimidine phosphate synthase ThiC (EC 4.1.99.17)                      | Nucleosides and Nucleotides    | Purines                    | 0       | 0       | 0        | 0        | 1       | 0       | 1        | 0        |
| Ribonucleotide reductase of class Ia (aerobic), alpha subunit (EC 1.17.4.1)         | Nucleosides and Nucleotides    | Nucleosides and Nucleotid  | 0       | 0       | 1        | 0        | 0       | 0       | 0        | 0        |
| Ribonucleotide reductase of class III (anaerobic), activating protein (EC 1.97.1.4) | Nucleosides and Nucleotides    | Nucleosides and Nucleotid  | 0       | 0       | 1        | 0        | 0       | 0       | 0        | 0        |
| Xanthine permease                                                                   | Nucleosides and Nucleotides    | Purines                    | 1       | 0       | 0        | 0        | 0       | 0       | 0        | 0        |
| 11 CDS (phage-related)                                                              | Phages, Prophages, Transposabl | Phages, Prophages          | 0       | 0       | 1        | 0        | 0       | 0       | 1        | 0        |
| 12 CDS (phage-related)                                                              | Phages, Prophages, Transposabl | Phages, Prophages          | 0       | 0       | 1        | 0        | 0       | 0       | 1        | 0        |
| 13 CDS (phage-related, hypothetical)                                                | Phages, Prophages, Transposabl | Phages, Prophages          | 0       | 0       | 1        | 0        | 0       | 0       | 1        | 0        |
| 14 CDS (phage-related, hypothetical)                                                | Phages, Prophages, Transposabl | Phages, Prophages          | 0       | 0       | 1        | 0        | 0       | 0       | 1        | 0        |
| 16 CDS (phage-related)                                                              | Phages, Prophages, Transposabl | Phages, Prophages          | 0       | 0       | 1        | 0        | 0       | 0       | 1        | 0        |
| Adenine DNA methyltransferase, phage-associated                                     | Phages, Prophages, Transposabl | Phages, Prophages          | 0       | 0       | 1        | 0        | 0       | 0       | 1        | 0        |
| Baseplate assembly protein J                                                        | Phages, Prophages, Transposabl | Phages, Prophages          | 0       | 0       | 0        | 0        | 0       | 0       | 1        | 0        |
| Baseplate assembly protein V                                                        | Phages, Prophages, Transposabl | Phages, Prophages          | 0       | 0       | 0        | 0        | 0       | 0       | 1        | 0        |
| COG4834: Uncharacterized protein conserved in bacteria (putative bacteriophage)     | Phages, Prophages, Transposabl | Phages, Prophages          | 1       | 0       | 1        | 0        | 0       | 0       | 1        | 0        |
| corresponds to STY3665 from Accession AL513382: Salmonella typhi CT18               | Phages, Prophages, Transposabl | Phages, Prophages          | 0       | 0       | 0        | 0        | 0       | 0       | 1        | 0        |



| Chromosomal Genes (Plasmid-borne genes listed separately below)                     | SEED CATEGORY         | SEED SUBCATEGORY          | BR7-2h- | BR7-2h- | BR21-2h- | BR21-2h- | BR7-8h- | BR7-8h- | BR21-8h- | BR21-8h- |
|-------------------------------------------------------------------------------------|-----------------------|---------------------------|---------|---------|----------|----------|---------|---------|----------|----------|
|                                                                                     |                       |                           | up      | down    | up       | down     | up      | down    | up       | down     |
| acid phosphatase                                                                    | Phosphorus Metabolism | Phosphorus Metabolism - i | 0       | 0       | 0        | 0        | 0       | 0       | 1        | 0        |
| Alkaline phosphatase (EC 3.1.3.1); PhoA                                             | Phosphorus Metabolism | Phosphorus Metabolism - i | 0       | 0       | 0        | 0        | 1       | 0       | 1        | 0        |
| Alkaline phosphatase isozyme conversion protein precursor (EC 3.4.11.-)             | Phosphorus Metabolism | Phosphorus Metabolism - i | 0       | 0       | 0        | 0        | 0       | 1       | 0        | 0        |
| Alkylphosphonate utilization operon protein PhnA                                    | Phosphorus Metabolism | Phosphorus Metabolism - i | 0       | 0       | 0        | 0        | 0       | 0       | 0        | 1        |
| Endonuclease/Exonuclease/phosphatase family protein                                 | Phosphorus Metabolism | Phosphorus Metabolism - i | 0       | 0       | 0        | 0        | 0       | 0       | 1        | 0        |
| Inorganic pyrophosphatase (EC 3.6.1.1)                                              | Phosphorus Metabolism | Phosphorus Metabolism - i | 0       | 0       | 0        | 0        | 0       | 0       | 0        | 1        |
| Inositol-1-monophosphatase (EC 3.1.3.25)                                            | Phosphorus Metabolism | Phosphorus Metabolism - i | 0       | 0       | 0        | 0        | 0       | 1       | 0        | 0        |
| Phosphate regulon sensor protein PhoR (SphS) (EC 2.7.13.3)                          | Phosphorus Metabolism | Phosphorus Metabolism - i | 0       | 0       | 0        | 0        | 0       | 0       | 1        | 0        |
| Phosphate regulon transcriptional regulatory protein PhoB (SphR)                    | Phosphorus Metabolism | Phosphorus Metabolism - i | 0       | 0       | 0        | 0        | 1       | 0       | 1        | 0        |
| Promiscuous sugar phosphatase YidA, haloacid dehalogenase-like phosphatase fan      | Phosphorus Metabolism | Phosphorus Metabolism - i | 0       | 0       | 0        | 0        | 0       | 1       | 0        | 1        |
| Soluble pyridine nucleotide transhydrogenase (EC 1.6.1.1)                           | Phosphorus Metabolism | Phosphorus Metabolism - i | 1       | 0       | 0        | 0        | 1       | 0       | 1        | 0        |
| FKBP-type peptidyl-prolyl cis-trans isomerase FkpA precursor (EC 5.2.1.8)           | Potassium metabolism  | Potassium metabolism - nc | 0       | 0       | 0        | 0        | 0       | 0       | 0        | 1        |
| FKBP-type peptidyl-prolyl cis-trans isomerase SlyD (EC 5.2.1.8)                     | Potassium metabolism  | Potassium metabolism - nc | 0       | 0       | 0        | 0        | 0       | 0       | 0        | 1        |
| Osmosensitive K+ channel histidine kinase KdpD (EC 2.7.3.-)                         | Potassium metabolism  | Potassium metabolism - nc | 0       | 0       | 0        | 0        | 0       | 1       | 0        | 1        |
| Potassium uptake protein TrkH                                                       | Potassium metabolism  | Potassium metabolism - nc | 0       | 0       | 0        | 0        | 0       | 0       | 0        | 1        |
| Potassium-transporting ATPase A chain (EC 3.6.3.12) (TC 3.A.3.7.1)                  | Potassium metabolism  | Potassium metabolism - nc | 0       | 0       | 0        | 0        | 0       | 1       | 0        | 1        |
| Potassium-transporting ATPase B chain (EC 3.6.3.12) (TC 3.A.3.7.1)                  | Potassium metabolism  | Potassium metabolism - nc | 0       | 0       | 0        | 0        | 0       | 0       | 0        | 1        |
| Potassium-transporting ATPase C chain (EC 3.6.3.12) (TC 3.A.3.7.1)                  | Potassium metabolism  | Potassium metabolism - nc | 0       | 0       | 0        | 0        | 0       | 0       | 0        | 1        |
| 16S rRNA processing protein RimM                                                    | Protein Metabolism    | Protein biosynthesis      | 0       | 0       | 0        | 0        | 0       | 0       | 0        | 1        |
| 6-carboxytetrahydropterin synthase (EC 4.1.2.50) @ Queuosine biosynthesis QueD      | Protein Metabolism    | Protein biosynthesis      | 0       | 0       | 0        | 0        | 0       | 1       | 0        | 0        |
| Acidic protein msyB                                                                 | Protein Metabolism    | Protein folding           | 0       | 0       | 0        | 0        | 1       | 0       | 1        | 0        |
| ATP-dependent Clp protease adaptor protein ClpS                                     | Protein Metabolism    | Protein degradation       | 0       | 0       | 0        | 0        | 0       | 0       | 0        | 1        |
| ATP-dependent Clp protease ATP-binding subunit ClpA                                 | Protein Metabolism    | Protein degradation       | 0       | 0       | 0        | 0        | 1       | 0       | 0        | 0        |
| Chaperone protein DnaJ                                                              | Protein Metabolism    | Protein folding           | 0       | 0       | 0        | 0        | 0       | 0       | 0        | 1        |
| Chaperone protein DnaK                                                              | Protein Metabolism    | Protein folding           | 0       | 0       | 0        | 0        | 0       | 0       | 0        | 1        |
| Chaperone protein HtpG                                                              | Protein Metabolism    | Protein folding           | 0       | 0       | 0        | 0        | 0       | 0       | 0        | 1        |
| Chaperone-modulator protein CbpM                                                    | Protein Metabolism    | Protein folding           | 0       | 0       | 0        | 0        | 0       | 0       | 1        | 0        |
| Cys-tRNA(Pro) deacylase YbaK                                                        | Protein Metabolism    | Protein biosynthesis      | 0       | 0       | 0        | 0        | 0       | 0       | 0        | 1        |
| Cytochrome c-type biogenesis protein DsbD, protein-disulfide reductase (EC 1.8.1.1) | Protein Metabolism    | Protein folding           | 0       | 0       | 0        | 0        | 0       | 0       | 0        | 1        |
| Epoxyqueuosine (oQ) reductase QueG                                                  | Protein Metabolism    | Protein biosynthesis      | 0       | 0       | 0        | 0        | 0       | 1       | 0        | 1        |
| FIG00731416: hypothetical protein                                                   | Protein Metabolism    | Selenoproteins            | 0       | 1       | 0        | 0        | 0       | 1       | 0        | 1        |
| FKBP-type peptidyl-prolyl cis-trans isomerase FkIB (EC 5.2.1.8)                     | Protein Metabolism    | Protein folding           | 0       | 0       | 0        | 0        | 0       | 0       | 0        | 1        |
| Glutaminyl-tRNA synthetase (EC 6.1.1.18)                                            | Protein Metabolism    | Protein biosynthesis      | 0       | 0       | 0        | 0        | 0       | 0       | 0        | 1        |
| Glycyl-tRNA synthetase beta chain (EC 6.1.1.14)                                     | Protein Metabolism    | Protein biosynthesis      | 0       | 0       | 0        | 0        | 0       | 0       | 0        | 1        |
| GTP-binding protein EngB                                                            | Protein Metabolism    | Protein biosynthesis      | 0       | 0       | 0        | 0        | 0       | 0       | 0        | 1        |
| GTP-binding protein Obg                                                             | Protein Metabolism    | Protein biosynthesis      | 0       | 0       | 0        | 0        | 0       | 1       | 0        | 0        |
| GTP-binding protein TypA/BipA                                                       | Protein Metabolism    | Protein biosynthesis      | 0       | 0       | 0        | 0        | 0       | 0       | 0        | 1        |
| Heat shock protein 60 family co-chaperone GroES                                     | Protein Metabolism    | Protein folding           | 0       | 0       | 0        | 0        | 0       | 0       | 0        | 1        |
| Lipoprotein signal peptidase (EC 3.4.23.36)                                         | Protein Metabolism    | Protein processing and mo | 0       | 0       | 0        | 0        | 0       | 0       | 0        | 1        |
| LSU ribosomal protein L10p (P0)                                                     | Protein Metabolism    | Protein biosynthesis      | 0       | 0       | 0        | 0        | 0       | 0       | 0        | 1        |
| LSU ribosomal protein L11p (L12e)                                                   | Protein Metabolism    | Protein biosynthesis      | 0       | 0       | 0        | 0        | 0       | 0       | 0        | 1        |
| LSU ribosomal protein L13p (L13Ae)                                                  | Protein Metabolism    | Protein biosynthesis      | 0       | 0       | 0        | 0        | 0       | 0       | 0        | 1        |
| LSU ribosomal protein L14p (L23e)                                                   | Protein Metabolism    | Protein biosynthesis      | 0       | 0       | 0        | 0        | 0       | 0       | 0        | 1        |
| LSU ribosomal protein L15p (L27Ae)                                                  | Protein Metabolism    | Protein biosynthesis      | 0       | 0       | 0        | 0        | 0       | 1       | 0        | 1        |
| LSU ribosomal protein L16p (L10e)                                                   | Protein Metabolism    | Protein biosynthesis      | 0       | 0       | 0        | 0        | 0       | 0       | 0        | 1        |
| LSU ribosomal protein L17p                                                          | Protein Metabolism    | Protein biosynthesis      | 0       | 0       | 0        | 0        | 0       | 0       | 0        | 1        |
| LSU ribosomal protein L18p (L5e)                                                    | Protein Metabolism    | Protein biosynthesis      | 0       | 0       | 0        | 0        | 0       | 1       | 0        | 1        |
| LSU ribosomal protein L19p                                                          | Protein Metabolism    | Protein biosynthesis      | 0       | 0       | 0        | 0        | 0       | 0       | 0        | 1        |
| LSU ribosomal protein L1p (L10Ae)                                                   | Protein Metabolism    | Protein biosynthesis      | 0       | 0       | 0        | 0        | 0       | 0       | 0        | 1        |
| LSU ribosomal protein L20p                                                          | Protein Metabolism    | Protein biosynthesis      | 0       | 0       | 0        | 1        | 0       | 0       | 0        | 1        |

| Chromosomal Genes (Plasmid-borne genes listed separately below)                   | SEED CATEGORY                 | SEED SUBCATEGORY          | BR7-2h-<br>up | BR7-2h-<br>down | BR21-2h-<br>up | BR21-2h-<br>down | BR7-8h-<br>up | BR7-8h-<br>down | BR21-8h-<br>up | BR21-8h-<br>down |
|-----------------------------------------------------------------------------------|-------------------------------|---------------------------|---------------|-----------------|----------------|------------------|---------------|-----------------|----------------|------------------|
| LSU ribosomal protein L22p (L17e)                                                 | Protein Metabolism            | Protein biosynthesis      | 0             | 0               | 0              | 0                | 0             | 1               | 0              | 1                |
| LSU ribosomal protein L23p (L23Ae)                                                | Protein Metabolism            | Protein biosynthesis      | 0             | 0               | 0              | 0                | 0             | 0               | 0              | 1                |
| LSU ribosomal protein L24p (L26e)                                                 | Protein Metabolism            | Protein biosynthesis      | 0             | 0               | 0              | 0                | 0             | 1               | 0              | 1                |
| LSU ribosomal protein L28p                                                        | Protein Metabolism            | Protein biosynthesis      | 0             | 0               | 0              | 0                | 0             | 0               | 0              | 1                |
| LSU ribosomal protein L2p (L8e)                                                   | Protein Metabolism            | Protein biosynthesis      | 0             | 0               | 0              | 0                | 0             | 0               | 0              | 1                |
| LSU ribosomal protein L30p (L7e)                                                  | Protein Metabolism            | Protein biosynthesis      | 0             | 0               | 0              | 0                | 0             | 0               | 0              | 1                |
| LSU ribosomal protein L31p @ LSU ribosomal protein L31p, zinc-dependent           | Protein Metabolism            | Protein biosynthesis      | 0             | 0               | 0              | 0                | 0             | 0               | 0              | 1                |
| LSU ribosomal protein L33p                                                        | Protein Metabolism            | Protein biosynthesis      | 0             | 0               | 0              | 0                | 0             | 1               | 0              | 0                |
| LSU ribosomal protein L33p @ LSU ribosomal protein L33p, zinc-independent         | Protein Metabolism            | Protein biosynthesis      | 0             | 0               | 0              | 0                | 0             | 0               | 0              | 1                |
| LSU ribosomal protein L34p                                                        | Protein Metabolism            | Protein biosynthesis      | 0             | 0               | 0              | 0                | 0             | 0               | 0              | 1                |
| LSU ribosomal protein L3p (L3e)                                                   | Protein Metabolism            | Protein biosynthesis      | 0             | 0               | 0              | 0                | 0             | 0               | 0              | 1                |
| LSU ribosomal protein L4p (L1e)                                                   | Protein Metabolism            | Protein biosynthesis      | 0             | 0               | 0              | 0                | 0             | 0               | 0              | 1                |
| LSU ribosomal protein L5p (L11e)                                                  | Protein Metabolism            | Protein biosynthesis      | 0             | 0               | 0              | 0                | 0             | 0               | 0              | 1                |
| LSU ribosomal protein L6p (L9e)                                                   | Protein Metabolism            | Protein biosynthesis      | 0             | 0               | 0              | 0                | 0             | 1               | 0              | 1                |
| LSU ribosomal protein L7/L12 (P1/P2)                                              | Protein Metabolism            | Protein biosynthesis      | 0             | 0               | 0              | 0                | 0             | 1               | 0              | 1                |
| Outer membrane usher protein                                                      | Protein Metabolism            | Protein folding           | 0             | 0               | 0              | 0                | 0             | 0               | 1              | 0                |
| Peptide chain release factor 3                                                    | Protein Metabolism            | Protein biosynthesis      | 0             | 0               | 0              | 0                | 0             | 0               | 0              | 1                |
| Phenylalanyl-tRNA synthetase alpha chain (EC 6.1.1.20)                            | Protein Metabolism            | Protein biosynthesis      | 0             | 0               | 0              | 0                | 0             | 0               | 0              | 1                |
| Phenylalanyl-tRNA synthetase beta chain (EC 6.1.1.20)                             | Protein Metabolism            | Protein biosynthesis      | 0             | 0               | 0              | 0                | 0             | 0               | 0              | 1                |
| Protease II (EC 3.4.21.83)                                                        | Protein Metabolism            | Protein degradation       | 0             | 0               | 0              | 0                | 0             | 0               | 1              | 0                |
| Putative SPFH domain protein (serine protease, homology to <i>hflc</i> )          | Protein Metabolism            | Protein degradation       | 1             | 0               | 1              | 0                | 0             | 0               | 1              | 0                |
| Ribosomal large subunit pseudouridine synthase A (EC 4.2.1.70)                    | Protein Metabolism            | Protein biosynthesis      | 0             | 0               | 0              | 0                | 0             | 0               | 0              | 1                |
| Ribosome-binding factor A                                                         | Protein Metabolism            | Protein biosynthesis      | 0             | 0               | 0              | 0                | 0             | 0               | 0              | 1                |
| Ribulosamine/erythrulosome 3-kinase potentially involved in protein deglycation   | Protein Metabolism            | Protein processing and mo | 0             | 0               | 0              | 0                | 0             | 0               | 1              | 0                |
| SSU ribosomal protein S10p (S20e)                                                 | Protein Metabolism            | Protein biosynthesis      | 0             | 0               | 0              | 0                | 0             | 0               | 0              | 1                |
| SSU ribosomal protein S14p (S29e)                                                 | Protein Metabolism            | Protein biosynthesis      | 0             | 0               | 0              | 0                | 0             | 1               | 0              | 1                |
| SSU ribosomal protein S15p (S13e)                                                 | Protein Metabolism            | Protein biosynthesis      | 0             | 0               | 0              | 0                | 0             | 1               | 0              | 1                |
| SSU ribosomal protein S16p                                                        | Protein Metabolism            | Protein biosynthesis      | 0             | 0               | 0              | 0                | 0             | 1               | 0              | 0                |
| SSU ribosomal protein S17p (S11e)                                                 | Protein Metabolism            | Protein biosynthesis      | 0             | 0               | 0              | 0                | 0             | 1               | 0              | 1                |
| SSU ribosomal protein S19p (S15e)                                                 | Protein Metabolism            | Protein biosynthesis      | 0             | 0               | 0              | 0                | 0             | 0               | 0              | 1                |
| SSU ribosomal protein S20p                                                        | Protein Metabolism            | Protein biosynthesis      | 0             | 0               | 0              | 0                | 0             | 0               | 0              | 1                |
| SSU ribosomal protein S2p (SAe)                                                   | Protein Metabolism            | Protein biosynthesis      | 0             | 0               | 0              | 0                | 0             | 0               | 0              | 1                |
| SSU ribosomal protein S3p (S3e)                                                   | Protein Metabolism            | Protein biosynthesis      | 0             | 0               | 0              | 0                | 0             | 0               | 0              | 1                |
| SSU ribosomal protein S5p (S2e)                                                   | Protein Metabolism            | Protein biosynthesis      | 0             | 0               | 0              | 0                | 0             | 0               | 0              | 1                |
| SSU ribosomal protein S6p                                                         | Protein Metabolism            | Protein biosynthesis      | 0             | 0               | 0              | 0                | 0             | 0               | 0              | 1                |
| SSU ribosomal protein S7p (S5e)                                                   | Protein Metabolism            | Protein biosynthesis      | 0             | 0               | 0              | 0                | 0             | 0               | 0              | 1                |
| SSU ribosomal protein S8p (S15Ae)                                                 | Protein Metabolism            | Protein biosynthesis      | 0             | 0               | 0              | 0                | 0             | 0               | 0              | 1                |
| SSU ribosomal protein S9p (S16e)                                                  | Protein Metabolism            | Protein biosynthesis      | 0             | 0               | 0              | 0                | 0             | 0               | 0              | 1                |
| Translation elongation factor G                                                   | Protein Metabolism            | Protein biosynthesis      | 0             | 0               | 0              | 0                | 0             | 0               | 0              | 1                |
| Translation elongation factor P                                                   | Protein Metabolism            | Protein biosynthesis      | 0             | 0               | 0              | 0                | 0             | 0               | 0              | 1                |
| Translation elongation factor Ts                                                  | Protein Metabolism            | Protein biosynthesis      | 0             | 0               | 0              | 0                | 0             | 0               | 0              | 1                |
| Translation elongation factor Tu                                                  | Protein Metabolism            | Protein biosynthesis      | 0             | 0               | 0              | 0                | 0             | 0               | 0              | 1                |
| Translation initiation factor 1                                                   | Protein Metabolism            | Protein biosynthesis      | 0             | 0               | 0              | 0                | 0             | 1               | 0              | 1                |
| Translation initiation factor 2                                                   | Protein Metabolism            | Protein biosynthesis      | 0             | 0               | 0              | 0                | 0             | 0               | 0              | 1                |
| Tripeptide aminopeptidase (EC 3.4.11.4)                                           | Protein Metabolism            | Protein degradation       | 0             | 0               | 0              | 0                | 0             | 0               | 0              | 1                |
| tRNA (Guanine37-N1) -methyltransferase (EC 2.1.1.31)                              | Protein Metabolism            | Protein biosynthesis      | 0             | 0               | 0              | 0                | 0             | 0               | 0              | 1                |
| Antiholin-like protein LrgA                                                       | Regulation and Cell signaling | Programmed Cell Death ar  | 0             | 1               | 0              | 1                | 0             | 1               | 0              | 1                |
| Autoinducer 2 (AI-2) ABC transport system, fused AI2 transporter subunits and ATP | Regulation and Cell signaling | Quorum sensing and biofil | 0             | 0               | 0              | 0                | 1             | 0               | 1              | 0                |
| Autoinducer 2 (AI-2) ABC transport system, membrane channel protein LsrC          | Regulation and Cell signaling | Quorum sensing and biofil | 0             | 0               | 0              | 0                | 1             | 0               | 1              | 0                |
| Autoinducer 2 (AI-2) ABC transport system, membrane channel protein LsrD          | Regulation and Cell signaling | Quorum sensing and biofil | 0             | 0               | 0              | 0                | 1             | 0               | 1              | 0                |

|                                                                                   | SEED CATEGORY                 | SEED SUBCATEGORY             | BR7-2h- | BR7-2h- | BR21-2h- | BR21-2h- | BR7-8h- | BR7-8h- | BR21-8h- | BR21-8h- |
|-----------------------------------------------------------------------------------|-------------------------------|------------------------------|---------|---------|----------|----------|---------|---------|----------|----------|
|                                                                                   |                               |                              | up      | down    | up       | down     | up      | down    | up       | down     |
| Chromosomal Genes (Plasmid-borne genes listed separately below)                   |                               |                              |         |         |          |          |         |         |          |          |
| Autoinducer 2 (AI-2) ABC transport system, periplasmic AI-2 binding protein LsrB  | Regulation and Cell signaling | Quorum sensing and biofil    | 0       | 0       | 0        | 0        | 1       | 0       | 1        | 0        |
| Autoinducer 2 (AI-2) aldolase LsrF (EC 4.2.1.-)                                   | Regulation and Cell signaling | Quorum sensing and biofil    | 0       | 0       | 0        | 0        | 1       | 0       | 1        | 0        |
| Autoinducer 2 (AI-2) kinase LsrK (EC 2.7.1.-)                                     | Regulation and Cell signaling | Quorum sensing and biofil    | 0       | 0       | 0        | 0        | 1       | 0       | 1        | 0        |
| Autoinducer 2 (AI-2) modifying protein LsrG                                       | Regulation and Cell signaling | Quorum sensing and biofil    | 0       | 0       | 0        | 0        | 0       | 0       | 1        | 0        |
| BAX protein                                                                       | Regulation and Cell signaling | Programmed Cell Death ar     | 0       | 0       | 0        | 0        | 0       | 0       | 1        | 0        |
| Biofilm PGA outer membrane secretin PgaA                                          | Regulation and Cell signaling | Quorum sensing and biofil    | 0       | 0       | 0        | 0        | 0       | 0       | 1        | 0        |
| biofilm regulator BssR                                                            | Regulation and Cell signaling | Quorum sensing and biofil    | 0       | 0       | 0        | 0        | 0       | 0       | 1        | 0        |
| CidA-associated membrane protein CidB                                             | Regulation and Cell signaling | Programmed Cell Death ar     | 0       | 1       | 0        | 1        | 0       | 1       | 0        | 1        |
| Death on curing protein, Doc toxin                                                | Regulation and Cell signaling | Programmed Cell Death ar     | 1       | 0       | 0        | 0        | 0       | 0       | 0        | 0        |
| DNA transformation protein TfoX                                                   | Regulation and Cell signaling | Regulation and Cell signalir | 0       | 0       | 0        | 0        | 1       | 0       | 1        | 0        |
| DNA-binding capsular synthesis response regulator RcsB                            | Regulation and Cell signaling | Regulation and Cell signalir | 0       | 0       | 0        | 0        | 0       | 0       | 1        | 0        |
| Holin-like protein CidA                                                           | Regulation and Cell signaling | Programmed Cell Death ar     | 0       | 1       | 0        | 1        | 0       | 1       | 0        | 1        |
| Hybrid sensory histidine kinase in two-component regulatory system with EvgA      | Regulation and Cell signaling | Regulation and Cell signalir | 0       | 0       | 0        | 0        | 0       | 1       | 0        | 1        |
| LrgA-associated membrane protein LrgB                                             | Regulation and Cell signaling | Programmed Cell Death ar     | 0       | 1       | 0        | 1        | 0       | 1       | 0        | 1        |
| LsrR, transcriptional repressor of Lsr operon                                     | Regulation and Cell signaling | Quorum sensing and biofil    | 0       | 0       | 0        | 0        | 1       | 0       | 1        | 0        |
| LysR family transcriptional regulator near succinyl-CoA:3-ketoacid-coenzyme A tra | Regulation and Cell signaling | Regulation and Cell signalir | 1       | 0       | 0        | 0        | 1       | 0       | 1        | 0        |
| LysR family transcriptional regulator STM3121                                     | Regulation and Cell signaling | Regulation and Cell signalir | 0       | 0       | 0        | 0        | 0       | 0       | 0        | 1        |
| LysR family transcriptional regulator Ydcl                                        | Regulation and Cell signaling | Regulation and Cell signalir | 1       | 0       | 0        | 0        | 1       | 0       | 1        | 0        |
| LysR family transcriptional regulator YfiE                                        | Regulation and Cell signaling | Regulation and Cell signalir | 0       | 0       | 0        | 0        | 0       | 0       | 0        | 1        |
| Phosphohistidine phosphatase SixA                                                 | Regulation and Cell signaling | Regulation and Cell signalir | 0       | 0       | 0        | 0        | 0       | 0       | 1        | 0        |
| Positive transcription regulator EvgA                                             | Regulation and Cell signaling | Regulation and Cell signalir | 0       | 0       | 0        | 0        | 0       | 1       | 0        | 0        |
| putative sensory transduction regulator                                           | Regulation and Cell signaling | Regulation and Cell signalir | 0       | 0       | 0        | 0        | 0       | 1       | 0        | 0        |
| putative two-component response regulator transcriptional regulatory protein      | Regulation and Cell signaling | Regulation and Cell signalir | 0       | 0       | 0        | 0        | 0       | 0       | 1        | 0        |
| sensor histidine kinase                                                           | Regulation and Cell signaling | Regulation and Cell signalir | 0       | 0       | 0        | 0        | 0       | 1       | 0        | 0        |
| Sensory histidine kinase in two-component regulatory system with RstA             | Regulation and Cell signaling | Regulation and Cell signalir | 0       | 0       | 0        | 0        | 0       | 0       | 0        | 1        |
| Threonine catabolic operon transcriptional activator TdcA                         | Regulation and Cell signaling | Regulation and Cell signalir | 0       | 0       | 0        | 0        | 0       | 0       | 1        | 0        |
| Transcriptional activator protein LysR                                            | Regulation and Cell signaling | Regulation and Cell signalir | 0       | 0       | 0        | 0        | 1       | 0       | 1        | 0        |
| Type IV secretory pathway, VirB4 components                                       | Regulation and Cell signaling | Regulation and Cell signalir | 0       | 0       | 0        | 0        | 0       | 0       | 1        | 0        |
| Zinc uptake regulation protein ZUR                                                | Regulation and Cell signaling | Regulation and Cell signalir | 0       | 0       | 0        | 0        | 0       | 0       | 0        | 1        |
| [NiFe] hydrogenase metalcenter assembly protein HypD                              | Respiration                   | Electron donating reaction   | 0       | 1       | 0        | 0        | 0       | 0       | 0        | 0        |
| Aerobic C4-dicarboxylate transporter for fumarate, L-malate, D-malate, succinate  | Respiration                   | Electron accepting reactio   | 0       | 0       | 0        | 0        | 1       | 0       | 1        | 0        |
| ATP synthase protein I                                                            | Respiration                   | Respiration - no subcatego   | 0       | 0       | 0        | 1        | 0       | 0       | 0        | 0        |
| ATPase domain protein                                                             | Respiration                   | Respiration - no subcatego   | 0       | 0       | 0        | 0        | 0       | 0       | 0        | 1        |
| Benzoate 1,2-dioxygenase (EC 1.14.12.10)                                          | Respiration                   | Electron donating reaction   | 0       | 0       | 0        | 0        | 1       | 0       | 1        | 0        |
| benzyl alcohol dehydrogenase                                                      | Respiration                   | Electron donating reaction   | 0       | 0       | 0        | 0        | 1       | 0       | 1        | 0        |
| C4-dicarboxylate transport protein                                                | Respiration                   | Electron accepting reactio   | 0       | 0       | 0        | 0        | 0       | 1       | 0        | 1        |
| C4-dicarboxylate transporter DcuB                                                 | Respiration                   | Electron accepting reactio   | 1       | 0       | 0        | 0        | 0       | 0       | 0        | 0        |
| Cytochrome b(561)                                                                 | Respiration                   | Respiration - no subcatego   | 0       | 0       | 0        | 0        | 0       | 0       | 1        | 0        |
| Electron transport complex protein RnfA                                           | Respiration                   | Electron donating reaction   | 0       | 0       | 0        | 0        | 0       | 1       | 0        | 0        |
| Electron transport protein HydN                                                   | Respiration                   | Electron donating reaction   | 0       | 0       | 0        | 0        | 0       | 0       | 0        | 1        |
| Ferredoxin reductase                                                              | Respiration                   | Electron accepting reactio   | 0       | 0       | 0        | 0        | 1       | 0       | 1        | 0        |
| FMN oxidoreductase                                                                | Respiration                   | Respiration - no subcatego   | 0       | 0       | 0        | 0        | 0       | 0       | 1        | 0        |
| Formate dehydrogenase N alpha subunit (EC 1.2.1.2) @ selenocysteine-containing    | Respiration                   | Electron donating reaction   | 0       | 0       | 0        | 1        | 0       | 1       | 0        | 1        |
| Formate dehydrogenase N gamma subunit (EC 1.2.1.2)                                | Respiration                   | Electron donating reaction   | 0       | 0       | 0        | 1        | 0       | 1       | 0        | 1        |
| Formate hydrogenlyase subunit 7                                                   | Respiration                   | Respiration - no subcatego   | 0       | 0       | 0        | 0        | 0       | 0       | 0        | 1        |
| Formate hydrogenlyase transcriptional activator                                   | Respiration                   | Respiration - no subcatego   | 0       | 0       | 0        | 0        | 1       | 0       | 0        | 0        |
| Fumarate reductase flavoprotein subunit (EC 1.3.99.1)                             | Respiration                   | Electron donating reaction   | 0       | 0       | 1        | 0        | 0       | 0       | 1        | 0        |
| fumarate reductase/succinate dehydrogenase flavoprotein domain protein            | Respiration                   | Electron donating reaction   | 0       | 0       | 0        | 0        | 0       | 0       | 1        | 0        |
| Hydrogenase 3 maturation protease (EC 3.4.-.-)                                    | Respiration                   | Electron donating reaction   | 0       | 0       | 0        | 0        | 0       | 0       | 0        | 1        |
| L-2-hydroxyglutarate oxidase (EC 1.1.3.15) (gaba operon, ygaF)                    | Respiration                   | Electron donating reaction   | 1       | 0       | 0        | 0        | 1       | 0       | 1        | 0        |



|                                                                                | SEED CATEGORY   | SEED SUBCATEGORY           | BR7-2h- | BR7-2h- | BR21-2h- | BR21-2h- | BR7-8h- | BR7-8h- | BR21-8h- | BR21-8h- |
|--------------------------------------------------------------------------------|-----------------|----------------------------|---------|---------|----------|----------|---------|---------|----------|----------|
|                                                                                |                 |                            | up      | down    | up       | down     | up      | down    | up       | down     |
| Chromosomal Genes (Plasmid-borne genes listed separately below)                |                 |                            |         |         |          |          |         |         |          |          |
| NAD(P)H-flavin oxidoreductase                                                  | Respiration     | Electron donating reaction | 0       | 0       | 0        | 0        | 0       | 0       | 1        | 0        |
| NAD(P)HX epimerase / NAD(P)HX dehydratase                                      | Respiration     | Electron donating reaction | 0       | 0       | 0        | 0        | 0       | 0       | 1        | 0        |
| NADH dehydrogenase (EC 1.6.99.3)                                               | Respiration     | Electron donating reaction | 0       | 0       | 0        | 0        | 0       | 1       | 0        | 1        |
| NADH-ubiquinone oxidoreductase chain E (EC 1.6.5.3)                            | Respiration     | Electron donating reaction | 0       | 0       | 0        | 0        | 0       | 0       | 1        | 0        |
| NADH-ubiquinone oxidoreductase chain K (EC 1.6.5.3)                            | Respiration     | Electron donating reaction | 0       | 0       | 0        | 0        | 0       | 0       | 1        | 0        |
| NADH-ubiquinone oxidoreductase chain M (EC 1.6.5.3)                            | Respiration     | Electron donating reaction | 0       | 0       | 0        | 0        | 0       | 0       | 1        | 0        |
| NADPH-dependent broad range aldehyde dehydrogenase YqhD                        | Respiration     | Electron donating reaction | 0       | 0       | 0        | 0        | 0       | 0       | 0        | 1        |
| Putative cytochrome C-type biogenesis protein                                  | Respiration     | Respiration - no subcatego | 0       | 0       | 0        | 0        | 0       | 0       | 0        | 1        |
| Putative ion-channel protein                                                   | Respiration     | Electron donating reaction | 0       | 1       | 0        | 0        | 0       | 1       | 0        | 0        |
| Rieske (2Fe-2S) protein (Vanillate-O-demethylase oxygenase)                    | Respiration     | Electron donating reaction | 1       | 0       | 0        | 0        | 1       | 0       | 1        | 0        |
| short chain dehydrogenase                                                      | Respiration     | Electron donating reaction | 0       | 0       | 1        | 0        | 0       | 0       | 1        | 0        |
| Short-chain dehydrogenase/reductase SDR                                        | Respiration     | Electron donating reaction | 0       | 0       | 0        | 0        | 1       | 0       | 1        | 0        |
| Soluble aldose sugar dehydrogenase, PQQ-dependent (EC 1.1.5.-)                 | Respiration     | Electron donating reaction | 0       | 0       | 0        | 0        | 0       | 0       | 1        | 0        |
| Succinate dehydrogenase cytochrome b-556 subunit; SdhC                         | Respiration     | Electron donating reaction | 1       | 0       | 0        | 0        | 1       | 0       | 1        | 0        |
| Succinate dehydrogenase hydrophobic membrane anchor protein                    | Respiration     | Electron donating reaction | 1       | 0       | 0        | 0        | 1       | 0       | 1        | 0        |
| Succinate-semialdehyde dehydrogenase [NAD] (EC 1.2.1.24); Succinate-semialdehy | Respiration     | Electron donating reaction | 0       | 0       | 0        | 0        | 0       | 0       | 1        | 0        |
| Vanillate O-demethylase oxidoreductase (EC 1.14.13.-)                          | Respiration     | Electron accepting reactio | 0       | 0       | 0        | 0        | 1       | 0       | 1        | 0        |
| Vanillate O-demethylase oxygenase subunit (EC 1.14.13.82)                      | Respiration     | Electron donating reaction | 1       | 0       | 0        | 0        | 1       | 0       | 1        | 0        |
| 16S rRNA (guanine(966)-N(2))-methyltransferase (EC 2.1.1.171)                  | RNA Metabolism  | RNA processing and modifi  | 0       | 0       | 0        | 0        | 0       | 0       | 0        | 1        |
| 3'-to-5' oligoribonuclease (orn)                                               | RNA Metabolism  | RNA processing and modifi  | 0       | 0       | 0        | 0        | 0       | 0       | 0        | 1        |
| ATP-dependent 23S rRNA helicase DbpA                                           | RNA Metabolism  | RNA processing and modifi  | 0       | 0       | 0        | 0        | 0       | 0       | 1        | 0        |
| ATP-dependent helicase HrpB                                                    | RNA Metabolism  | RNA processing and modifi  | 0       | 0       | 0        | 0        | 0       | 0       | 0        | 1        |
| ATP-dependent RNA helicase RhlE                                                | RNA Metabolism  | RNA processing and modifi  | 0       | 0       | 0        | 0        | 0       | 1       | 0        | 1        |
| COG2197: Response regulator containing a CheY-like receiver domain and an HTH  | RNA Metabolism  | Transcription              | 0       | 0       | 0        | 0        | 0       | 1       | 0        | 0        |
| DEAD-box ATP-dependent RNA helicase CshA (EC 3.6.4.13)                         | RNA Metabolism  | RNA processing and modifi  | 0       | 0       | 0        | 1        | 0       | 1       | 0        | 1        |
| DNA-directed RNA polymerase alpha subunit (EC 2.7.7.6)                         | RNA Metabolism  | Transcription              | 0       | 0       | 0        | 0        | 0       | 0       | 0        | 1        |
| FIG004454: RNA binding protein                                                 | RNA Metabolism  | RNA processing and modifi  | 0       | 0       | 0        | 0        | 0       | 0       | 0        | 1        |
| FIG136845: Rhodanese-related sulfurtransferase                                 | RNA Metabolism  | RNA processing and modifi  | 0       | 0       | 0        | 0        | 0       | 0       | 0        | 1        |
| Iron-sulfur cluster assembly ATPase protein SufC                               | RNA Metabolism  | RNA processing and modifi  | 0       | 0       | 0        | 0        | 0       | 0       | 1        | 0        |
| Iron-sulfur cluster assembly protein SufB                                      | RNA Metabolism  | RNA processing and modifi  | 0       | 0       | 0        | 0        | 0       | 0       | 1        | 0        |
| Iron-sulfur cluster assembly protein SufD                                      | RNA Metabolism  | RNA processing and modifi  | 0       | 0       | 0        | 0        | 0       | 0       | 1        | 0        |
| O-methyltransferase                                                            | RNA Metabolism  | RNA processing and modifi  | 0       | 0       | 0        | 0        | 0       | 0       | 1        | 0        |
| Polyribonucleotide nucleotidyltransferase (EC 2.7.7.8)                         | RNA Metabolism  | RNA processing and modifi  | 0       | 0       | 0        | 0        | 0       | 0       | 0        | 1        |
| probable ribonuclease inhibitor YPO3690                                        | RNA Metabolism  | RNA processing and modifi  | 0       | 0       | 0        | 0        | 1       | 0       | 1        | 0        |
| Protein export cytoplasm protein SecA ATPase RNA helicase (TC 3.A.5.1.1)       | RNA Metabolism  | RNA processing and modifi  | 0       | 0       | 0        | 0        | 0       | 0       | 0        | 1        |
| Putative ATP-dependent helicase                                                | RNA Metabolism  | RNA processing and modifi  | 0       | 0       | 1        | 0        | 0       | 0       | 1        | 0        |
| Putative preQ0 transporter                                                     | RNA Metabolism  | RNA processing and modifi  | 0       | 0       | 0        | 0        | 0       | 0       | 1        | 0        |
| Regulator of sigma D                                                           | RNA Metabolism  | Transcription              | 0       | 0       | 0        | 0        | 1       | 0       | 1        | 0        |
| Ribonuclease HI (EC 3.1.26.4)                                                  | RNA Metabolism  | RNA processing and modifi  | 0       | 0       | 0        | 0        | 0       | 0       | 0        | 1        |
| RNA polymerase sigma factor RpoS                                               | RNA Metabolism  | Transcription              | 0       | 0       | 0        | 0        | 1       | 0       | 1        | 0        |
| rRNA small subunit methyltransferase J                                         | RNA Metabolism  | RNA processing and modifi  | 0       | 0       | 0        | 0        | 0       | 0       | 0        | 1        |
| Transcription termination protein NusA                                         | RNA Metabolism  | Transcription              | 0       | 0       | 0        | 0        | 0       | 1       | 0        | 1        |
| tRNA (guanosine(18)-2'-O)-methyltransferase (EC 2.1.1.34)                      | RNA Metabolism  | RNA processing and modifi  | 0       | 0       | 0        | 0        | 0       | 0       | 0        | 1        |
| tRNA dihydrouridine synthase B (EC 1.-.-.-)                                    | RNA Metabolism  | RNA processing and modifi  | 0       | 0       | 0        | 0        | 0       | 1       | 0        | 0        |
| tRNA/RNA cytosine-C5-methylase (EC 2.1.1.-)                                    | RNA Metabolism  | RNA processing and modifi  | 0       | 0       | 0        | 0        | 0       | 1       | 0        | 0        |
| Carbon starvation induced protein CsiD                                         | Stress Response | Stress Response - no subca | 1       | 0       | 0        | 0        | 1       | 0       | 1        | 0        |
| Catalase (EC 1.11.1.6)                                                         | Stress Response | Oxidative stress           | 0       | 0       | 0        | 0        | 1       | 0       | 1        | 0        |
| Cell wall endopeptidase, family M23/M37                                        | Stress Response | Oxidative stress           | 0       | 0       | 0        | 0        | 0       | 0       | 1        | 0        |
| Choline-glycine betaine transporter                                            | Stress Response | Osmotic stress             | 0       | 0       | 0        | 0        | 1       | 0       | 1        | 0        |
| Cold shock protein CspA                                                        | Stress Response | Cold shock                 | 0       | 0       | 0        | 1        | 0       | 1       | 0        | 1        |

| Chromosomal Genes (Plasmid-borne genes listed separately below)                     | SEED CATEGORY   | SEED SUBCATEGORY           | BR7-2h- | BR7-2h- | BR21-2h- | BR21-2h- | BR7-8h- | BR7-8h- | BR21-8h- | BR21-8h- |
|-------------------------------------------------------------------------------------|-----------------|----------------------------|---------|---------|----------|----------|---------|---------|----------|----------|
|                                                                                     |                 |                            | up      | down    | up       | down     | up      | down    | up       | down     |
| Cold shock protein CspD                                                             | Stress Response | Cold shock                 | 1       | 0       | 0        | 0        | 1       | 0       | 1        | 0        |
| DedA family inner membrane protein YdjX                                             | Stress Response | Osmotic stress             | 0       | 0       | 0        | 0        | 0       | 1       | 0        | 1        |
| DedA family inner membrane protein YghB                                             | Stress Response | Osmotic stress             | 0       | 0       | 0        | 0        | 0       | 0       | 0        | 1        |
| Entericidin B precursor; entB                                                       | Stress Response | Osmotic stress             | 0       | 0       | 0        | 0        | 0       | 0       | 1        | 0        |
| FIG005189: putative transferase clustered with tellurite resistance proteins TehA/T | Stress Response | Detoxification             | 0       | 0       | 0        | 0        | 1       | 0       | 1        | 0        |
| FOG: GGDEF domain                                                                   | Stress Response | Stress Response - no subca | 0       | 0       | 0        | 0        | 0       | 0       | 1        | 0        |
| Gamma-glutamyltranspeptidase (EC 2.3.2.2)                                           | Stress Response | Oxidative stress           | 0       | 0       | 0        | 0        | 1       | 0       | 1        | 0        |
| General stress protein 18                                                           | Stress Response | Stress Response - no subca | 0       | 0       | 0        | 0        | 1       | 0       | 1        | 0        |
| GGDEF family protein                                                                | Stress Response | Stress Response - no subca | 0       | 0       | 0        | 0        | 0       | 0       | 1        | 0        |
| Glutathione peroxidase family protein                                               | Stress Response | Oxidative stress           | 0       | 0       | 0        | 0        | 0       | 0       | 1        | 0        |
| Glutathione reductase (EC 1.8.1.7)                                                  | Stress Response | Oxidative stress           | 0       | 0       | 0        | 0        | 0       | 0       | 0        | 1        |
| Glutathione S-transferase (EC 2.5.1.18)                                             | Stress Response | Oxidative stress           | 0       | 0       | 0        | 0        | 0       | 0       | 1        | 0        |
| Glutathione S-transferase, omega (EC 2.5.1.18)                                      | Stress Response | Oxidative stress           | 0       | 0       | 0        | 0        | 1       | 0       | 1        | 0        |
| Glutathione S-transferase, theta (EC 2.5.1.18)                                      | Stress Response | Oxidative stress           | 0       | 0       | 0        | 0        | 1       | 0       | 1        | 0        |
| Heat shock protein hslJ                                                             | Stress Response | Heat shock                 | 0       | 0       | 0        | 0        | 0       | 1       | 0        | 1        |
| Hnr protein; rssB homolog                                                           | Stress Response | Stress Response - no subca | 0       | 0       | 0        | 0        | 0       | 0       | 1        | 0        |
| L-proline glycine betaine ABC transport system permease protein ProV (TC 3.A.1.1)   | Stress Response | Osmotic stress             | 0       | 0       | 0        | 0        | 0       | 0       | 1        | 0        |
| L-proline glycine betaine binding ABC transporter protein ProX (TC 3.A.1.12.1)      | Stress Response | Osmotic stress             | 0       | 0       | 0        | 0        | 0       | 0       | 1        | 0        |
| Manganese catalase (EC 1.11.1.6)                                                    | Stress Response | Oxidative stress           | 0       | 0       | 0        | 0        | 0       | 0       | 1        | 0        |
| Membrane-bound metal-dependent hydrolase YdjM, induced during SOS response          | Stress Response | Stress Response - no subca | 0       | 0       | 0        | 0        | 0       | 1       | 0        | 0        |
| Nitrogen regulation protein NtrB (EC 2.7.13.3) (aka glnL)                           | Stress Response | Stress Response - no subca | 0       | 0       | 0        | 0        | 0       | 1       | 0        | 1        |
| Nitrogen regulation protein NtrC (aka glnG)                                         | Stress Response | Stress Response - no subca | 0       | 0       | 0        | 0        | 0       | 0       | 0        | 1        |
| Non-heme chloroperoxidase (EC 1.11.1.10)                                            | Stress Response | Oxidative stress           | 0       | 0       | 0        | 0        | 1       | 0       | 1        | 0        |
| NtrC family Transcriptional regulator, ATPase domain                                | Stress Response | Stress Response - no subca | 0       | 0       | 0        | 0        | 1       | 0       | 0        | 0        |
| Osmoprotectant ABC transporter ATP-binding subunit YehX                             | Stress Response | Osmotic stress             | 0       | 0       | 0        | 0        | 0       | 0       | 1        | 0        |
| Osmoprotectant ABC transporter binding protein YehZ                                 | Stress Response | Osmotic stress             | 0       | 0       | 0        | 0        | 1       | 0       | 1        | 0        |
| Osmoprotectant ABC transporter inner membrane protein YehW                          | Stress Response | Osmotic stress             | 0       | 0       | 0        | 0        | 0       | 0       | 1        | 0        |
| Osmoprotectant ABC transporter permease protein YehY                                | Stress Response | Osmotic stress             | 0       | 0       | 0        | 0        | 0       | 0       | 1        | 0        |
| Osmotically inducible lipoprotein B precursor: OsmB                                 | Stress Response | Osmotic stress             | 0       | 0       | 0        | 0        | 0       | 0       | 1        | 0        |
| Osmotically inducible lipoprotein E precursor OsmE                                  | Stress Response | Osmotic stress             | 0       | 0       | 0        | 0        | 1       | 0       | 1        | 0        |
| Osmotically inducible protein C OsmC                                                | Stress Response | Osmotic stress             | 0       | 0       | 0        | 0        | 1       | 0       | 1        | 0        |
| Osmotically inducible protein OsmY                                                  | Stress Response | Osmotic stress             | 0       | 0       | 0        | 0        | 1       | 0       | 1        | 0        |
| Outer membrane lipoprotein blc precursor                                            | Stress Response | Osmotic stress             | 0       | 0       | 0        | 0        | 1       | 0       | 1        | 0        |
| Phosphate starvation-inducible protein PsiF                                         | Stress Response | Stress Response - no subca | 0       | 0       | 0        | 0        | 1       | 0       | 1        | 0        |
| Probable glutathione S-transferase (EC 2.5.1.18), YfcG homolog                      | Stress Response | Oxidative stress           | 0       | 0       | 0        | 0        | 0       | 0       | 1        | 0        |
| Probable protease HtpX (EC 3.4.24.-)                                                | Stress Response | Stress Response - no subca | 0       | 0       | 0        | 0        | 0       | 0       | 1        | 0        |
| Protein involved in stability of MscS mechanosensitive channel                      | Stress Response | Osmotic stress             | 0       | 0       | 0        | 0        | 0       | 0       | 0        | 1        |
| protein iraP                                                                        | Stress Response | Stress Response - no subca | 0       | 0       | 0        | 0        | 1       | 0       | 1        | 0        |
| Protein sprT                                                                        | Stress Response | Stress Response - no subca | 0       | 0       | 0        | 0        | 0       | 1       | 0        | 1        |
| Putative ThuR, regulatory protein for trehalose/maltose transport                   | Stress Response | Stress Response - no subca | 0       | 0       | 0        | 0        | 0       | 0       | 0        | 1        |
| Regulatory protein SoxS                                                             | Stress Response | Oxidative stress           | 0       | 0       | 1        | 0        | 0       | 0       | 0        | 0        |
| Regulatory protein soxS                                                             | Stress Response | Oxidative stress           | 0       | 1       | 0        | 1        | 0       | 1       | 0        | 1        |
| Rtn protein                                                                         | Stress Response | Stress Response - no subca | 0       | 0       | 0        | 0        | 0       | 0       | 1        | 0        |
| Senescence marker protein-30                                                        | Stress Response | Oxidative stress           | 0       | 0       | 0        | 0        | 0       | 0       | 1        | 0        |
| Sensory box/GGDEF family protein                                                    | Stress Response | Stress Response - no subca | 0       | 0       | 0        | 0        | 0       | 0       | 1        | 0        |
| Small heat shock protein                                                            | Stress Response | Heat shock                 | 0       | 0       | 0        | 0        | 1       | 0       | 1        | 0        |
| Starvation lipoprotein Slp paralog                                                  | Stress Response | Stress Response - no subca | 0       | 0       | 0        | 0        | 0       | 0       | 0        | 1        |
| Stationary phase inducible protein CsiE                                             | Stress Response | Stress Response - no subca | 0       | 0       | 0        | 0        | 1       | 0       | 1        | 0        |
| Superoxide dismutase [Cu-Zn] precursor (EC 1.15.1.1)                                | Stress Response | Oxidative stress           | 0       | 0       | 0        | 0        | 0       | 0       | 1        | 0        |
| Superoxide dismutase [Fe] (EC 1.15.1.1)                                             | Stress Response | Oxidative stress           | 0       | 0       | 0        | 0        | 0       | 0       | 1        | 0        |

| Chromosomal Genes (Plasmid-borne genes listed separately below)                     | SEED CATEGORY     | SEED SUBCATEGORY            | BR7-2h- | BR7-2h- | BR21-2h- | BR21-2h- | BR7-8h- | BR7-8h- | BR21-8h- | BR21-8h- |
|-------------------------------------------------------------------------------------|-------------------|-----------------------------|---------|---------|----------|----------|---------|---------|----------|----------|
|                                                                                     |                   |                             | up      | down    | up       | down     | up      | down    | up       | down     |
| Thioredoxin 2 (EC 1.8.1.8); TrxC                                                    | Stress Response   | Oxidative stress            | 1       | 0       | 0        | 0        | 1       | 0       | 1        | 0        |
| Transcriptional activator RamA                                                      | Stress Response   | Stress Response - no subca  | 0       | 0       | 0        | 0        | 0       | 0       | 1        | 0        |
| Transcriptional regulator, IclR family                                              | Stress Response   | Stress Response - no subca  | 1       | 0       | 0        | 0        | 1       | 0       | 1        | 0        |
| TsgA protein homolog                                                                | Stress Response   | Detoxification              | 0       | 0       | 0        | 0        | 0       | 0       | 0        | 1        |
| Uncharacterized membrane lipoprotein clustered with tellurite resistance proteins   | Stress Response   | Detoxification              | 0       | 0       | 0        | 0        | 0       | 0       | 1        | 0        |
| Uncharacterized protein YqjB                                                        | Stress Response   | Stress Response - no subca  | 0       | 0       | 0        | 0        | 0       | 1       | 0        | 1        |
| Universal stress protein B                                                          | Stress Response   | Stress Response - no subca  | 0       | 0       | 0        | 0        | 1       | 0       | 1        | 0        |
| Universal stress protein F                                                          | Stress Response   | Stress Response - no subca  | 0       | 0       | 0        | 0        | 0       | 0       | 1        | 0        |
| UPF0337 protein - YjbJ-unchar general stress protein                                | Stress Response   | Stress Response - no subca  | 0       | 0       | 0        | 0        | 1       | 0       | 1        | 0        |
| Arylsulfatase (EC 3.1.6.1)                                                          | Sulfur Metabolism | Sulfur Metabolism - no sub  | 0       | 0       | 0        | 0        | 0       | 0       | 0        | 1        |
| Bacterial luciferase family protein YtmO, in cluster with L-cystine ABC transporter | Sulfur Metabolism | Organic sulfur assimilation | 0       | 0       | 0        | 0        | 0       | 0       | 1        | 0        |
| L-cystine uptake protein TcyP                                                       | Sulfur Metabolism | Organic sulfur assimilation | 0       | 0       | 0        | 0        | 0       | 1       | 0        | 1        |
| Putative thiosulfate sulfurtransferase ynjE (EC 2.8.1.1)                            | Sulfur Metabolism | Sulfur Metabolism - no sub  | 0       | 0       | 0        | 0        | 0       | 0       | 0        | 1        |
| ATP-dependent DNA helicase RecG (EC 3.6.1.-)                                        | Uncharacterized   | Uncharacterized             | 0       | 0       | 0        | 0        | 0       | 0       | 0        | 1        |
| Bacterioferritin-associated ferredoxin                                              | Uncharacterized   | Uncharacterized             | 0       | 0       | 0        | 0        | 0       | 0       | 1        | 0        |
| COG1683: Uncharacterized conserved protein / FIG143828: Hypothetical protein \      | Uncharacterized   | Uncharacterized             | 0       | 0       | 0        | 1        | 0       | 0       | 0        | 0        |
| corresponds to STY2919 from Accession AL513382: Salmonella typhi CT18               | Uncharacterized   | Uncharacterized             | 0       | 0       | 0        | 0        | 1       | 0       | 1        | 0        |
| corresponds to STY3950 from Accession AL513382: Salmonella typhi CT18               | Uncharacterized   | Uncharacterized             | 0       | 0       | 0        | 0        | 0       | 0       | 1        | 0        |
| Exoenzymes regulatory protein AepA precursor                                        | Uncharacterized   | uncharacterized regulatory  | 0       | 0       | 0        | 0        | 0       | 0       | 1        | 0        |
| FIG002095: hypothetical protein                                                     | Uncharacterized   | Uncharacterized             | 0       | 0       | 0        | 0        | 0       | 0       | 1        | 0        |
| FIG002337: predicted inner membrane protein                                         | Uncharacterized   | Uncharacterized             | 0       | 0       | 0        | 0        | 0       | 0       | 1        | 0        |
| FIG002958: hypothetical protein                                                     | Uncharacterized   | Uncharacterized             | 0       | 0       | 0        | 0        | 0       | 0       | 0        | 1        |
| FIG002994: Putative transcriptional regulator                                       | Uncharacterized   | uncharacterized regulatory  | 0       | 0       | 0        | 1        | 0       | 0       | 0        | 1        |
| FIG004088: inner membrane protein YebE                                              | Uncharacterized   | Uncharacterized             | 0       | 0       | 0        | 0        | 0       | 1       | 0        | 0        |
| FIG004405: Putative cytoplasmic protein                                             | Uncharacterized   | Uncharacterized             | 0       | 0       | 0        | 0        | 0       | 0       | 1        | 0        |
| FIG00509904: hypothetical protein                                                   | Uncharacterized   | Uncharacterized             | 0       | 0       | 0        | 0        | 0       | 1       | 0        | 0        |
| FIG00510911: hypothetical protein                                                   | Uncharacterized   | Uncharacterized             | 0       | 0       | 0        | 0        | 1       | 0       | 1        | 0        |
| FIG005119: putative inner membrane protein                                          | Uncharacterized   | Uncharacterized             | 0       | 0       | 0        | 0        | 1       | 0       | 0        | 0        |
| FIG005274: hypothetical protein                                                     | Uncharacterized   | Uncharacterized             | 0       | 0       | 0        | 0        | 0       | 0       | 1        | 0        |
| FIG00543870: hypothetical protein                                                   | Uncharacterized   | Uncharacterized             | 0       | 0       | 0        | 0        | 1       | 0       | 1        | 0        |
| FIG00554739: membrane protein YchH                                                  | Uncharacterized   | Uncharacterized             | 0       | 0       | 0        | 0        | 0       | 0       | 1        | 0        |
| FIG00613201: hypothetical protein                                                   | Uncharacterized   | Uncharacterized             | 0       | 0       | 0        | 0        | 0       | 0       | 0        | 1        |
| FIG00626754: hypothetical protein                                                   | Uncharacterized   | Uncharacterized             | 1       | 0       | 0        | 0        | 1       | 0       | 1        | 0        |
| FIG00637864: hypothetical protein                                                   | Uncharacterized   | Uncharacterized             | 0       | 0       | 0        | 0        | 0       | 0       | 1        | 0        |
| FIG00638451: hypothetical protein yiaG putative transcriptional regulator           | Uncharacterized   | Uncharacterized             | 0       | 0       | 0        | 0        | 1       | 0       | 1        | 0        |
| FIG00638667: hypothetical protein                                                   | Uncharacterized   | Uncharacterized             | 1       | 0       | 0        | 0        | 1       | 0       | 1        | 0        |
| FIG00639224: hypothetical protein                                                   | Uncharacterized   | Uncharacterized             | 0       | 0       | 0        | 0        | 0       | 0       | 1        | 0        |
| FIG00641944: hypothetical protein                                                   | Uncharacterized   | Uncharacterized             | 0       | 0       | 0        | 0        | 0       | 0       | 1        | 0        |
| FIG00644304: hypothetical protein                                                   | Uncharacterized   | Uncharacterized             | 0       | 0       | 0        | 1        | 0       | 0       | 0        | 0        |
| FIG00731334: hypothetical protein                                                   | Uncharacterized   | Uncharacterized             | 0       | 0       | 0        | 0        | 0       | 0       | 1        | 0        |
| FIG00731341: hypothetical protein                                                   | Uncharacterized   | Uncharacterized             | 0       | 0       | 0        | 0        | 0       | 1       | 1        | 0        |
| FIG00731353: hypothetical protein                                                   | Uncharacterized   | Uncharacterized             | 0       | 0       | 0        | 0        | 0       | 0       | 1        | 0        |
| FIG00731379: hypothetical protein                                                   | Uncharacterized   | Uncharacterized             | 0       | 0       | 0        | 0        | 0       | 0       | 1        | 0        |
| FIG00731387: hypothetical protein-YgaU                                              | Uncharacterized   | Uncharacterized             | 0       | 0       | 0        | 0        | 1       | 0       | 1        | 0        |
| FIG00731389: hypothetical protein                                                   | Uncharacterized   | Uncharacterized             | 0       | 0       | 0        | 0        | 0       | 0       | 0        | 1        |
| FIG00731406: hypothetical protein                                                   | Uncharacterized   | Uncharacterized             | 0       | 0       | 0        | 0        | 0       | 0       | 1        | 0        |
| FIG00731415: hypothetical protein                                                   | Uncharacterized   | Uncharacterized             | 0       | 0       | 1        | 0        | 0       | 0       | 1        | 0        |
| FIG00731458: hypothetical protein                                                   | Uncharacterized   | Uncharacterized             | 0       | 0       | 0        | 0        | 0       | 0       | 0        | 1        |
| FIG00731504: hypothetical protein                                                   | Uncharacterized   | Uncharacterized             | 0       | 0       | 0        | 0        | 1       | 0       | 0        | 0        |
| FIG00731529: hypothetical protein                                                   | Uncharacterized   | Uncharacterized             | 0       | 0       | 0        | 0        | 0       | 1       | 0        | 0        |

FIG00731538: hypothetical protein  
FIG00731566: hypothetical protein  
FIG00731571: hypothetical protein  
FIG00731668: hypothetical protein  
FIG00731698: hypothetical protein  
FIG00731703: hypothetical protein  
FIG00731712: hypothetical protein  
FIG00731716: hypothetical protein  
FIG00731791: hypothetical protein  
FIG00731810: hypothetical protein  
FIG00731846: hypothetical protein  
FIG00731878: hypothetical protein  
FIG00731881: hypothetical protein  
FIG00731925: hypothetical protein-Two-co  
FIG00731973: hypothetical protein  
FIG00732023: hypothetical protein  
FIG00732033: hypothetical protein  
FIG00732054: hypothetical protein  
FIG00732056: hypothetical protein  
FIG00732091: hypothetical protein  
FIG00732127: hypothetical protein  
FIG00732133: hypothetical protein  
FIG00732166: hypothetical protein  
FIG00732195: hypothetical protein  
FIG00732247: hypothetical protein  
FIG00732255: hypothetical protein  
FIG00732265: hypothetical protein  
FIG00732296: hypothetical protein  
FIG00732313: hypothetical protein  
FIG00732337: hypothetical protein  
FIG00732338: hypothetical protein - YgaM  
FIG00732344: hypothetical protein  
FIG00732364: hypothetical protein  
FIG00732374: hypothetical protein  
FIG00732415: hypothetical protein  
FIG00732462: hypothetical protein  
FIG00732463: hypothetical protein  
FIG00732473: hypothetical protein  
FIG00732486: hypothetical protein  
FIG00732487: hypothetical protein  
FIG00732545: hypothetical protein  
FIG00732562: hypothetical protein  
FIG00732604: hypothetical protein  
FIG00732653: hypothetical protein  
FIG00732736: hypothetical protein  
FIG00732740: hypothetical protein  
FIG00732763: hypothetical protein  
FIG00732790: hypothetical protein  
FIG00732796: hypothetical protein  
FIG00732835: hypothetical protein

[illegible][illegible][illegible]

|                                                                          | SEED CATEGORY   | SEED SUBCATEGORY          | BR7-2h- | BR7-2h- | BR21-2h- | BR21-2h- | BR7-8h- | BR7-8h- | BR21-8h- | BR21-8h- |
|--------------------------------------------------------------------------|-----------------|---------------------------|---------|---------|----------|----------|---------|---------|----------|----------|
|                                                                          |                 |                           | up      | down    | up       | down     | up      | down    | up       | down     |
| Chromosomal Genes (Plasmid-borne genes listed separately below)          |                 |                           |         |         |          |          |         |         |          |          |
| FIG00732856: hypothetical protein                                        | Uncharacterized | Uncharacterized           | 0       | 0       | 0        | 0        | 0       | 1       | 0        | 0        |
| FIG00732920: hypothetical protein                                        | Uncharacterized | Uncharacterized           | 0       | 0       | 0        | 0        | 1       | 0       | 1        | 0        |
| FIG00732925: hypothetical protein                                        | Uncharacterized | Uncharacterized           | 0       | 0       | 0        | 0        | 0       | 0       | 0        | 1        |
| FIG00732927: hypothetical protein                                        | Uncharacterized | Uncharacterized           | 0       | 0       | 0        | 0        | 0       | 0       | 1        | 0        |
| FIG00809136: hypothetical protein                                        | Uncharacterized | Uncharacterized           | 0       | 0       | 0        | 0        | 0       | 0       | 1        | 0        |
| FIG00919961: hypothetical protein                                        | Uncharacterized | Uncharacterized           | 0       | 0       | 0        | 0        | 1       | 0       | 1        | 0        |
| FIG00921183: possible ligase                                             | Uncharacterized | Uncharacterized           | 0       | 0       | 0        | 0        | 0       | 0       | 0        | 1        |
| FIG00922551: hypothetical protein                                        | Uncharacterized | Uncharacterized           | 0       | 0       | 0        | 0        | 0       | 0       | 0        | 1        |
| FIG01199806: hypothetical protein                                        | Uncharacterized | Uncharacterized           | 0       | 0       | 0        | 0        | 0       | 0       | 1        | 0        |
| FIG01200701: possible membrane protein                                   | Uncharacterized | Uncharacterized           | 0       | 0       | 0        | 0        | 1       | 0       | 1        | 0        |
| FIG01219827: hypothetical protein - ygaC                                 | Uncharacterized | Uncharacterized           | 0       | 0       | 0        | 0        | 1       | 0       | 1        | 0        |
| FIG01220476: hypothetical protein                                        | Uncharacterized | Uncharacterized           | 0       | 0       | 0        | 0        | 1       | 0       | 1        | 0        |
| FIG137360: hypothetical protein                                          | Uncharacterized | Uncharacterized           | 0       | 0       | 0        | 0        | 0       | 0       | 1        | 0        |
| FIG139552: Putative protease                                             | Uncharacterized | Uncharacterized           | 0       | 0       | 0        | 0        | 0       | 0       | 0        | 1        |
| FIG139928: Putative protease                                             | Uncharacterized | Uncharacterized           | 0       | 0       | 0        | 0        | 0       | 0       | 0        | 1        |
| FxsA protein                                                             | Uncharacterized | Uncharacterized           | 0       | 0       | 0        | 0        | 0       | 0       | 0        | 1        |
| Glycosaminoglycan attachment site                                        | Uncharacterized | uncharacterized           | 0       | 0       | 0        | 0        | 1       | 0       | 0        | 0        |
| Hypothetical protein COG3496                                             | Uncharacterized | Uncharacterized           | 0       | 0       | 0        | 0        | 0       | 0       | 0        | 1        |
| Hypothetical protein ycgF                                                | Uncharacterized | uncharacterized           | 0       | 0       | 0        | 0        | 1       | 0       | 1        | 0        |
| Hypothetical protein YqcC (clustered with tRNA pseudouridine synthase C) | Uncharacterized | Uncharacterized           | 0       | 0       | 0        | 0        | 0       | 1       | 0        | 1        |
| Hypothetical Zinc-finger containing protein                              | Uncharacterized | Uncharacterized           | 0       | 0       | 0        | 0        | 0       | 0       | 1        | 0        |
| Inner membrane protein YbhQ                                              | Uncharacterized | uncharacterized           | 0       | 0       | 0        | 0        | 1       | 0       | 1        | 0        |
| Inner membrane protein YccF                                              | Uncharacterized | Uncharacterized           | 0       | 0       | 0        | 0        | 0       | 0       | 0        | 1        |
| Inner membrane protein YfiN                                              | Uncharacterized | Uncharacterized           | 0       | 0       | 0        | 0        | 0       | 0       | 0        | 1        |
| Inner membrane protein YphA                                              | Uncharacterized | Uncharacterized           | 0       | 0       | 0        | 0        | 0       | 0       | 1        | 0        |
| Inner membrane protein YqjE                                              | Uncharacterized | Uncharacterized           | 0       | 0       | 0        | 0        | 0       | 0       | 1        | 0        |
| Inner membrane protein YqjK                                              | Uncharacterized | Uncharacterized           | 0       | 0       | 0        | 0        | 1       | 0       | 1        | 0        |
| LysR-family transcriptional regulator                                    | Uncharacterized | uncharacterized regulator | 0       | 0       | 0        | 0        | 0       | 0       | 0        | 1        |
| membrane protein, putative                                               | Uncharacterized | Uncharacterized           | 0       | 0       | 0        | 0        | 0       | 0       | 1        | 0        |
| MG(2+) CHELATASE FAMILY PROTEIN / ComM-related protein                   | Uncharacterized | uncharacterized           | 0       | 0       | 0        | 0        | 1       | 0       | 1        | 0        |
| Possible membrane transport protein                                      | Uncharacterized | Uncharacterized           | 0       | 0       | 0        | 0        | 0       | 0       | 1        | 0        |
| Probable 3-phenylpropionic acid transporter                              | Uncharacterized | uncharacterized           | 0       | 0       | 0        | 0        | 0       | 1       | 0        | 1        |
| Probable ABC transporter, ATP-binding subunit                            | Uncharacterized | Uncharacterized           | 1       | 0       | 0        | 0        | 1       | 0       | 1        | 0        |
| probable exported protein YPO0130                                        | Uncharacterized | uncharacterized           | 0       | 0       | 0        | 0        | 1       | 0       | 1        | 0        |
| probable exported protein YPO4040                                        | Uncharacterized | Uncharacterized           | 0       | 0       | 0        | 1        | 0       | 0       | 0        | 0        |
| probable extracellular solute-binding protein                            | Uncharacterized | uncharacterized           | 0       | 0       | 0        | 0        | 0       | 0       | 1        | 0        |
| probable lipoprotein- ybjP                                               | Uncharacterized | Uncharacterized           | 0       | 0       | 0        | 0        | 0       | 0       | 1        | 0        |
| probable membrane protein yjel                                           | Uncharacterized | Uncharacterized           | 0       | 0       | 0        | 0        | 1       | 0       | 0        | 0        |
| probable regulatory protein STY1856                                      | Uncharacterized | Uncharacterized           | 0       | 0       | 0        | 0        | 0       | 0       | 1        | 0        |
| Probable secreted protein                                                | Uncharacterized | uncharacterized           | 0       | 0       | 0        | 0        | 1       | 0       | 1        | 0        |
| protein                                                                  | Uncharacterized | uncharacterized           | 0       | 0       | 0        | 0        | 1       | 0       | 1        | 0        |
| Protein YaiA                                                             | Uncharacterized | Uncharacterized           | 0       | 0       | 0        | 0        | 0       | 0       | 1        | 0        |
| Protein YciE                                                             | Uncharacterized | Uncharacterized           | 0       | 0       | 0        | 0        | 1       | 0       | 1        | 0        |
| Protein YciF                                                             | Uncharacterized | Uncharacterized           | 0       | 0       | 0        | 0        | 0       | 0       | 1        | 0        |
| Protein yhjK                                                             | Uncharacterized | Uncharacterized           | 0       | 0       | 0        | 0        | 0       | 0       | 0        | 1        |
| putative cytoplasmic protein                                             | Uncharacterized | Uncharacterized           | 0       | 0       | 0        | 0        | 0       | 0       | 1        | 0        |
| Putative ECA polymerase (may be wzy, regulator of mucoid capsule)        | Uncharacterized | Uncharacterized           | 0       | 0       | 0        | 0        | 0       | 0       | 0        | 1        |
| Putative esterase                                                        | Uncharacterized | Uncharacterized           | 0       | 0       | 0        | 0        | 1       | 0       | 1        | 0        |
| Putative exported protein                                                | Uncharacterized | Uncharacterized           | 0       | 0       | 0        | 0        | 0       | 0       | 0        | 1        |
| Putative exported protein precursor                                      | Uncharacterized | Uncharacterized           | 0       | 0       | 0        | 0        | 0       | 0       | 1        | 0        |

|                                                                              | SEED CATEGORY                  | SEED SUBCATEGORY             | BR7-2h- | BR7-2h- | BR21-2h- | BR21-2h- | BR7-8h- | BR7-8h- | BR21-8h- | BR21-8h- |
|------------------------------------------------------------------------------|--------------------------------|------------------------------|---------|---------|----------|----------|---------|---------|----------|----------|
|                                                                              |                                |                              | up      | down    | up       | down     | up      | down    | up       | down     |
| Chromosomal Genes (Plasmid-borne genes listed separately below)              |                                |                              |         |         |          |          |         |         |          |          |
| putative fimbrial-like protein                                               | Uncharacterized                | Uncharacterized              | 0       | 0       | 0        | 0        | 0       | 0       | 0        | 1        |
| putative glutamine amidotransferase class-I                                  | Uncharacterized                | Uncharacterized              | 0       | 0       | 0        | 0        | 0       | 0       | 1        | 0        |
| Putative glycoporin                                                          | Uncharacterized                | Uncharacterized              | 0       | 0       | 0        | 0        | 0       | 0       | 1        | 0        |
| Putative glycoprotein/receptor                                               | Uncharacterized                | Uncharacterized              | 0       | 0       | 0        | 0        | 0       | 0       | 0        | 1        |
| putative inner membrane protein                                              | Uncharacterized                | Uncharacterized              | 0       | 0       | 0        | 0        | 0       | 0       | 1        | 0        |
| putative integral membrane transport protein                                 | Uncharacterized                | Uncharacterized              | 1       | 0       | 0        | 0        | 1       | 0       | 1        | 0        |
| putative lipoprotein                                                         | Uncharacterized                | Uncharacterized              | 0       | 0       | 0        | 0        | 0       | 0       | 1        | 0        |
| Putative membrane protein YeiH                                               | Uncharacterized                | uncharacterized              | 0       | 0       | 0        | 0        | 0       | 1       | 0        | 1        |
| Putative protease                                                            | Uncharacterized                | Uncharacterized              | 0       | 0       | 0        | 0        | 0       | 1       | 0        | 0        |
| Putative regulator                                                           | Uncharacterized                | uncharacterized regulatory   | 0       | 0       | 0        | 0        | 1       | 0       | 1        | 0        |
| putative transport                                                           | Uncharacterized                | Uncharacterized              | 0       | 0       | 0        | 0        | 0       | 0       | 1        | 0        |
| regulatory protein, LuxR                                                     | Uncharacterized                | uncharacterized regulatory   | 0       | 0       | 0        | 0        | 0       | 0       | 1        | 0        |
| Response regulator protein Z5684                                             | Uncharacterized                | uncharacterized              | 0       | 0       | 0        | 0        | 1       | 0       | 0        | 0        |
| Transcriptional regulator PobR, AraC family                                  | Uncharacterized                | Uncharacterized              | 1       | 0       | 0        | 0        | 1       | 0       | 1        | 0        |
| Uncharacterised protein family UPF0157 (COG2320)                             | Uncharacterized                | Uncharacterized              | 0       | 0       | 0        | 0        | 0       | 0       | 1        | 0        |
| Uncharacterized lipoprotein yaeF precursor                                   | Uncharacterized                | Uncharacterized              | 0       | 0       | 0        | 0        | 0       | 1       | 0        | 1        |
| Uncharacterized lipoprotein YsaB precursor                                   | Uncharacterized                | Uncharacterized              | 0       | 0       | 0        | 0        | 0       | 0       | 1        | 0        |
| Uncharacterized membrane protein YqjD                                        | Uncharacterized                | uncharacterized              | 0       | 0       | 0        | 0        | 1       | 0       | 1        | 0        |
| Uncharacterized oxidoreductase ydgJ (EC 1.-.-.)                              | Uncharacterized                | Uncharacterized              | 0       | 0       | 0        | 0        | 0       | 0       | 1        | 0        |
| Uncharacterized PLP-dependent aminotransferase YfdZ                          | Uncharacterized                | Uncharacterized              | 0       | 0       | 0        | 0        | 1       | 0       | 0        | 0        |
| Uncharacterized protein conserved in bacteria                                | Uncharacterized                | Uncharacterized              | 0       | 0       | 0        | 0        | 0       | 0       | 1        | 0        |
| Uncharacterized protein ybfE                                                 | Uncharacterized                | uncharacterized              | 0       | 0       | 0        | 0        | 0       | 1       | 0        | 0        |
| Uncharacterized protein YhaL                                                 | Uncharacterized                | Uncharacterized              | 0       | 0       | 0        | 0        | 0       | 0       | 0        | 1        |
| UPF0098 protein ybhB                                                         | Uncharacterized                | Uncharacterized              | 0       | 0       | 0        | 0        | 0       | 0       | 1        | 0        |
| YbjC protein, clustered with oxygen-insensitive NADPH nitroreductase         | Uncharacterized                | uncharacterized              | 0       | 0       | 0        | 0        | 0       | 1       | 0        | 0        |
| Albicidin resistance protein                                                 | Virulence, Disease and Defense | Resistance to antibiotics ar | 0       | 0       | 0        | 0        | 0       | 0       | 1        | 0        |
| Antibiotic biosynthesis monooxygenase                                        | Virulence, Disease and Defense | Resistance to antibiotics ar | 0       | 0       | 0        | 0        | 0       | 0       | 1        | 0        |
| Arsenic efflux pump protein                                                  | Virulence, Disease and Defense | Resistance to antibiotics ar | 0       | 0       | 0        | 0        | 0       | 0       | 1        | 0        |
| Gifsy-2 prophage protein                                                     | Virulence, Disease and Defense | Resistance to antibiotics ar | 0       | 0       | 0        | 0        | 1       | 0       | 1        | 0        |
| HTH-type transcriptional regulator YidP                                      | Virulence, Disease and Defense | Adhesion                     | 0       | 0       | 0        | 0        | 0       | 0       | 0        | 1        |
| Metal-dependent hydrolases of the beta-lactamase superfamily III             | Virulence, Disease and Defense | Resistance to antibiotics ar | 0       | 0       | 0        | 0        | 0       | 0       | 1        | 0        |
| Methyl viologen resistance protein smvA                                      | Virulence, Disease and Defense | Resistance to antibiotics ar | 0       | 0       | 0        | 1        | 0       | 0       | 1        | 0        |
| Multidrug and toxin extrusion (MATE) family efflux pump YdHc/NorM            | Virulence, Disease and Defense | Resistance to antibiotics ar | 0       | 0       | 0        | 0        | 0       | 0       | 1        | 0        |
| Multidrug-efflux transporter, major facilitator superfamily (MFS) (TC 2.A.1) | Virulence, Disease and Defense | Resistance to antibiotics ar | 0       | 0       | 0        | 0        | 0       | 0       | 0        | 1        |
| Outer membrane component of tripartite multidrug resistance system           | Virulence, Disease and Defense | Resistance to antibiotics ar | 0       | 0       | 0        | 0        | 0       | 0       | 0        | 1        |
| Probable Co/Zn/Cd efflux system membrane fusion protein                      | Virulence, Disease and Defense | Resistance to antibiotics ar | 0       | 0       | 0        | 0        | 0       | 1       | 0        | 0        |
| Putative resistance protein                                                  | Virulence, Disease and Defense | Resistance to antibiotics ar | 0       | 0       | 0        | 0        | 0       | 1       | 0        | 1        |
| Quaternary ammonium compound-resistance protein SugE                         | Virulence, Disease and Defense | Resistance to antibiotics ar | 0       | 0       | 0        | 0        | 0       | 0       | 1        | 0        |
| RND efflux system, membrane fusion protein CmeA (oqxA)                       | Virulence, Disease and Defense | Resistance to antibiotics ar | 0       | 0       | 0        | 0        | 0       | 1       | 0        | 0        |
| RND multidrug efflux transporter; Acriflavin resistance protein; oqxB        | Virulence, Disease and Defense | Resistance to antibiotics ar | 0       | 0       | 0        | 0        | 0       | 1       | 0        | 1        |
| SbmA protein                                                                 | Virulence, Disease and Defense | Resistance to antibiotics ar | 0       | 0       | 0        | 0        | 0       | 0       | 0        | 1        |
| Sensor protein of zinc sigma-54-dependent two-component system               | Virulence, Disease and Defense | Resistance to antibiotics ar | 0       | 0       | 0        | 0        | 0       | 0       | 0        | 1        |
| Spermidine export protein MdtI                                               | Virulence, Disease and Defense | Resistance to antibiotics ar | 0       | 0       | 0        | 1        | 0       | 0       | 0        | 0        |
| Spermidine export protein MdtJ                                               | Virulence, Disease and Defense | Resistance to antibiotics ar | 0       | 0       | 0        | 1        | 0       | 0       | 0        | 0        |
| Uncharacterized protein YidR                                                 | Virulence, Disease and Defense | Adhesion                     | 0       | 0       | 0        | 0        | 0       | 0       | 0        | 1        |
| virulence protein                                                            | Virulence, Disease and Defense | Virulence - no subcategory   | 0       | 0       | 1        | 0        | 0       | 0       | 0        | 0        |
| Zinc ABC transporter, inner membrane permease protein ZnuB                   | Virulence, Disease and Defense | Resistance to antibiotics ar | 0       | 0       | 0        | 0        | 0       | 1       | 0        | 1        |
| Zinc transport protein ZntB                                                  | Virulence, Disease and Defense | Resistance to antibiotics ar | 0       | 0       | 0        | 0        | 1       | 0       | 1        | 0        |
| Zinc transporter ZitB                                                        | Virulence, Disease and Defense | Resistance to antibiotics ar | 0       | 0       | 0        | 0        | 0       | 0       | 1        | 0        |
| unknown gene - what happened in sort?                                        |                                |                              | 0       | 0       | 0        | 0        | 0       | 0       | 1        | 0        |

| Chromosomal Genes (Plasmid-borne genes listed separately below)                                              | SEED CATEGORY | SEED SUBCATEGORY | BR7-2h- | BR7-2h- | BR21-2h- | BR21-2h- | BR7-8h- | BR7-8h- | BR21-8h- | BR21-8h- |
|--------------------------------------------------------------------------------------------------------------|---------------|------------------|---------|---------|----------|----------|---------|---------|----------|----------|
|                                                                                                              |               |                  | up      | down    | up       | down     | up      | down    | up       | down     |
| Total Differentially expressed chromosomal genes                                                             |               |                  | 87      | 40      | 93       | 33       | 300     | 159     | 662      | 347      |
|                                                                                                              |               |                  | 127     |         | 126      |          | 459     |         | 1009     |          |
| Plasmid-borne DE genes                                                                                       | Plasmid       |                  | BR7-2h- | BR7-2h- | BR21-2h- | BR21-2h- | BR7-8h- | BR7-8h- | BR21-8h- | BR21-8h- |
| Gifsy-2 prophage protein                                                                                     | pQIL/N        |                  | up      | down    | up       | down     | up      | down    | up       | down     |
| Dihydrofolate reductase (EC 1.5.1.3)                                                                         | IncN          |                  |         | 1       |          |          |         |         |          |          |
| Error-prone repair protein UmuD                                                                              | IncN          |                  |         |         | 1        |          |         |         | 1        |          |
| Error-prone, lesion bypass DNA polymerase V (UmuC)                                                           | IncN          |                  |         |         | 1        |          |         |         | 1        |          |
| ATPase provides energy for both assembly of type IV secretion complex and secretion of T-DNA complex (VirB4) | IncN          |                  |         |         |          |          |         |         | 1        |          |
| Chloramphenicol acetyltransferase (EC 2.3.1.28)                                                              | IncN          |                  |         |         |          |          |         |         |          | 1        |
| DNA-cytosine methyltransferase (EC 2.1.1.37)                                                                 | IncN          |                  |         |         |          |          |         |         |          | 1        |
| Forms the bulk of type IV secretion complex that spans outer membrane and periplasm                          | IncN          |                  |         |         |          |          |         |         | 1        |          |
| Inner membrane protein forms channel for type IV secretion of T-DNA complex, VirB1                           | IncN          |                  |         |         |          |          |         |         | 1        |          |
| Minor pilin of type IV secretion complex, VirB5                                                              | IncN          |                  |         |         |          |          |         |         | 1        |          |
| Peptidoglycan hydrolase VirB1, involved in T-DNA transfer                                                    | IncN          |                  |         |         |          |          |         |         | 1        |          |
| TniB NTP-binding protein                                                                                     | IncN          |                  |         |         |          |          |         |         | 1        |          |
| Type I restriction-modification system, DNA-methyltransferase subunit M (EC 2.1.1.3)                         | IncN          |                  |         |         |          |          |         |         |          | 1        |
| Type I restriction-modification system, restriction subunit R (EC 3.1.21.3)                                  | IncN          |                  |         |         |          |          |         |         |          | 1        |
| Type I restriction-modification system, specificity subunit S (EC 3.1.21.3)                                  | IncN          |                  |         |         |          |          |         |         |          | 1        |
| Cation efflux system protein CusC precursor                                                                  | IncF          |                  |         |         |          |          |         |         | 1        |          |
| Fe2+-dicitrate sensor, membrane component                                                                    | IncF          |                  |         |         |          |          |         |         | 1        |          |
| FIG00732614: hypothetical protein                                                                            | IncF          |                  |         |         |          |          |         |         | 1        |          |
| FIG074102: hypothetical protein                                                                              | IncF          |                  |         |         |          |          |         |         | 1        |          |
| Iron(III) dicitrate transmembrane sensor protein FecR                                                        | IncF          |                  |         |         |          |          |         |         | 1        |          |
| Lead, cadmium, zinc and mercury transporting ATPase (EC 3.6.3.3) (EC 3.6.3.5);                               |               |                  |         |         |          |          |         |         |          |          |
| Copper-translocating P-type ATPase (EC 3.6.3.4)                                                              | IncF          |                  |         |         |          |          |         |         | 1        |          |
| PsiA protein                                                                                                 | IncF          |                  |         |         |          |          |         |         | 1        |          |
| Single-stranded DNA-binding protein                                                                          | IncF          |                  |         |         |          |          |         |         | 1        |          |
| Transcriptional repressor of the lac operon                                                                  | IncF          |                  |         |         |          |          |         |         |          | 1        |
| Total Differentially expressed plasmid-borne genes                                                           |               |                  | 0       | 1       | 2        | 1        | 0       | 0       | 16       | 6        |

# Generally Applicable Gene-set Enrichment (GAGE) analysis output

| <b>K. pneumoniae BR7</b>                | stat.mean | set.size | p.up     | p.dn     | p.val    | q.val (< 0.2) |
|-----------------------------------------|-----------|----------|----------|----------|----------|---------------|
| ko00330 Arginine and proline metabolism | 3.161341  | 12       | 3.21E-05 | 0.999968 | 6.42E-05 | 0.000706      |
| ko02010 ABC transporters                | 2.204952  | 36       | 0.001135 | 0.998865 | 0.00227  | 0.012483      |
| ko01100 Metabolic pathways              | 1.412618  | 95       | 0.023452 | 0.976548 | 0.046904 | 0.155349      |
| ko01200 Carbon metabolism               | 1.383861  | 18       | 0.028245 | 0.971755 | 0.056491 | 0.155349      |
| ko02020 Two-component system            | -1.28143  | 28       | 0.962678 | 0.037322 | 0.074645 | 0.164219      |

| ko00330 Arginine and proline metabolism |                      | logFC    |          |
|-----------------------------------------|----------------------|----------|----------|
| all.mapped                              | all.mappec type      | BR7_2h   | BR7_8h   |
| K00137                                  | <b>prp</b> ortholog  | 0        | 1.541642 |
| K00657                                  | <b>speG</b> ortholog | 0        | -1.11859 |
| K00673                                  | <b>astA</b> ortholog | 3.501754 | 4.784275 |
| K00840                                  | <b>astC</b> ortholog | 3.965324 | 5.250075 |
| K01484                                  | NA ortholog          | 3.5502   | 4.249296 |
| K01485                                  | NA ortholog          | 0        | 1.278882 |
| K05526                                  | <b>astE</b> ortholog | 3.409243 | 4.016197 |
| K06447                                  | <b>astD</b> ortholog | 3.721411 | 4.545581 |
| K09251                                  | <b>patA</b> ortholog | 0        | 1.551894 |
| K09470                                  | <b>puuA</b> ortholog | 4.079344 | 5.754031 |
| K09471                                  | <b>puuB</b> ortholog | 2.677286 | 3.58963  |
| K09473                                  | <b>puuD</b> ortholog | 3.843377 | 4.921032 |

| ko02010 ABC transporters |                 | logFC    |          |
|--------------------------|-----------------|----------|----------|
| all.mapped               | all.mappec type | BR7_2h   | BR7_8h   |
| K01999                   | NA ortholog     | 0        | 1.123255 |
| K02010                   | NA ortholog     | 3.571517 | 6.108331 |
| K02011                   | NA ortholog     | 4.163489 | 7.083557 |
| K02013                   | NA ortholog     | 0        | -2.6009  |
| K02015                   | NA ortholog     | 0        | -1.78687 |
| K02016                   | NA ortholog     | 3.588766 | -2.39753 |
| K02045                   | NA ortholog     | -1.3046  | 0        |
| K02064                   | NA ortholog     | 0        | 1.187239 |
| K05776                   | modF ortholog   | -1.82278 | -1.15664 |



|        |             |          |          |          |
|--------|-------------|----------|----------|----------|
| K05813 | <b>ugpB</b> | ortholog | 2.843076 | 4.211995 |
| K05814 | <b>ugpA</b> | ortholog | 3.474596 | 4.651362 |
| K05815 | <b>ugpE</b> | ortholog | 3.775425 | 4.643997 |
| K05816 | <b>ugpC</b> | ortholog | 2.162543 | 2.905471 |
| K05845 | opuC        | ortholog | 0        | 1.620222 |
| K10001 | <b>gltI</b> | ortholog | 2.713762 | 4.291698 |
| K10002 | <b>gltK</b> | ortholog | 1.777406 | 2.832066 |
| K10004 | <b>gltL</b> | ortholog | 1.769924 | 3.23687  |
| K10013 | ABC.ARG.S   | ortholog | 2.337383 | 2.983401 |
| K10017 | <b>hisP</b> | ortholog | 0        | 1.225855 |
| K10017 | <b>hisP</b> | ortholog | 0        | 1.225855 |
| K10108 | malE        | ortholog | 0        | 2.233418 |
| K10110 | malG        | ortholog | 0        | 1.848861 |
| K10111 | malK        | ortholog | 0        | 2.216643 |
| K10111 | malK        | ortholog | 0        | 2.216643 |
| K10111 | malK        | ortholog | 0        | 2.216643 |
| K10111 | malK        | ortholog | 0        | 2.216643 |
| K10439 | rbsB        | ortholog | 0        | 1.383187 |
| K10542 | mglA        | ortholog | 0        | 1.44957  |
| K10543 | xylF        | ortholog | 0        | 2.202788 |
| K10545 | xylG        | ortholog | 0        | 2.545314 |
| K10555 | lsrB        | ortholog | 0        | 1.98796  |
| K10556 | lsrC        | ortholog | 0        | 1.995339 |
| K10557 | lsrD        | ortholog | 0        | 1.875174 |
| K10558 | lsrA        | ortholog | 0        | 2.53526  |
| K11073 | NA          | ortholog | 0        | 1.619942 |
| K15584 | NA          | ortholog | -1.74586 | -1.62718 |
| K15587 | NA          | ortholog | 0        | -1.43573 |
| K17202 | NA          | ortholog | 0        | 2.707032 |
| K17214 | NA          | ortholog | 2.412615 | 3.206202 |
| K17215 | NA          | ortholog | 3.052927 | 3.962222 |

|                              |                 |        |        |
|------------------------------|-----------------|--------|--------|
| ko02020 Two-component system |                 | logFC  | logFC  |
| all.mapped                   | all.mappec type | BR7_2h | BR7_8h |

|        |             |          |          |          |
|--------|-------------|----------|----------|----------|
| K00370 | narG        | ortholog | -3.01301 | -3.93945 |
| K00370 | narG        | ortholog | -3.01301 | -3.93945 |
| K00371 | narH        | ortholog | -2.83566 | -3.73085 |
| K00371 | narH        | ortholog | -2.83566 | -3.73085 |
| K00373 | narJ        | ortholog | 0        | -2.60582 |
| K00373 | narJ        | ortholog | 0        | -2.60582 |
| K01077 | NA          | ortholog | 0        | 1.542812 |
| K01077 | NA          | ortholog | 0        | 1.542812 |
| K01546 | NA          | ortholog | 0        | -2.17518 |
| K01643 | NA          | ortholog | 0        | 1.684622 |
| K01644 | NA          | ortholog | 0        | 2.13491  |
| K01915 | NA          | ortholog | 0        | -1.50586 |
| K07644 | cusS        | ortholog | 0        | -1.33631 |
| K07657 | phoB        | ortholog | 0        | 1.028626 |
| K07667 | kdpE        | ortholog | 0        | -1.0523  |
| K07673 | narX        | ortholog | -1.87461 | -2.9336  |
| K07675 | uhpB        | ortholog | 0        | -1.3759  |
| K07679 | evgS        | ortholog | 0        | -1.47879 |
| K07684 | narL        | ortholog | -2.06362 | -2.69339 |
| K07690 | evgA        | ortholog | 0        | -1.92905 |
| K07700 | dpiB        | ortholog | 0        | 1.496685 |
| K07702 | dpiA        | ortholog | 0        | 2.125148 |
| K07708 | glnL        | ortholog | 0        | -1.21303 |
| K07783 | uhpC        | ortholog | 0        | -1.32807 |
| K07792 | dcuB        | ortholog | 2.352333 | 0        |
| K08348 | fdnG        | ortholog | 0        | -3.11328 |
| K08350 | fdnI        | ortholog | 0        | -3.4788  |
| K10001 | <b>gltI</b> | ortholog | 2.713762 | 4.291698 |
| K10002 | <b>gltK</b> | ortholog | 1.777406 | 2.832066 |
| K10004 | <b>gltL</b> | ortholog | 1.769924 | 3.23687  |
| K11103 | NA          | ortholog | 0        | 3.144914 |
| K11103 | NA          | ortholog | 0        | 3.144914 |
| K19611 | NA          | ortholog | 0        | -3.40718 |

| <b>K. pneumoniae BR21</b>                       | stat.mean | set.size | p.up     | p.dn     | p.val    | q.val (< 0.2) |
|-------------------------------------------------|-----------|----------|----------|----------|----------|---------------|
| ko00330 Arginine and proline metabolism         | 2.77726   | 10       | 0.00116  | 0.99884  | 0.00232  | 0.025516      |
| ko02010 ABC transporters                        | 1.887481  | 72       | 0.004374 | 0.995626 | 0.008749 | 0.064156      |
| ko00020 Citrate cycle (TCA cycle)               | 1.630363  | 17       | 0.012855 | 0.987145 | 0.025709 | 0.099563      |
| ko00720 Carbon fixation pathways in prokaryotes | 1.626157  | 14       | 0.013577 | 0.986423 | 0.027154 | 0.099563      |
| ko01220 Degradation of aromatic compounds       | 1.53334   | 11       | 0.029983 | 0.970017 | 0.059967 | 0.164909      |
| ko01130 Biosynthesis of antibiotics             | 1.503717  | 50       | 0.017729 | 0.982271 | 0.035458 | 0.11144       |
| ko01100 Metabolic pathways                      | 1.268082  | 173      | 0.036784 | 0.963216 | 0.073568 | 0.179832      |
| ko02020 Two-component system                    | -1.65247  | 35       | 0.989187 | 0.010813 | 0.021627 | 0.099563      |
| ko03010 Ribosome                                | -3.08061  | 35       | 0.999905 | 9.47E-05 | 0.000189 | 0.004167      |

| ko00330 Arginine and proline metabolism |            |          | logFC    | logFC    |
|-----------------------------------------|------------|----------|----------|----------|
| all.mapped                              | all.mappec | type     | BR21_2h  | BR21_8h  |
| K00137                                  | prp        | ortholog | 0        | 2.41256  |
| K00673                                  | astA       | ortholog | 1.497134 | 5.387309 |
| K00840                                  | astC       | ortholog | 1.624573 | 5.891437 |
| K01484                                  | NA         | ortholog | 0        | 4.163549 |
| K05526                                  | astE       | ortholog | 0        | 4.547433 |
| K06447                                  | astD       | ortholog | 0        | 4.99648  |
| K09251                                  | patA       | ortholog | 0        | 3.777509 |
| K09470                                  | puuA       | ortholog | 0        | 4.850527 |
| K09471                                  | puuB       | ortholog | 0        | 4.694586 |
| K09473                                  | puuD       | ortholog | 0        | 4.153217 |

| ko02010 ABC transporters |            |          | logFC    | logFC    |
|--------------------------|------------|----------|----------|----------|
| all.mapped               | all.mappec | type     | BR21_2h  | BR21_8h  |
| K02000                   | NA         | ortholog | 0        | 1.137761 |
| K02002                   | NA         | ortholog | 0        | 1.447073 |
| K02010                   | NA         | ortholog | 0        | 4.727739 |
| K02011                   | NA         | ortholog | 0        | 4.43488  |
| K02012                   | NA         | ortholog | 0        | 1.68602  |
| K02013                   | NA         | ortholog | 2.734153 | 2.300644 |
| K02015                   | NA         | ortholog | 2.054811 | 2.906352 |

|        |                  |          |          |          |
|--------|------------------|----------|----------|----------|
| K02016 | NA               | ortholog | 0        | 1.937694 |
| K02020 | NA               | ortholog | -1.75349 | 0        |
| K02041 | NA               | ortholog | 0        | 1.758778 |
| K02044 | NA               | ortholog | 0        | 2.137632 |
| K02064 | NA               | ortholog | 0        | 1.155641 |
| K05776 | modF             | ortholog | -1.46995 | -1.78261 |
| K05813 | <b>ugpB</b>      | ortholog | 0        | 4.77258  |
| K05814 | <b>ugpA</b>      | ortholog | 0        | 4.936252 |
| K05815 | <b>ugpE</b>      | ortholog | 0        | 3.400297 |
| K05816 | <b>ugpC</b>      | ortholog | 0        | 3.713979 |
| K05845 | opuC             | ortholog | 0        | 2.903994 |
| K05846 | opuBD            | ortholog | 0        | 2.654145 |
| K05847 | opuA             | ortholog | 0        | 2.629667 |
| K06074 | ABC.VB12.        | ortholog | 0        | 0.887823 |
| K06858 | ABC.VB12.        | ortholog | 0        | -1.0694  |
| K09812 | ftsE             | ortholog | 0        | -1.06225 |
| K10000 | artP             | ortholog | 0        | 1.204521 |
| K10001 | <b>gltI</b>      | ortholog | 0        | 4.905064 |
| K10002 | <b>gltK</b>      | ortholog | 0        | 3.193442 |
| K10004 | <b>gltL</b>      | ortholog | 0        | 3.177999 |
| K10013 | <b>ABC.ARG.5</b> | ortholog | 0        | 3.087819 |
| K10036 | glnH             | ortholog | 0        | 1.71233  |
| K10108 | malE             | ortholog | 0        | -2.85976 |
| K10109 | malF             | ortholog | 0        | -2.71372 |
| K10110 | malG             | ortholog | 0        | -2.819   |
| K10111 | malK             | ortholog | 0        | -3.17516 |
| K10111 | malK             | ortholog | 0        | -3.17516 |
| K10111 | malK             | ortholog | 0        | -3.17516 |
| K10111 | malK             | ortholog | 0        | -3.17516 |
| K10192 | togB             | ortholog | 0        | 1.832778 |
| K10194 | togN             | ortholog | 0        | 1.508102 |
| K10195 | togA             | ortholog | 0        | 1.640071 |
| K10439 | rbsB             | ortholog | 1.777289 | 2.392902 |
| K10537 | araF             | ortholog | 0        | 2.066787 |

|        |      |          |          |          |
|--------|------|----------|----------|----------|
| K10538 | araH | ortholog | 0        | 1.959347 |
| K10539 | araG | ortholog | 0        | 2.288733 |
| K10540 | mglB | ortholog | 0        | 4.988405 |
| K10541 | mglC | ortholog | 1.882046 | 4.877401 |
| K10542 | mglA | ortholog | 0        | 4.792101 |
| K10543 | xylF | ortholog | 0        | 3.112318 |
| K10545 | xylG | ortholog | 0        | 2.502781 |
| K10555 | lsrB | ortholog | 0        | 4.873514 |
| K10556 | lsrC | ortholog | 0        | 4.263863 |
| K10557 | lsrD | ortholog | 0        | 4.728144 |
| K10558 | lsrA | ortholog | 0        | 4.337619 |
| K10824 | NA   | ortholog | 0        | -1.93188 |
| K11073 | NA   | ortholog | 0        | 2.188393 |
| K11075 | NA   | ortholog | 0        | 1.588352 |
| K11076 | NA   | ortholog | 0        | 1.527297 |
| K11604 | NA   | ortholog | 0        | 3.227928 |
| K11605 | NA   | ortholog | 0        | 2.795945 |
| K11606 | NA   | ortholog | 0        | 2.851927 |
| K11607 | NA   | ortholog | 2.078981 | 3.318698 |
| K12368 | NA   | ortholog | 0        | 2.018915 |
| K12369 | NA   | ortholog | 0        | 3.362986 |
| K12370 | NA   | ortholog | 0        | 1.391521 |
| K12371 | NA   | ortholog | 0        | 1.343125 |
| K12372 | NA   | ortholog | 0        | 1.849447 |
| K13890 | NA   | ortholog | 0        | 1.510861 |
| K15580 | NA   | ortholog | 0        | 1.774647 |
| K15584 | NA   | ortholog | 0        | -1.98358 |
| K15585 | NA   | ortholog | 0        | -1.90451 |
| K15586 | NA   | ortholog | 0        | -2.44308 |
| K15598 | NA   | ortholog | 0        | 2.371422 |
| K15599 | NA   | ortholog | 0        | 3.045289 |
| K17213 | NA   | ortholog | 0        | 4.360152 |
| K17214 | NA   | ortholog | 0        | 3.005826 |
| K17215 | NA   | ortholog | 0        | 4.480829 |

| ko00020 Citrate cycle (TCA cycle) |                           |  | logFC    | logFC    |
|-----------------------------------|---------------------------|--|----------|----------|
| all.mapped                        | all.mappec type           |  | BR21_2h  | BR21_8h  |
| K00024                            | mdh ortholog              |  | 0        | 3.784824 |
| K00116                            | <b>mgo</b> ortholog       |  | 0        | 2.648283 |
| K00163                            | aceE ortholog             |  | 0        | -1.95903 |
| K00163                            | aceE ortholog             |  | 0        | -1.95903 |
| K00164                            | <b>OGDH</b> ortholog      |  | 0        | 1.93609  |
| K00164                            | <b>OGDH</b> ortholog      |  | 0        | 1.93609  |
| K00241,K00242                     | <b>sdhC,sdhD</b> ortholog |  | 0        | 4.652144 |
| K00241,K00242,K00244,K00245       | <b>sdhC,sdhD</b> ortholog |  | 4.957782 | 10.99067 |
| K00627                            | DLAT ortholog             |  | 0        | -2.02198 |
| K00658                            | DLST ortholog             |  | 0        | 1.850095 |
| K01610                            | NA ortholog               |  | 0        | 3.582135 |
| K01647                            | NA ortholog               |  | 0        | 2.555326 |
| K01676,K01679                     | NA,NA ortholog            |  | 3.674221 | 7.217046 |
| K01681                            | NA ortholog               |  | 0        | 2.174151 |
| K01681                            | NA ortholog               |  | 0        | 2.174151 |
| K01902,K01903                     | NA,NA ortholog            |  | 1.510958 | 3.698619 |

| ko00720 Carbon fixation pathways in prokaryotes |                           |  | logFC    | logFC    |
|-------------------------------------------------|---------------------------|--|----------|----------|
| all.mapped                                      | all.mappec type           |  | BR21_2h  | BR21_8h  |
| K00024                                          | <b>mdh</b> ortholog       |  | 0        | 3.784824 |
| K00241,K00242                                   | <b>sdhC,sdhD</b> ortholog |  | 0        | 4.652144 |
| K00241,K00242,K00244,K00245                     | <b>sdhC,sdhD</b> ortholog |  | 4.957782 | 10.99067 |
| K01007                                          | NA ortholog               |  | 0        | 2.333941 |
| K01595                                          | NA ortholog               |  | 0        | -1.32565 |
| K01676,K01679                                   | NA,NA ortholog            |  | 3.674221 | 7.217046 |
| K01681                                          | NA ortholog               |  | 0        | 2.174151 |
| K01681                                          | NA ortholog               |  | 0        | 2.174151 |
| K01895                                          | NA ortholog               |  | 0        | 5.179662 |
| K01902,K01903                                   | NA,NA ortholog            |  | 1.510958 | 3.698619 |
| K13788                                          | NA ortholog               |  | 0        | -1.92215 |

| ko02020 Two-component system |           |          | logFC    | logFC    |
|------------------------------|-----------|----------|----------|----------|
| all.mapped                   | all.mappe | type     | BR21_2h  | BR21_8h  |
| K00244                       | frdA      | ortholog | 4.957782 | 5.218396 |
| K00245                       | frdB      | ortholog | 0        | 1.120126 |
| K00370                       | narG      | ortholog | 0        | -3.83767 |
| K00370                       | narG      | ortholog | 0        | -3.83767 |
| K00371                       | narH      | ortholog | -3.0195  | -3.77185 |
| K00371                       | narH      | ortholog | -3.0195  | -3.77185 |
| K00373                       | narJ      | ortholog | -4.17323 | -3.23095 |
| K00373                       | narJ      | ortholog | -4.17323 | -3.23095 |
| K00374                       | narI      | ortholog | -4.72475 | -3.20749 |
| K00374                       | narI      | ortholog | -4.72475 | -3.20749 |
| K00990                       | NA        | ortholog | 0        | -1.19319 |
| K01077                       | NA        | ortholog | 0        | 1.823924 |
| K01077                       | NA        | ortholog | 0        | 1.823924 |
| K01546                       | NA        | ortholog | 0        | -2.99733 |
| K01547                       | NA        | ortholog | 0        | -2.76471 |
| K01548                       | NA        | ortholog | 0        | -2.68725 |
| K01915                       | NA        | ortholog | 0        | -1.68281 |
| K07636                       | phoR      | ortholog | 0        | 1.184281 |
| K07639                       | rstB      | ortholog | 0        | -0.96957 |
| K07644                       | cusS      | ortholog | 0        | -1.95267 |
| K07657                       | phoB      | ortholog | 0        | 1.436191 |
| K07673                       | narX      | ortholog | 0        | -1.62945 |
| K07679                       | evgS      | ortholog | 0        | -1.50811 |
| K07684                       | narL      | ortholog | 0        | -1.87468 |
| K07687                       | rceB      | ortholog | 0        | 0.828397 |
| K07700                       | dpiB      | ortholog | 0        | 1.109582 |
| K07702                       | dpiA      | ortholog | 0        | 1.70362  |
| K07708                       | glnL      | ortholog | 0        | -1.45435 |
| K07709                       | zraS      | ortholog | 0        | -2.18901 |
| K07712                       | glnG      | ortholog | 0        | -1.18655 |
| K07806                       | arnB      | ortholog | 0        | 1.159767 |
| K08348                       | fdnG      | ortholog | -3.49741 | -4.59413 |

|        |      |          |          |          |
|--------|------|----------|----------|----------|
| K08350 | fdnI | ortholog | -4.71559 | -5.84957 |
| K09474 | phoN | ortholog | 0        | 1.912999 |
| K09475 | ompC | ortholog | 0        | -1.96918 |
| K10001 | gltI | ortholog | 0        | 4.905064 |
| K10002 | gltK | ortholog | 0        | 3.193442 |
| K10004 | gltL | ortholog | 0        | 3.177999 |
| K11103 | NA   | ortholog | 0        | 3.696715 |
| K11103 | NA   | ortholog | 0        | 3.696715 |
| K19611 | NA   | ortholog | 2.309351 | 2.716038 |

| ko03010 Ribosome |            |          | logFC    | logFC    |
|------------------|------------|----------|----------|----------|
| all.mapped       | all.mappec | type     | BR21_2h  | BR21_8h  |
| K02863           | NA         | ortholog | 0        | -1.35383 |
| K02864           | NA         | ortholog | 0        | -1.23678 |
| K02867           | NA         | ortholog | 0        | -1.55841 |
| K02871           | NA         | ortholog | 0        | -1.19324 |
| K02876           | NA         | ortholog | 0        | -1.30244 |
| K02878           | NA         | ortholog | 0        | -1.62668 |
| K02879           | NA         | ortholog | 0        | -1.29986 |
| K02881           | NA         | ortholog | 0        | -1.457   |
| K02884           | NA         | ortholog | 0        | -1.26276 |
| K02886           | NA         | ortholog | 0        | -1.31292 |
| K02887           | NA         | ortholog | -1.33299 | -1.22686 |
| K02890           | NA         | ortholog | 0        | -1.36872 |
| K02892           | NA         | ortholog | 0        | -1.63607 |
| K02895           | NA         | ortholog | 0        | -1.42844 |
| K02902           | NA         | ortholog | 0        | -1.02687 |
| K02906           | NA         | ortholog | 0        | -1.6212  |
| K02907           | NA         | ortholog | 0        | -1.40118 |
| K02909           | NA         | ortholog | 0        | -1.3848  |
| K02913           | NA         | ortholog | 0        | -1.26932 |
| K02914           | NA         | ortholog | 0        | -1.09276 |
| K02926           | NA         | ortholog | 0        | -1.28923 |
| K02931           | NA         | ortholog | 0        | -1.20961 |



|        |    |          |   |          |
|--------|----|----------|---|----------|
| K02933 | NA | ortholog | 0 | -1.46308 |
| K02935 | NA | ortholog | 0 | -1.9964  |
| K02946 | NA | ortholog | 0 | -1.36444 |
| K02956 | NA | ortholog | 0 | -1.11325 |
| K02965 | NA | ortholog | 0 | -1.22578 |
| K02967 | NA | ortholog | 0 | -1.21102 |
| K02968 | NA | ortholog | 0 | -1.62282 |
| K02982 | NA | ortholog | 0 | -1.24032 |
| K02988 | NA | ortholog | 0 | -1.43383 |
| K02990 | NA | ortholog | 0 | -1.29113 |
| K02992 | NA | ortholog | 0 | -0.90355 |
| K02994 | NA | ortholog | 0 | -1.25582 |
| K02996 | NA | ortholog | 0 | -1.15761 |

Table S4. Differentially expressed genes induced by stress regulons as a response to lethal imipenem exposure of heteroresistant KPC-producing *K. pneumoniae* study strains.

| GENE                                                                      | SEED CATEGORY               | SEED SUBCATEGC      | count     | RpoS      | CRP      | Fur      | CpxR     | rcs      | other      | osmo-ind** | BR7-2h-up | BR7-2h-down | BR21-2h-up | BR21-2h-down | BR7-8h-up | BR7-8h-down | BR21-8h-up | BR21-8h-down |
|---------------------------------------------------------------------------|-----------------------------|---------------------|-----------|-----------|----------|----------|----------|----------|------------|------------|-----------|-------------|------------|--------------|-----------|-------------|------------|--------------|
| Arginine N-succinyltransferase (EC 2.3.1.109); AstA                       | Amino Acids and Derivat     | Arginine; urea cyc  | 1         | 1         |          |          |          |          |            |            | 1         | 0           | 1          | 0            | 1         | 0           | 1          | 0            |
| Succinylornithine transaminase (EC 2.6.1.81); AstC                        | Amino Acids and Derivat     | Arginine; urea cyc  | 1         | 1         |          |          |          |          |            |            | 1         | 0           | 1          | 0            | 1         | 0           | 1          | 0            |
| Arginine ABC transporter, ATP-binding protein ArtP; up B21 8h only        | Amino Acids and Derivat     | Arginine; urea cyc  | 1         | 1         |          |          |          |          |            | 1          |           |             |            |              |           |             | 1          |              |
| Arginine ABC transporter, periplasmic arginine-binding protein ArtJ       | Amino Acids and Derivat     | Arginine; urea cyc  | 1         | 1         |          |          |          |          |            |            | 0         | 0           | 0          | 0            | 0         | 1           | 0          |              |
| gamma-aminobutyrate (GABA) permease, GabP; BLAST, uniprot confir          | Amino Acids and Derivat     | Arginine; urea cyc  | 1         | 1         | 1        |          |          |          |            |            | 1         |             |            |              | 1         | 1           |            |              |
| Putrescine ABC transporter putrescine-binding protein PotF (TC 3.A.1.1    | Amino Acids and Derivat     | Arginine; urea cyc  | 1         | 1         |          |          |          |          |            | 1          |           |             |            |              | 1         | 0           | 1          |              |
| Putrescine aminotransferase (EC 2.6.1.82); Putrescine:2-oxoglutaric aci   | Amino Acids and Derivat     | Arginine; urea cyc  | 1         | 1         |          |          |          |          | putrescine | 1          |           |             |            |              | 1         | 0           | 1          |              |
| Gamma-glutamyl-aminobutyraldehyde dehydrogenase (EC 1.2.1.-); pu          | Amino Acids and Derivat     | Arginine; urea cyc  | 1         | 1         | 1        |          |          |          |            | 1          | 1         | 0           | 1          | 0            | 1         | 0           | 1          | 0            |
| Gamma-aminobutyrate:alpha-ketoglutarate aminotransferase (EC 2.6.1        | Amino Acids and Derivat     | Arginine; urea cyc  | 1         | 1         | 1        |          |          |          |            |            | 0         | 0           | 0          | 0            | 1         | 0           | 1          | 0            |
| 4-aminobutyraldehyde dehydrogenase (EC 1.2.1.19), PatD                    | Amino Acids and Derivat     | Arginine; urea cyc  | 1         | 1         |          |          |          |          |            |            | 0         | 0           | 0          | 0            | 1         | 0           | 1          | 0            |
| Isochorismate synthase (EC 5.4.4.2) of siderophore biosynthesis; entC     | Amino Acids and Derivat     | Aromatic amino a    | 1         | 0         | 1        | 1        |          |          |            |            | 0         | 0           | 1          | 0            | 0         | 1           | 1          | 0            |
| Aspartate--ammonia ligase (EC 6.3.1.1); asnA                              | Amino Acids and Derivat     | Glutamine, glutan   | 1         | 0         |          |          | 1        |          |            |            | 0         | 0           | 0          | 1            | 0         | 1           | 0          | 1            |
| Threonine dehydratase, catabolic (EC 4.3.1.19) TdcB                       | Amino Acids and Derivat     | Lysine, threonine,  | 1         | 0         | 1        | 1        |          |          |            | 1          |           |             |            |              | 1         | 0           | 1          |              |
| Trans-aconitate 2-methyltransferase (EC 2.1.1.144); up B21 8h             | Amino Acids and Derivat     | Lysine, threonine,  | 1         | 1         |          |          |          |          |            |            | 0         | 0           | 0          | 0            | 0         | 1           | 0          | 0            |
| Proline/sodium symporter PutP (TC 2.A.21.2.1)                             | Amino Acids and Derivat     | Proline and 4-hyd   | 1         |           | 1        |          |          |          |            |            | 1         | 0           | 0          | 0            | 1         | 0           | 1          | 0            |
| <b>SUBTOTAL</b>                                                           |                             |                     | <b>15</b> | <b>11</b> | <b>6</b> | <b>2</b> | <b>1</b> | <b>0</b> |            | <b>5</b>   | <b>5</b>  | <b>0</b>    | <b>4</b>   | <b>1</b>     | <b>9</b>  | <b>2</b>    | <b>14</b>  | <b>1</b>     |
| UPF0229 protein YeaH; up B7 B21 8h                                        | Carbohydrates               | Carbohydrates - n   | 1         | 1         |          |          |          |          |            | 1          |           |             |            |              | 1         | 0           | 1          |              |
| 2,5-diketo-D-gluconate reductase A (EC 1.1.1.274) up B7 B21 8h            | Carbohydrates               | Central carbohydr   | 1         | 1         |          |          |          |          |            | 1          |           |             |            |              | 1         | 0           | 1          |              |
| Aconitate hydratase (EC 4.2.1.3); acnA (also listed metab tab)            | Carbohydrates               | Central carbohydr   | 1         | 1         |          |          |          |          |            |            | 0         | 0           | 0          | 0            | 1         | 0           | 1          | 0            |
| Fructose-bisphosphate aldolase class I (EC 4.1.2.13) up B7 B21 8h         | Carbohydrates               | Central carbohydr   | 1         | 1         |          |          |          |          |            | 1          |           |             |            |              | 1         | 0           | 1          |              |
| Glucose-6-phosphate isomerase (EC 5.3.1.9)                                | Carbohydrates               | Central carbohydr   | 1         | 0         |          |          |          | 1        |            |            | 0         | 0           | 0          | 0            | 0         | 0           | 0          | 1            |
| Pyruvate oxidase [ubiquinone, cytochrome] (EC 1.2.2.2); up B21 8h onh     | Carbohydrates               | Central carbohydr   | 1         | 1         |          |          |          |          |            | 1          |           |             |            |              | 0         | 1           |            |              |
| Transcriptional repressor for pyruvate dehydrogenase complex (poxB);      | Carbohydrates               | Central carbohydr   | 1         | 1         | 1        |          |          |          |            |            |           |             |            |              | 1         | 0           | 1          |              |
| Alpha,alpha-trehalose-phosphate synthase [UDP-forming] (EC 2.4.1.15)      | Carbohydrates               | Di- and oligosacch  | 1         | 1         |          |          |          |          |            | 1          |           |             |            |              |           | 0           | 1          |              |
| cytoplasmic alpha-amylase up B7 B21 8h                                    | Carbohydrates               | Di- and oligosacch  | 1         | 1         |          |          |          |          |            |            |           |             |            |              | 1         | 0           | 1          |              |
| Maltose/maltodextrin ABC transporter, permease protein MalF               | Carbohydrates               | Di- and oligosacch  | 1         | 0         | 1        |          |          |          | BaeRS      |            | 0         | 0           | 0          | 0            | 0         | 0           | 0          | 1            |
| Maltose/maltodextrin ABC transporter, permease protein MalG               | Carbohydrates               | Di- and oligosacch  | 1         | 0         | 1        |          |          |          | BaeRS      |            | 0         | 0           | 0          | 0            | 1         | 0           | 0          | 1            |
| Trehalase (EC 3.2.1.28); Periplasmic trehalase precursor (EC 3.2.1.28); t | Carbohydrates               | Di- and oligosacch  | 1         | 1         |          |          |          |          |            | 1          |           |             |            |              | 1         | 0           | 1          |              |
| Trehalose-6-phosphate phosphatase (EC 3.1.3.12); up B21 8h only           | Carbohydrates               | Di- and oligosacch  | 1         | 1         |          |          |          |          |            | 1          |           |             |            |              |           | 0           | 1          |              |
| Alcohol dehydrogenase (EC 1.1.1.1) up B7 B21 8h; caution: 4 copies of     | Carbohydrates               | Fermentation        | 1         | 1         |          |          |          |          |            | 1          |           |             |            |              | 1         | 0           | 1          |              |
| ethanolamine permease; up B21 8h only; tBLASTn confirmed specific g       | Carbohydrates               | Sugar alcohols      | 1         | 1         |          |          |          |          |            |            |           |             |            |              | 0         | 1           |            |              |
| Glycerol-3-phosphate ABC transporter, ATP-binding protein UgpC (TC 3      | Carbohydrates               | Sugar alcohols      | 1         | 1         | 1        |          |          |          | PhoB       |            | 1         |             |            |              | 1         | 1           |            |              |
| Glycerol-3-phosphate ABC transporter, periplasmic glycerol-3-phosphat     | Carbohydrates               | Sugar alcohols      | 1         | 1         | 1        |          |          |          | PhoB       | 1          | 1         |             |            |              | 1         | 1           |            |              |
| Glycerol-3-phosphate ABC transporter, permease protein UgpA (TC 3.A       | Carbohydrates               | Sugar alcohols      | 1         | 1         | 1        |          |          |          | PhoB       |            | 1         |             |            |              | 1         | 1           |            |              |
| Glycerol-3-phosphate ABC transporter, permease protein UgpE (TC 3.A.      | Carbohydrates               | Sugar alcohols      | 1         | 1         | 1        |          |          |          | PhoB       |            | 1         |             |            |              | 1         | 1           |            |              |
| Glycerol-3-phosphate transporter; GlpT                                    | Carbohydrates               | Sugar alcohols      | 1         | 0         | 1        |          |          |          |            |            |           |             | 1          | 1            |           | 1           |            |              |
| Glycerophosphoryl diester phosphodiesterase, periplasmic; GlpQ (EC 3      | Carbohydrates               | Sugar alcohols      | 1         | 0         | 1        |          |          |          |            |            | 1         |             | 1          | 1            |           | 0           | 1          |              |
| Mannitol-1-phosphate 5-dehydrogenase (EC 1.1.1.17)                        | Carbohydrates - stress      | Sugar alcohols      | 1         |           |          |          |          |          |            |            | 0         | 0           | 0          | 0            | 1         | 0           | 1          | 0            |
| Sorbitol-6-phosphate 2-dehydrogenase (EC 1.1.1.140)                       | Carbohydrates-stress        | Monosaccharides     | 1         |           |          |          |          |          |            |            | 0         | 0           | 0          | 0            | 0         | 0           | 1          | 0            |
| <b>SUBTOTAL</b>                                                           |                             |                     | <b>23</b> | <b>16</b> | <b>9</b> | <b>0</b> | <b>0</b> | <b>1</b> |            | <b>9</b>   | <b>6</b>  | <b>0</b>    | <b>2</b>   | <b>0</b>     | <b>15</b> | <b>1</b>    | <b>19</b>  | <b>4</b>     |
| Lipoprotein nlpI precursor                                                | Cell Division and Cell Cycl | Cell Division and C | 1         | 1         |          |          |          |          |            |            |           |             |            |              | 0         | 0           | 0          | 1            |
| Cyclopropane-fatty-acyl-phospholipid synthase (EC 2.1.1.79), plant typ    | Cell Division and Cell Cycl | Cell Division and C | 1         | 1         |          |          |          |          |            |            | 0         | 0           | 0          | 1            | 0         | 0           | 0          | 0            |
| Cell filamentation protein fic; up B21 8h only; tBLASTn found homolog     | Cell Division and Cell Cycl | Cell Division and C | 1         | 1         |          |          |          |          |            | 1          |           |             |            |              |           | 0           | 1          |              |
| <b>SUBTOTAL</b>                                                           |                             |                     | <b>3</b>  | <b>3</b>  | <b>0</b> | <b>0</b> | <b>0</b> | <b>0</b> |            | <b>1</b>   | <b>0</b>  | <b>0</b>    | <b>0</b>   | <b>2</b>     | <b>0</b>  | <b>0</b>    | <b>1</b>   | <b>1</b>     |
| L,D-transpeptidase ErfK linking Lpp to murein; up B7, B21 8h; osmotic s   | Cell Wall and Capsule       | Cell Wall and Caps  | 1         | 1         |          |          |          |          |            | 1          |           |             |            |              | 1         | 0           | 1          |              |
| L,D-transpeptidase YcfS                                                   | Cell Wall and Capsule       | Cell Wall and Caps  | 1         | 0         |          |          | 1        |          |            |            | 0         | 0           | 0          | 0            | 0         | 0           | 1          | 0            |
| L,D-transpeptidase YnhG; up B7 B21 8h; cell wall                          | Cell Wall and Capsule       | Cell Wall and Caps  | 1         | 1         |          |          |          |          |            | 1          |           |             |            |              | 1         | 0           | 1          |              |
| Lipid A biosynthesis lauroyl acyltransferase (EC 2.3.1.-)                 | Cell Wall and Capsule       | Gram-Negative ce    | 1         | 0         |          |          |          | 1        |            |            | 0         | 0           | 0          | 0            | 0         | 1           | 0          | 1            |
| Lipoprotein NlpD                                                          | Cell Wall and Capsule       | Gram-Negative ce    | 1         | 1         |          |          |          |          |            |            | 0         | 0           | 0          | 0            | 0         | 0           | 1          | 0            |
| Outer membrane chaperone Skp (OmpH) precursor                             | Cell Wall and Capsule       | Gram-Negative ce    | 1         |           |          |          |          |          | rpoE       |            | 0         | 0           | 0          | 0            | 0         | 0           | 0          | 1            |
| Uncharacterized protein YhjG; up B7 B21 8h                                | Cell Wall and Capsule       | Gram-Negative ce    | 1         | 1         |          |          |          |          |            | 1          |           |             |            |              | 1         | 0           | 1          |              |
| <b>SUBTOTAL</b>                                                           |                             |                     | <b>7</b>  | <b>4</b>  | <b>0</b> | <b>0</b> | <b>1</b> | <b>1</b> |            | <b>3</b>   | <b>0</b>  | <b>0</b>    | <b>0</b>   | <b>0</b>     | <b>3</b>  | <b>1</b>    | <b>5</b>   | <b>2</b>     |
| DNA repair protein RecN                                                   | DNA Metabolism              | DNA repair          | 1         |           |          |          |          |          |            |            |           | 0           | 0          | 0            | 0         | 0           | 1          | 0            |
| Cold shock protein CspD                                                   | Stress Response             | Cold shock          | 1         | 0         | 1        |          |          |          |            |            | 1         | 0           | 0          | 0            | 1         | 0           | 1          | 0            |
| <b>SUBTOTAL</b>                                                           |                             |                     | <b>2</b>  | <b>0</b>  | <b>1</b> | <b>0</b> | <b>0</b> | <b>0</b> | <b>0</b>   | <b>0</b>   | <b>1</b>  | <b>0</b>    | <b>0</b>   | <b>0</b>     | <b>1</b>  | <b>0</b>    | <b>2</b>   | <b>0</b>     |
| Conidiation-specific protein 10; up B21 8h                                | Dormancy and Sporulat       | Dormancy and Sp     | 1         | 1         |          |          |          |          |            | 1          |           |             |            |              |           | 0           | 1          |              |
| FIG004684; SpoVR-like protein; up B7 B21 8h                               | Dormancy and Sporulat       | Dormancy and Sp     | 1         | 1         |          |          |          |          | rpoE       | 1          |           |             |            |              | 1         | 0           | 1          |              |
| <b>SUBTOTAL</b>                                                           |                             |                     | <b>2</b>  | <b>2</b>  | <b>0</b> | <b>0</b> | <b>0</b> | <b>0</b> |            | <b>2</b>   | <b>0</b>  | <b>0</b>    | <b>0</b>   | <b>0</b>     | <b>1</b>  | <b>0</b>    | <b>2</b>   | <b>0</b>     |
| Acyl-CoA dehydrogenase (EC 1.3.8.7); up B7 B21 8h; tBLASTn confirmer      | Fatty Acids, Lipids, and Is | Fatty acids         | 1         | 1         |          |          |          |          |            |            |           |             |            |              | 1         | 0           | 1          |              |
| <b>SUBTOTAL</b>                                                           |                             |                     | <b>1</b>  | <b>1</b>  | <b>0</b> | <b>0</b> | <b>0</b> | <b>0</b> |            | <b>0</b>   | <b>0</b>  | <b>0</b>    | <b>0</b>   | <b>0</b>     | <b>1</b>  | <b>0</b>    | <b>1</b>   | <b>0</b>     |
| GENE                                                                      | SEED CATEGORY               | SEED SUBCATEGC      | count     | RpoS      | CRP      | Fur      | CpxR     | rcs      | other      | osmo-ind** | BR7-2h-up | BR7-2h-down | BR21-2h-up | BR21-2h-down | BR7-8h-up | BR7-8h-down | BR21-8h-up | BR21-8h-down |
| Bacterioferritin; up B7 B21 8h                                            | Iron acquisition and met    | Iron acquisition a  | 1         | 1         |          |          |          |          |            |            |           |             |            |              | 1         | 0           | 1          |              |
| Ferric reductase (1.6.99.14); fhuF                                        | Iron acquisition and met    | Iron acquisition a  | 1         | 0         |          | 1        |          |          | OxyR       |            | 0         | 0           | 0          | 0            | 0         | 0           | 1          | 0            |
| TonB-dependent receptor; Outer membrane receptor for ferric enterob       | Iron acquisition and met    | Iron acquisition a  | 1         | 0         | 1        | 1        |          |          |            |            | 0         | 0           | 1          | 0            | 0         | 1           | 1          | 0            |
| 2,3-dihydro-2,3-dihydroxybenzoate dehydrogenase (EC 1.3.1.28) [enter      | Iron acquisition and met    | Siderophores        | 1         | 0         | 1        | 1        |          |          |            |            | 0         | 0           | 0          | 0            | 0         | 0           | 1          | 0            |
| Enterobactin synthetase component F, serine activating enzyme (EC 2.7     | Iron acquisition and met    | Siderophores        | 1         | 0         | 1        | 1        |          |          |            |            | 0         | 0           | 1          | 0            | 0         | 1           | 1          | 0            |
| Proofreading thioesterase in enterobactin biosynthesis EntH               | Iron acquisition and met    | Siderophores        | 1         | 0         | 1        | 1        |          |          |            |            | 0         | 0           | 0          | 0            | 0         | 1           | 1          | 0            |

|                                                                           |  |  |                           |                    |       |      |     |     |      |      |       |            |           |             |            |              |           |             |            |              |
|---------------------------------------------------------------------------|--|--|---------------------------|--------------------|-------|------|-----|-----|------|------|-------|------------|-----------|-------------|------------|--------------|-----------|-------------|------------|--------------|
| Non-specific DNA-binding protein Dps / Iron-binding ferritin-like antioxi |  |  | Iron acquisition and meta | Iron acquisition a | 1     | 1    |     |     |      | OxyR | 1     | 0          | 0         | 0           | 0          | 1            | 0         | 1           | 0          |              |
| SUBTOTAL                                                                  |  |  |                           |                    | 7     | 2    | 4   | 5   | 0    | 0    | 1     | 0          | 0         | 2           | 0          | 2            | 3         | 7           | 0          |              |
| ABC transporter ATP-binding protein (Tn5 mutant)                          |  |  | Membrane Transport        | ABC transporters   | 1     |      |     |     |      |      |       | 0          | 0         | 0           | 0          | 0            | 0         | 1           | 0          |              |
| Glutamine ABC transporter, periplasmic glutamine-binding protein (TC      |  |  | Membrane Transport        | ABC transporters   | 1     |      |     |     |      |      |       | 0          | 0         | 0           | 0          | 1            | 0         | 1           | 0          |              |
| cation transport regulator chaB; up B7 B21 8h                             |  |  | Membrane Transport        | Cation transport   | 1     | 1    |     |     |      |      | 1     |            |           |             | 1          | 0            | 1         |             |            |              |
| Outer membrane protein X precursor                                        |  |  | Membrane Transport        | Cation transport   | 1     | 1    |     | 1   |      |      |       | 0          | 0         | 0           | 0          | 0            | 0         | 1           |            |              |
| Putative PerM family permease; up B21 8h only                             |  |  | Membrane Transport        | Membrane Transp    | 1     | 1    |     |     |      |      | 1     |            |           |             |            | 0            | 1         |             |            |              |
| Transcriptional activator NhaR                                            |  |  | Membrane Transport        | Uni- Sym- and Ani  | 1     | 0    |     |     | 1    |      |       | 0          | 0         | 0           | 0          | 0            | 0         | 1           |            |              |
| SUBTOTAL                                                                  |  |  |                           |                    | 6     | 3    | 0   | 0   | 1    | 1    | 2     | 0          | 0         | 0           | 0          | 2            | 0         | 4           | 2          |              |
| Nitrate/nitrite transporter NarK; up B7 B21 8h; tBLASTn 75% homology      |  |  | Nitrogen Metabolism       | Denitrification    | 1     | 1    |     |     |      |      |       |            |           |             | 1          | 0            | 1         |             |            |              |
| Respiratory nitrate reductase alpha chain, narG (EC 1.7.99.4)             |  |  | Nitrogen Metabolism       | Nitrogen Metabol   | 1     | 0    |     | 1   |      | Fnr  |       | 0          | 1         | 0           | 0          | 0            | 1         | 0           | 1          |              |
| Respiratory nitrate reductase beta chain, narY (EC 1.7.99.4); down all sa |  |  | Nitrogen Metabolism       | Nitrogen Metabol   | 1     | 1    |     |     |      |      | 1     | 1          | 0         | 1           | 0          | 1            | 0         | 1           |            |              |
| SUBTOTAL                                                                  |  |  |                           |                    | 3     | 2    | 0   | 0   | 1    | 0    | 1     | 0          | 2         | 0           | 1          | 1            | 2         | 1           | 2          |              |
| ATP-dependent Clp protease ATP-binding subunit ClpA                       |  |  | Protein Metabolism        | Protein degradati  | 1     |      |     |     |      |      |       | 0          | 0         | 0           | 0          | 1            | 0         | 0           | 0          |              |
| FKBP-type peptidyl-prolyl cis-trans isomerase FkpA precursor (EC 5.2.1.1) |  |  | Protein Metabolism        | Protein folding    | 1     |      |     |     |      | RpoE |       | 0          | 0         | 0           | 0          | 1            |           |             | 1          |              |
| Acidic protein msyB; up B7 B21 8h                                         |  |  | Protein Metabolism        | Protein folding    | 1     | 1    |     |     |      |      |       |            |           |             | 1          | 0            | 1         |             |            |              |
| Chaperone protein DnaJ                                                    |  |  | Protein Metabolism        | Protein folding    | 1     | 0    |     |     | 1    |      |       | 0          | 0         | 0           | 0          | 0            | 0         | 1           |            |              |
| Chaperone protein DnaK                                                    |  |  | Protein Metabolism        | Protein folding    | 1     | 0    |     |     | 1    |      |       | 0          | 0         | 0           | 0          | 0            | 0         | 1           |            |              |
| MicA, non-coding RNA                                                      |  |  | Protein Metabolism        | Protein folding    | 1     |      |     |     |      | RpoE |       |            |           |             | 1          | 0            | 1         |             |            |              |
| Chaperone protein HtpG                                                    |  |  | Protein Metabolism        | Protein folding    | 1     | 0    |     |     |      | RpoH |       | 0          | 0         | 0           | 0          | 0            | 0         | 1           |            |              |
| SUBTOTAL                                                                  |  |  |                           |                    | 7     | 1    | 0   | 0   | 0    | 2    | 0     | 0          | 0         | 0           | 3          | 0            | 2         | 4           |            |              |
| Biofilm PGA outer membrane secretin PgaA                                  |  |  | Regulation and Cell signa | Quorum sensing z   | 1     | 0    |     |     | 1    |      |       | 0          | 0         | 0           | 0          | 0            | 0         | 1           | 0          |              |
| DNA-binding capsular synthesis response regulator RcsB                    |  |  | Regulation and Cell signa | Regulation and Ce  | 1     | 0    |     |     | 1    |      |       | 0          | 0         | 0           | 0          | 0            | 0         | 1           | 0          |              |
| SUBTOTAL                                                                  |  |  |                           |                    | 2     | 0    | 0   | 0   | 0    | 2    | 0     | 0          | 0         | 0           | 0          | 0            | 0         | 2           | 0          |              |
| Electron transport complex protein RnfA                                   |  |  | Respiration               | Electron donating  | 1     | 0    |     |     | 1    |      |       | 0          | 0         | 0           | 0          | 0            | 1         | 0           | 0          |              |
| Succinate-semialdehyde dehydrogenase [NAD] (EC 1.2.1.24); Succinate-      |  |  | Respiration               | Electron donating  | 1     | 1    |     |     |      |      |       | 0          | 0         | 0           | 0          | 0            | 0         | 1           | 0          |              |
| SUBTOTAL                                                                  |  |  |                           |                    | 2     | 1    | 0   | 0   | 1    | 0    | 0     | 0          | 0         | 0           | 0          | 0            | 1         | 1           | 0          |              |
| micL, non coding RNA (Lipid A precursor)                                  |  |  | RNA Metabolism            | RNA processing a   | 1     |      |     |     |      | RpoE |       |            |           |             |            |              |           | 1           |            |              |
| RNA polymerase sigma factor RpoS                                          |  |  | RNA Metabolism            | Transcription      | 1     | 1    |     |     |      |      |       | 0          | 0         | 0           | 0          | 1            | 0         | 1           | 0          |              |
| Iron-sulfur cluster assembly protein SufB                                 |  |  | RNA Metabolism            | RNA processing a   | 1     | 1    |     | 1   |      | OxyR |       | 0          | 0         | 0           | 0          | 0            | 0         | 1           | 0          |              |
| SUBTOTAL                                                                  |  |  |                           |                    | 3     | 2    | 0   | 1   | 0    | 0    | 0     | 0          | 0         | 0           | 1          | 0            | 3         | 0           | 0          |              |
| Choline-glycine betaine transporter                                       |  |  | Stress Response           | Osmotic stress     | 1     | 0    |     |     |      |      |       | 0          | 0         | 0           | 0          | 1            | 0         | 1           | 0          |              |
| DedA family inner membrane protein YdjX                                   |  |  | Stress Response           | Osmotic stress     | 1     | 0    |     |     |      |      |       | 0          | 0         | 0           | 0          | 0            | 1         | 0           | 1          |              |
| DedA family inner membrane protein YghB                                   |  |  | Stress Response           | Osmotic stress     | 1     | 0    |     |     |      |      |       | 0          | 0         | 0           | 0          | 0            | 0         | 0           | 1          |              |
| Entericidin B precursor; entB                                             |  |  | Stress Response           | Osmotic stress     | 1     | 0    |     | 1   | 1    |      |       | 0          | 0         | 0           | 0          | 0            | 0         | 1           | 0          |              |
| General stress protein 18                                                 |  |  | Stress Response           | Osmotic stress     | 1     | 1    |     |     |      |      |       | 0          | 0         | 0           | 0          | 1            | 0         | 1           | 0          |              |
| Glutathione S-transferase, omega (EC 2.5.1.18)                            |  |  | Stress Response           | Osmotic stress     | 1     | 1    |     |     |      |      |       | 0          | 0         | 0           | 0          | 1            | 0         | 1           | 0          |              |
| Glutathione S-transferase, theta (EC 2.5.1.18)                            |  |  | Stress Response           | Osmotic stress     | 1     | 1    |     |     |      |      |       | 0          | 0         | 0           | 0          | 1            | 0         | 1           | 0          |              |
| Hnr protein; response regulator, protein turnover, controls stability of  |  |  | Stress Response           | Osmotic stress     | 1     | 1    |     |     |      |      |       | 0          | 0         | 0           | 0          | 0            | 0         | 1           | 0          |              |
| L-proline glycine betaine ABC transport system permease protein ProV      |  |  | Stress Response           | Osmotic stress     | 1     | 0    |     |     |      |      |       | 0          | 0         | 0           | 0          | 0            | 0         | 1           | 0          |              |
| L-proline glycine betaine binding ABC transporter protein ProX (TC 3.A.1  |  |  | Stress Response           | Osmotic stress     | 1     | 0    |     |     |      |      |       | 0          | 0         | 0           | 0          | 0            | 0         | 1           | 0          |              |
| Osmoprotectant ABC transporter ATP-binding subunit YehX                   |  |  | Stress Response           | Osmotic stress     | 1     | 0    |     |     |      |      |       | 0          | 0         | 0           | 0          | 0            | 0         | 1           | 0          |              |
| Osmoprotectant ABC transporter binding protein YehZ                       |  |  | Stress Response           | Osmotic stress     | 1     | 0    |     |     |      |      |       | 0          | 0         | 0           | 0          | 1            | 0         | 1           | 0          |              |
| Osmoprotectant ABC transporter inner membrane protein YehW                |  |  | Stress Response           | Osmotic stress     | 1     | 0    |     |     |      |      |       | 0          | 0         | 0           | 0          | 0            | 0         | 1           | 0          |              |
| Osmoprotectant ABC transporter permease protein YehY                      |  |  | Stress Response           | Osmotic stress     | 1     | 0    |     |     |      |      |       | 0          | 0         | 0           | 0          | 0            | 0         | 1           | 0          |              |
| Osmotically inducible lipoprotein B precursor: OsmB                       |  |  | Stress Response           | Osmotic stress     | 1     | 1    |     |     | 1    | 1    |       | 0          | 0         | 0           | 0          | 0            | 0         | 1           | 0          |              |
| Osmotically inducible lipoprotein E precursor; OsmE                       |  |  | Stress Response           | Osmotic stress     | 1     | 1    |     |     |      |      |       | 0          | 0         | 0           | 0          | 1            | 0         | 1           | 0          |              |
| Osmotically inducible protein C OsmC                                      |  |  | Stress Response           | Osmotic stress     | 1     | 1    |     | 1   |      | 1    |       | 0          | 0         | 0           | 0          | 1            | 0         | 1           | 0          |              |
| Osmotically inducible protein OsmY                                        |  |  | Stress Response           | Osmotic stress     | 1     | 1    |     | 1   |      |      |       | 0          | 0         | 0           | 0          | 1            | 0         | 1           | 0          |              |
| Outer membrane lipoprotein blc precursor                                  |  |  | Stress Response           | Osmotic stress     | 1     | 1    |     |     |      |      |       | 0          | 0         | 0           | 0          | 1            | 0         | 1           | 0          |              |
| Phosphate starvation-inducible protein PsfF                               |  |  | Stress Response           | Osmotic stress     | 1     | 1    |     |     |      |      |       | 0          | 0         | 0           | 0          | 1            | 0         | 1           | 0          |              |
| Protein involved in stability of MscS mechanosensitive channel            |  |  | Stress Response           | Osmotic stress     | 1     | 0    |     |     |      |      |       | 0          | 0         | 0           | 0          | 0            | 0         | 0           | 1          |              |
| Universal stress protein B; cell death in stat phase when overexpressed   |  |  | Stress Response           | Osmotic stress     | 1     | 1    |     | 1   |      | 1    |       | 0          | 0         | 0           | 0          | 1            | 0         | 1           | 0          |              |
| COG1683: Uncharacterized conserved protein / FIG143828: Hypothetic        |  |  | Uncharacterized           | Osmotic stress     | 1     | 1    |     |     |      |      |       |            |           |             | 1          |              |           |             |            |              |
| FIG00638451: hypothetical protein yiaG putative transcriptional regula    |  |  | Uncharacterized           | Osmotic stress     | 1     | 1    |     |     |      |      |       |            |           |             |            |              |           |             |            |              |
| GENE                                                                      |  |  | SEED CATEGORY             | SEED SUBCATEGC     | count | RpoS | CRP | Fur | CpxR | rcs  | other | osmo-ind** | BR7-2h-up | BR7-2h-down | BR21-2h-up | BR21-2h-down | BR7-8h-up | BR7-8h-down | BR21-8h-up | BR21-8h-down |
| Inner membrane protein YphA; up B21 8h                                    |  |  | Uncharacterized           | Osmotic stress     | 1     | 1    |     |     |      |      |       |            |           |             |            |              |           |             | 1          |              |
| Probable secreted protein; up B7 B21 8h                                   |  |  | Uncharacterized           | Osmotic stress     | 1     | 1    |     |     |      |      |       |            |           |             |            |              | 1         | 0           | 1          |              |
| Protein YaiA; up B21 8h only                                              |  |  | Uncharacterized           | Osmotic stress     | 1     | 1    |     |     |      |      |       |            |           |             |            |              |           | 0           | 1          |              |
| Protein YgiF; up B21 8h only                                              |  |  | Uncharacterized           | Osmotic stress     | 1     | 1    |     |     |      |      |       |            |           |             |            |              |           | 0           | 1          |              |
| Putative oxidoreductase YncB; up B21 8h only                              |  |  | Uncharacterized           | Osmotic stress     | 1     | 1    |     |     |      |      |       |            |           |             |            |              |           | 0           | 1          |              |
| UPF0028 protein YchK aka rssA; up B21 8h only; annot as misc. uniprot     |  |  | Uncharacterized           | Osmotic stress     | 1     | 1    |     |     |      |      |       |            |           |             |            |              |           | 0           | 1          |              |
| Dipeptide transport ATP-binding protein DppF (TC 3.A.1.5.2)               |  |  | Stress Response           | Osmotic stress     | 1     | 0    |     | 1   |      |      |       | 0          | 0         | 0           | 0          | 0            | 0         | 0           | 1          | 0            |
| Dipeptide transport system permease protein DppB (TC 3.A.1.5.2)           |  |  | Stress Response           | Osmotic stress     | 1     | 0    |     | 1   |      |      |       | 0          | 0         | 0           | 0          | 1            | 0         | 0           | 1          | 0            |
| Dipeptide transport system permease protein DppC (TC 3.A.1.5.2)           |  |  | Stress Response           | Osmotic stress     | 1     | 0    |     | 1   |      |      |       | 0          | 0         | 0           | 0          | 0            | 0         | 0           | 1          | 0            |
| Dipeptide-binding ABC transporter, periplasmic substrate-binding com      |  |  | Stress Response           | Osmotic stress     | 1     | 0    |     | 1   |      |      |       | 0          | 0         | 0           | 0          | 0            | 0         | 0           | 1          | 0            |
| SUBTOTAL                                                                  |  |  |                           |                    | 34    | 19   | 4   | 5   | 1    | 2    | 1     | 0          | 0         | 0           | 1          | 14           | 1         | 30          | 3          | 0            |
| Catalase (EC 1.11.1.6)                                                    |  |  | Stress Response           | Oxidative stress   | 1     | 1    |     |     |      |      |       | 0          | 0         | 0           | 0          | 1            | 0         | 1           | 0          | 0            |
| Cell wall endopeptidase, family M23/M37                                   |  |  | Stress Response           | Oxidative stress   | 1     | 0    |     |     |      |      |       | 0          | 0         | 0           | 0          | 0            | 0         | 0           | 1          | 0            |
| Gamma-glutamyltranspeptidase (EC 2.3.2.2)                                 |  |  | Stress Response           | Oxidative stress   | 1     | 0    |     |     |      |      |       | 0          | 0         | 0           | 0          | 1            | 0         | 1           | 0          | 0            |

|                                                                          |                                      |                      |       |      |     |     |      |      |            |            |           |             |            |              |           |             |            |              |
|--------------------------------------------------------------------------|--------------------------------------|----------------------|-------|------|-----|-----|------|------|------------|------------|-----------|-------------|------------|--------------|-----------|-------------|------------|--------------|
| Glutathione peroxidase family protein                                    | Stress Response                      | Oxidative stress     | 1     | 0    |     |     |      |      | 0          | 0          | 0         | 0           | 0          | 0            | 0         | 1           | 0          |              |
| Glutathione reductase (EC 1.8.1.7)                                       | Stress Response                      | Oxidative stress     | 1     | 0    |     |     |      |      | 0          | 0          | 0         | 0           | 0          | 0            | 0         | 0           | 1          |              |
| Glutathione S-transferase (EC 2.5.1.18)                                  | Stress Response                      | Oxidative stress     | 1     | 0    |     |     |      |      | 0          | 0          | 0         | 0           | 0          | 0            | 0         | 1           | 0          |              |
| Manganese catalase (EC 1.11.1.6)                                         | Stress Response                      | Oxidative stress     | 1     | 0    |     |     |      |      | 0          | 0          | 0         | 0           | 0          | 0            | 0         | 1           | 0          |              |
| Non-heme chloroperoxidase (EC 1.11.1.10)                                 | Stress Response                      | Oxidative stress     | 1     | 0    |     |     |      |      | 0          | 0          | 0         | 0           | 1          | 0            | 1         | 0           | 0          |              |
| Probable glutathione S-transferase (EC 2.5.1.18), YfcG homolog           | Stress Response                      | Oxidative stress     | 1     | 0    |     |     |      |      | 0          | 0          | 0         | 0           | 0          | 0            | 1         | 0           | 0          |              |
| Regulatory protein SoxS                                                  | Stress Response                      | Oxidative stress     | 1     | 0    |     |     |      |      | 0          | 0          | 1         | 0           | 0          | 0            | 0         | 0           | 0          |              |
| Regulatory protein soxS                                                  | Stress Response                      | Oxidative stress     | 1     | 0    |     |     |      |      | 0          | 1          | 0         | 1           | 0          | 1            | 0         | 1           | 0          |              |
| Senescence marker protein-30                                             | Stress Response                      | Oxidative stress     | 1     | 0    |     |     |      |      | 0          | 0          | 0         | 0           | 0          | 0            | 1         | 0           | 0          |              |
| Superoxide dismutase [Cu-Zn] precursor (EC 1.15.1.1)                     | Stress Response                      | Oxidative stress     | 1     | 0    |     |     |      |      | 0          | 0          | 0         | 0           | 0          | 0            | 1         | 0           | 0          |              |
| Superoxide dismutase [Fe] (EC 1.15.1.1)                                  | Stress Response                      | Oxidative stress     | 1     | 0    |     |     |      |      | 0          | 0          | 0         | 0           | 0          | 0            | 1         | 0           | 0          |              |
| Thioredoxin 2 (EC 1.8.1.8); TrxC                                         | Stress Response                      | Oxidative stress     | 1     | 0    | 1   |     |      | OxyR | 1          | 0          | 0         | 0           | 1          | 0            | 1         | 0           | 0          |              |
| SUBTOTAL                                                                 |                                      |                      | 15    | 1    | 1   | 0   | 0    | 0    | 0          | 1          | 1         | 1           | 1          | 4            | 1         | 12          | 2          |              |
| L,D-transpeptidase YcfS                                                  | Stress Response                      | Peptidoglycan damage | 1     | 0    |     |     |      |      | 0          | 0          | 0         | 0           | 0          | 0            | 1         | 0           | 0          |              |
| SUBTOTAL                                                                 |                                      |                      | 1     | 0    | 0   | 0   | 0    | 0    | 0          | 0          | 0         | 0           | 0          | 0            | 1         | 0           | 0          |              |
| UPF0337 protein - YjbJ-unchar general stress protein                     | Stress Response                      | Stress Response      | 1     | 1    |     |     |      | 1    | 1          | 0          | 0         | 0           | 1          | 0            | 1         | 0           | 0          |              |
| Carbon starvation induced protein CsiD                                   | Stress Response                      | Stress Response      | 1     | 1    | 1   |     |      | 1    | 1          | 0          | 0         | 0           | 1          | 0            | 1         | 0           | 0          |              |
| FOG: GGDEF domain                                                        | Stress Response                      | Stress Response      | 1     | 0    |     |     |      |      | 0          | 0          | 0         | 0           | 0          | 0            | 1         | 0           | 0          |              |
| GGDEF family protein                                                     | Stress Response                      | Stress Response      | 1     | 0    |     |     |      |      | 0          | 0          | 0         | 0           | 0          | 0            | 1         | 0           | 0          |              |
| Membrane-bound metal-dependent hydrolase YdjM, induced during SC         | Stress Response                      | Stress Response      | 1     | 0    |     |     |      |      | 0          | 0          | 0         | 0           | 0          | 1            | 0         | 0           | 0          |              |
| Nitrogen regulation protein NtrB (EC 2.7.13.3) (aka glnL)                | Stress Response                      | Stress Response      | 1     | 0    |     |     |      |      | 0          | 0          | 0         | 0           | 0          | 1            | 0         | 1           | 0          |              |
| Nitrogen regulation protein NtrC (aka glnG)                              | Stress Response                      | Stress Response      | 1     | 0    |     |     |      |      | 0          | 0          | 0         | 0           | 0          | 0            | 0         | 1           | 0          |              |
| NtrC family Transcriptional regulator, ATPase domain                     | Stress Response                      | Stress Response      | 1     | 0    |     |     |      |      | 0          | 0          | 0         | 0           | 1          | 0            | 0         | 0           | 0          |              |
| Probable protease HtpX (EC 3.4.24.-)                                     | Stress Response                      | Stress Response      | 1     | 0    |     | 1   |      |      | 0          | 0          | 0         | 0           | 0          | 0            | 1         | 0           | 0          |              |
| protein iraP                                                             | Stress Response                      | Stress Response      | 1     | 1    |     |     |      |      | 0          | 0          | 0         | 0           | 1          | 0            | 1         | 0           | 0          |              |
| Protein sprT                                                             | Stress Response                      | Stress Response      | 1     | 0    |     |     |      |      | 0          | 0          | 0         | 0           | 0          | 1            | 0         | 1           | 0          |              |
| Putative ThuR, regulatory protein for trehalose/maltose transport        | Stress Response                      | Stress Response      | 1     | 0    |     |     |      |      | 0          | 0          | 0         | 0           | 0          | 0            | 0         | 1           | 0          |              |
| Rtn protein                                                              | Stress Response                      | Stress Response      | 1     | 0    |     |     |      |      | 0          | 0          | 0         | 0           | 0          | 0            | 1         | 0           | 0          |              |
| Sensory box/GGDEF family protein                                         | Stress Response                      | Stress Response      | 1     | 0    |     |     |      |      | 0          | 0          | 0         | 0           | 0          | 0            | 1         | 0           | 0          |              |
| Starvation lipoprotein Slp paralogs                                      | Stress Response                      | Stress Response      | 1     | 0    |     |     |      |      | 0          | 0          | 0         | 0           | 0          | 0            | 0         | 1           | 0          |              |
| Stationary phase inducible protein CsiE                                  | Stress Response                      | Stress Response      | 1     | 0    |     |     |      |      | 0          | 0          | 0         | 0           | 1          | 0            | 1         | 0           | 0          |              |
| Transcriptional activator RamA                                           | Stress Response                      | Stress Response      | 1     | 0    |     |     |      |      | 0          | 0          | 0         | 0           | 0          | 0            | 1         | 0           | 0          |              |
| Transcriptional regulator, IcdR family                                   | Stress Response                      | Stress Response      | 1     | 0    | 1   |     |      |      | 1          | 0          | 0         | 0           | 1          | 0            | 1         | 0           | 0          |              |
| Uncharacterized protein YqjB                                             | Stress Response                      | Stress Response      | 1     | 0    |     |     |      |      | 0          | 0          | 0         | 0           | 0          | 1            | 0         | 1           | 0          |              |
| Universal stress protein F                                               | Stress Response                      | Stress Response      | 1     | 0    |     |     |      |      | 0          | 0          | 0         | 0           | 0          | 0            | 1         | 0           | 0          |              |
| UPF0337 protein - YjbJ-unchar general stress protein                     | Stress Response                      | Stress Response      | 1     | 1    |     |     |      | 1    | 0          | 0          | 0         | 0           | 1          | 0            | 1         | 0           | 0          |              |
| SUBTOTAL                                                                 |                                      |                      | 21    | 4    | 2   | 0   | 1    | 2    | 2          | 2          | 0         | 0           | 7          | 4            | 13        | 6           | 1          |              |
| Cold shock protein CspA                                                  | Stress Response                      | Cold shock           | 1     | 0    |     |     |      |      | 0          | 0          | 0         | 1           | 0          | 1            | 0         | 1           | 0          |              |
| FIG005189: putative transferase clustered with tellurite resistance prot | Stress Response                      | Detoxification       | 1     | 0    |     |     |      |      | 0          | 0          | 0         | 0           | 1          | 0            | 1         | 0           | 0          |              |
| TsgA protein homolog                                                     | Stress Response                      | Detoxification       | 1     | 0    |     |     |      |      | 0          | 0          | 0         | 0           | 0          | 0            | 0         | 1           | 0          |              |
| Uncharacterized membrane lipoprotein clustered with tellurite resistan   | Stress Response                      | Detoxification       | 1     | 0    |     |     |      |      | 0          | 0          | 0         | 0           | 0          | 0            | 1         | 0           | 0          |              |
| Heat shock protein hslJ                                                  | Stress Response                      | Heat shock           | 1     | 0    |     |     |      | RpoH | 0          | 0          | 0         | 0           | 0          | 1            | 0         | 1           | 0          |              |
| Small heat shock protein-lbpA-like holding chaperone (protein BLAST)     | Stress Response                      | Heat shock           | 1     | 0    |     |     |      |      | 0          | 0          | 0         | 0           | 1          | 0            | 1         | 0           | 0          |              |
| SUBTOTAL                                                                 |                                      |                      | 6     | 0    | 0   | 0   | 0    | 0    | 0          | 0          | 0         | 1           | 2          | 2            | 3         | 3           | 0          |              |
| FIG004088: inner membrane protein YebE                                   | Uncharacterized                      | Uncharacterized      | 1     | 0    |     | 1   |      |      | 0          | 0          | 0         | 0           | 0          | 1            | 0         | 0           | 0          |              |
| FIG00731387: hypothetical protein-YgaU                                   | Uncharacterized                      | Uncharacterized      | 1     | 1    |     |     |      |      | 0          | 0          | 0         | 0           | 1          | 0            | 1         | 0           | 0          |              |
| FIG00731925: hypothetical protein-Two-component-system connector         | Uncharacterized                      | Uncharacterized      | 1     | 1    |     |     |      |      | 0          | 0          | 0         | 0           | 0          | 0            | 1         | 0           | 0          |              |
| GENE                                                                     | SEED CATEGORY                        | SEED SUBCATEGC       | count | RpoS | CRP | Fur | CpxR | rcs  | other      | osmo-ind** | BR7-2h-up | BR7-2h-down | BR21-2h-up | BR21-2h-down | BR7-8h-up | BR7-8h-down | BR21-8h-up | BR21-8h-down |
| FIG00732338: hypothetical protein - YgaM                                 | Uncharacterized                      | Uncharacterized      | 1     | 1    |     |     | 1    |      |            | 0          | 0         | 0           | 0          | 0            | 1         | 0           | 1          | 0            |
| FIG01219827: hypothetical protein - ygaC                                 | Uncharacterized                      | Uncharacterized      | 1     | 0    |     |     |      | 1    |            | 0          | 0         | 0           | 0          | 0            | 1         | 0           | 1          | 0            |
| probable lipoprotein- yjbP                                               | Uncharacterized                      | Uncharacterized      | 1     | 1    |     |     |      |      |            | 0          | 0         | 0           | 0          | 0            | 0         | 1           | 0          | 0            |
| SUBTOTAL                                                                 |                                      |                      | 6     | 4    | 0   | 1   | 2    | 1    |            | 0          | 0         | 0           | 0          | 0            | 3         | 1           | 5          | 0            |
| SbmA protein                                                             | Virulence, Disease and Dr            | Resistance to anti   | 1     | 0    |     |     |      |      | RpoE       | 0          | 0         | 0           | 0          | 0            | 0         | 0           | 1          | 0            |
| Glyoxalase family protein                                                | Virulence, Disease and Dr            | Resistance to anti   | 1     |      |     |     |      |      |            | 1          | 0         | 0           | 0          | 1            | 0         | 1           | 0          | 0            |
| SUBTOTAL                                                                 |                                      |                      | 2     | 0    | 0   | 0   | 0    | 0    | 0          | 0          | 1         | 0           | 0          | 0            | 1         | 0           | 1          | 1            |
| Summary                                                                  |                                      |                      | count | RpoS | CRP | Fur | CpxR | rcs  | other      | osmo-ind** | BR7-2h-up | BR7-2h-down | BR21-2h-up | BR21-2h-down | BR7-8h-up | BR7-8h-down | BR21-8h-up | BR21-8h-down |
|                                                                          | Amino Acids and Derivatives          |                      | 15    | 11   | 6   | 2   | 1    | 0    |            | 5          | 4         | 0           | 4          | 1            | 9         | 2           | 14         | 1            |
|                                                                          | Carbohydrates                        |                      | 23    | 16   | 9   | 0   | 0    | 1    | iaeRS, Pho | 9          | 6         | 0           | 2          | 0            | 15        | 1           | 19         | 4            |
|                                                                          | Cell Division and Cell Cycle         |                      | 3     | 3    | 0   | 0   | 0    | 0    |            | 1          | 0         | 0           | 0          | 2            | 0         | 0           | 1          | 1            |
|                                                                          | Cell Wall and Capsule                |                      | 7     | 4    | 0   | 0   | 1    | 1    | RpoE       | 3          | 0         | 0           | 0          | 0            | 3         | 1           | 5          | 2            |
|                                                                          | DNA Metabolism                       |                      | 2     | 0    | 1   | 0   | 0    | 0    |            | 0          | 1         | 0           | 0          | 0            | 1         | 0           | 2          | 0            |
|                                                                          | Dormancy and Sporulation             |                      | 2     | 2    | 0   | 0   | 0    | 0    | RpoE       | 2          | 0         | 0           | 0          | 0            | 1         | 0           | 2          | 0            |
|                                                                          | Fatty Acids, Lipids, and Isoprenoids |                      | 1     | 1    | 0   | 0   | 0    | 0    |            | 0          | 0         | 0           | 0          | 0            | 1         | 0           | 1          | 0            |
|                                                                          | Iron acquisition and metabolism      |                      | 7     | 2    | 4   | 5   | 0    | 0    |            | 1          | 0         | 0           | 2          | 0            | 2         | 3           | 7          | 0            |
|                                                                          | Membrane Transport                   |                      | 6     | 3    | 0   | 0   | 1    | 1    |            | 2          | 0         | 0           | 0          | 0            | 2         | 0           | 4          | 2            |
|                                                                          | Nitrogen Metabolism                  |                      | 3     | 2    | 0   | 0   | 1    | 0    | Fnrr       | 1          | 0         | 2           | 0          | 1            | 1         | 2           | 1          | 2            |
|                                                                          | Protein Metabolism                   |                      | 7     | 1    | 0   | 0   | 0    | 2    | RpoE, RpoH | 0          | 0         | 0           | 0          | 0            | 3         | 0           | 2          | 4            |
|                                                                          | Regulation and Cell signaling        |                      | 2     | 0    | 0   | 0   | 0    | 0    |            | 0          | 0         | 0           | 0          | 0            | 0         | 0           | 2          | 0            |

|                                        |     |    |    |    |   |    |      |    |   |   |   |    |    |     |    |
|----------------------------------------|-----|----|----|----|---|----|------|----|---|---|---|----|----|-----|----|
| Respiration                            | 2   | 1  | 0  | 0  | 1 | 0  | 0    | 0  | 0 | 0 | 0 | 0  | 1  | 1   | 0  |
| RNA Metabolism                         | 3   | 2  | 0  | 1  | 0 | 0  | 0    | 0  | 0 | 0 | 0 | 1  | 0  | 3   | 0  |
| Osmotic stress                         | 34  | 19 | 4  | 5  | 1 | 2  | 34   | 0  | 0 | 0 | 1 | 14 | 1  | 30  | 3  |
| Oxidative stress                       | 15  | 1  | 1  | 0  | 0 | 0  | 0    | 1  | 1 | 1 | 1 | 4  | 1  | 12  | 2  |
| Peptidoglycan damage                   | 1   | 0  | 0  | 0  | 0 | 0  | 0    | 0  | 0 | 0 | 0 | 0  | 0  | 1   | 0  |
| Cold shock, Heat Shock, Detoxification | 6   | 0  | 0  | 0  | 0 | 0  | 0    | 0  | 0 | 0 | 1 | 2  | 2  | 3   | 3  |
| Virulence, Disease and Defense         | 2   | 0  | 0  | 0  | 0 | 0  | RpoE | 0  | 1 | 0 | 0 | 0  | 1  | 0   | 1  |
| Stress Response-General                | 21  | 4  | 2  | 0  | 1 | 2  | 2    | 2  | 0 | 0 | 0 | 7  | 4  | 13  | 6  |
| Uncharacterized                        | 6   | 4  | 0  | 1  | 2 | 1  | 0    | 0  | 0 | 0 | 0 | 3  | 1  | 5   | 0  |
| Total                                  | 168 | 76 | 27 | 14 | 9 | 12 | 60   | 15 | 3 | 9 | 7 | 70 | 19 | 129 | 31 |

**\*\*Weber H, Polen T, Heuveling J, Wendisch VF, Hengge R.** 2005. Genome-wide analysis of the general stress response network in *Escherichia coli*: sigmaS-dependent genes, promoters, and sigma factor selectivity. *J Bacteriol* **187**:1591-160:
